# Supplementary material for: Pharmacological Effects of Agastache rugosa against Gastritis Using a Network Pharmacology Approach
Source: MDPI journal article supplement (doi:10.3390/biom10091298), 2020-09-09
Supplement: s1 [file s1]

Supplementary table 1. Chemical components in Agastache rugosa through ADME screening

| No. | Sources   | Chemical names                              | Mol ID    | MW     | AlogP | Hdon | Hacc | OB (%) | Caco-2 | BBB   | DL   | FASA- | TPSA   | RBN | HL    |
|-----|-----------|---------------------------------------------|-----------|--------|-------|------|------|--------|--------|-------|------|-------|--------|-----|-------|
| 1   | Isolation | Luteolin                                    | MOL000006 | 286.25 | 2.07  | 4    | 6    | 36.16  | 0.19   | -0.84 | 0.25 | 0.39  | 111.13 | 1   | 15.94 |
| 2   | Isolation | Apigenitr                                   | MOL000007 | 432.41 | 0.43  | 6    | 10   | 9.68   | -1.08  | -2.26 | 0.74 | 0.32  | 170.05 | 4   |       |
|     | korenaTK  | Apigenitr                                   | MOL000007 | 432.41 | 0.43  | 6    | 10   | 9.68   | -1.08  | -2.26 | 0.74 | 0.32  | 170.05 | 4   |       |
| 3   | Isolation | Apigenin                                    | MOL000008 | 270.25 | 2.33  | 3    | 5    | 23.06  | 0.43   | -0.61 | 0.21 | 0.41  | 90.9   | 1   |       |
|     | TM-MC     | Apigenin                                    | MOL000008 | 270.25 | 2.33  | 3    | 5    | 23.06  | 0.43   | -0.61 | 0.21 | 0.41  | 90.9   | 1   |       |
| 4   | Isolation | Luteoloside                                 | MOL000009 | 448.41 | 0.16  | 7    | 11   | 7.29   | -1.23  | -2.49 | 0.78 | 0.32  | 190.28 | 4   |       |
| 5   | TM-MC     | Limonene                                    | MOL000023 | 136.26 | 3.5   | 0    | 0    | 39.84  | 1.83   | 2.12  | 0.02 | 0     | 0      | 1   | 11.68 |
| 6   | TM-MC     | alpha-caryophyllene                         | MOL000024 | 204.39 | 5.04  | 0    | 0    | 22.98  | 1.88   | 2.08  | 0.06 | 0     | 0      | 0   |       |
| 7   | TM-MC     | Caryophyllene                               | MOL000036 | 204.39 | 4.75  | 0    | 0    | 29.7   | 1.83   | 2.07  | 0.09 | 0     | 0      | 0   |       |
| 8   | TM-MC     | gamma-elemene (=elixerene)                  | MOL000037 | 204.39 | 4.93  | 0    | 0    | 23.79  | 1.87   | 2.1   | 0.06 | 0     | 0      | 2   |       |
| 9   | TM-MC     | Palmitic acid (=hexadecanoic acid)          | MOL000069 | 256.48 | 6.37  | 1    | 2    | 19.3   | 1.09   | 1     | 0.1  | 0     | 37.3   | 14  |       |
| 10  | korenaTK  | para-Cymene                                 | MOL000117 | 134.24 | 3.51  | 0    | 0    | 27.2   | 1.86   | 2.1   | 0.02 | 0.34  | 0      | 1   |       |
| 11  | TM-MC     | alpha-pinene                                | MOL000125 | 136.26 | 2.87  | 0    | 0    | 46.25  | 1.85   | 2.3   | 0.05 | 0.25  | 0      | 0   | 11.42 |
|     | korenaTK  | alpha-Pinene(+,-)                           | MOL000125 | 136.26 | 2.87  | 0    | 0    | 46.25  | 1.85   | 2.3   | 0.05 | 0.25  | 0      | 0   | 11.42 |
| 12  | TM-MC     | beta-pinene                                 | MOL000126 | 136.26 | 2.93  | 0    | 0    | 44.84  | 1.8    | 2.12  | 0.05 | 0.27  | 0      | 0   | 11.32 |
|     | korenaTK  | beta-Pinene(+)                              | MOL000126 | 136.26 | 2.93  | 0    | 0    | 44.84  | 1.8    | 2.12  | 0.05 | 0.27  | 0      | 0   | 11.32 |
| 13  | TM-MC     | Linoleic acid                               | MOL000131 | 280.5  | 6.39  | 1    | 2    | 41.9   | 1.16   | 0.9   | 0.14 | 0.25  | 37.3   | 14  | 7.5   |
| 14  | TM-MC     | gamma-terpinene                             | MOL000202 | 136.26 | 3.45  | 0    | 0    | 33.02  | 1.88   | 2.05  | 0.02 | 0.27  | 0      | 1   | 11.08 |
| 15  | korenaTK  | Methyleugenol                               | MOL000207 | 178.25 | 2.81  | 0    | 2    | 73.36  | 1.47   | 1.41  | 0.04 | 0.27  | 18.46  | 4   | 2.92  |
|     | TM-MC     | Methyleugenol                               | MOL000207 | 178.25 | 2.81  | 0    | 2    | 73.36  | 1.47   | 1.41  | 0.04 | 0.27  | 18.46  | 4   | 2.92  |
| 16  | TM-MC     | Aromadendrene                               | MOL000208 | 204.39 | 4.22  | 0    | 0    | 55.74  | 1.81   | 2.06  | 0.1  | 0.26  | 0      | 0   | 11.84 |
| 17  | TM-MC     | alpha-terpineol                             | MOL000232 | 154.28 | 2.42  | 1    | 1    | 46.3   | 1.28   | 1.4   | 0.03 | 0.26  | 20.23  | 1   | 10.75 |
| 18  | TM-MC     | Eugenol                                     | MOL000254 | 164.22 | 2.55  | 1    | 2    | 56.24  | 1.35   | 1.32  | 0.04 | 0.32  | 29.46  | 3   | 0.92  |
| 19  | TM-MC     | Carvacrol                                   | MOL000259 | 150.24 | 3.24  | 1    | 1    | 43.28  | 1.58   | 1.71  | 0.03 | 0.33  | 20.23  | 1   | 11.29 |
| 20  | korenaTK  | Oleanolic acid                              | MOL000263 | 456.78 | 6.42  | 2    | 3    | 29.02  | 0.59   | 0.07  | 0.76 | 0.25  | 57.53  | 1   |       |
| 21  | TM-MC     | Caffeic acid                                | MOL000414 | 180.17 | 1.37  | 3    | 4    | 54.97  | 0.27   | 0.11  | 0.05 | 0     | 77.76  | 2   | 1.63  |
| 22  | TM-MC     | Calycosin                                   | MOL000417 | 284.28 | 2.32  | 2    | 5    | 47.75  | 0.52   | -0.43 | 0.24 | 0     | 79.9   | 2   | 17.1  |
| 23  | korenaTK  | Anethole                                    | MOL000475 | 148.22 | 2.77  | 0    | 1    | 32.49  | 1.75   | 1.81  | 0.03 | 0     | 9.23   | 2   | 1.68  |
| 24  | korenaTK  | beta-Farnesene                              | MOL000479 | 204.39 | 5.52  | 0    | 0    | 17.42  | 1.95   | 2.21  | 0.05 | 0     | 0      | 7   |       |
| 25  | TM-MC     | Genistein                                   | MOL000481 | 270.25 | 2.07  | 3    | 5    | 17.93  | 0.43   | -0.4  | 0.21 | 0     | 90.9   | 1   |       |
| 26  | TM-MC     | Kaempferol 3-O-glucoside                    | MOL000561 | 448.41 | -0.32 | 7    | 11   | 14.03  | -1.34  | -1.97 | 0.74 | 0.34  | 190.28 | 4   |       |
| 27  | TM-MC     | beta-bourbonene                             | MOL000611 | 204.39 | 4.22  | 0    | 0    | 16.98  | 1.82   | 2.11  | 0.11 | 0.27  | 0      | 1   |       |
| 28  | TM-MC     | para-menthan-3-one                          | MOL000715 | 154.28 | 2.6   | 0    | 1    | 57.9   | 1.35   | 1.7   | 0.03 | 0.24  | 17.07  | 1   | 10.57 |
| 29  | korenaTK  | 1,3,11-Elematriene (=beta-elemene)          | MOL000908 | 204.39 | 4.79  | 0    | 0    | 25.63  | 1.84   | 2.07  | 0.06 | 0.33  | 0      | 3   |       |
|     | TM-MC     | beta-elemene                                | MOL000908 | 204.39 | 4.79  | 0    | 0    | 25.63  | 1.84   | 2.07  | 0.06 | 0.33  | 0      | 3   |       |
| 30  | korenaTK  | Linalool                                    | MOL000920 | 154.28 | 2.74  | 1    | 1    | 38.29  | 1.29   | 1.33  | 0.02 | 0.32  | 20.23  | 4   | 6.29  |
|     | TM-MC     | Linalool                                    | MOL000920 | 154.28 | 2.74  | 1    | 1    | 38.29  | 1.29   | 1.33  | 0.02 | 0.32  | 20.23  | 4   | 6.29  |
| 31  | TM-MC     | cis-alpha-farnesene                         | MOL000930 | 204.39 | 5.46  | 0    | 0    | 8.15   | 1.92   | 1.85  | 0.05 | 0.35  | 0      | 6   |       |
| 32  | TM-MC     | alpha-farnesene                             | MOL000932 | 204.39 | 5.46  | 0    | 0    | 21.7   | 1.97   | 1.89  | 0.05 | 0.32  | 0      | 6   |       |
| 33  | TM-MC     | Germacrene B                                | MOL000936 | 204.39 | 5.47  | 0    | 0    | 18.69  | 1.89   | 2.07  | 0.06 | 0.29  | 0      | 0   |       |
| 34  | TM-MC     | Isodene                                     | MOL000937 | 204.39 | 4.36  | 0    | 0    | 49.01  | 1.82   | 2.08  | 0.1  | 0.22  | 0      | 0   | 12.47 |
| 35  | TM-MC     | alpha-murolene                              | MOL001123 | 204.39 | 4.75  | 0    | 0    | 19.5   | 1.84   | 2.16  | 0.08 | 0.25  | 0      | 1   |       |
| 36  | TM-MC     | gamma-murolene                              | MOL001180 | 204.39 | 4.8   | 0    | 0    | 21.53  | 1.84   | 2.05  | 0.08 | 0.25  | 0      | 1   |       |
| 37  | TM-MC     | Bicyclogermacrene                           | MOL001184 | 204.39 | 4.7   | 0    | 0    | 30.73  | 1.86   | 2.13  | 0.08 | 0.25  | 0      | 0   | 5.62  |
| 38  | TM-MC     | Caryophyllene oxide                         | MOL001193 | 235.38 | 2.17  | 0    | 2    | 45.75  | 1.09   | 1.27  | 0.15 | 0.03  | 35.59  | 0   | 7.08  |
| 39  | korenaTK  | beta-Sitosterol                             | MOL001488 | 414.79 | 8.08  | 1    | 1    | 6.59   | 1.42   | 1.16  | 0.75 | 0.2   | 20.23  | 6   |       |
| 40  | TM-MC     | Acetophenone                                | MOL001578 | 120.16 | 1.57  | 0    | 1    | 48.19  | 1.36   | 1.54  | 0.02 | 0.45  | 17.07  | 1   | 25.2  |
| 41  | TM-MC     | alpha-cadinol                               | MOL001599 | 208.38 | 3.28  | 1    | 1    | 64.81  | 1.32   | 1.43  | 0.09 | 0.26  | 20.23  | 0   | 7.24  |
| 42  | Isolation | Phlorizin                                   | MOL001623 | 436.45 | 0.75  | 7    | 10   | 2.88   | -1.23  | -2.02 | 0.6  | 0.34  | 177.14 | 7   |       |
| 43  | Isolation | Acacetin                                    | MOL001689 | 284.28 | 2.59  | 2    | 5    | 34.97  | 0.67   | -0.05 | 0.24 | 0.35  | 79.9   | 2   | 17.25 |
|     | korenaTK  | Acacetin                                    | MOL001689 | 284.28 | 2.59  | 2    | 5    | 34.97  | 0.67   | -0.05 | 0.24 | 0.35  | 79.9   | 2   | 17.25 |
| 44  | TM-MC     | 3-O-Caffeoylquinic acid (=chlorogenic acid) | MOL001955 | 354.34 | -0.42 | 6    | 9    | 11.93  | -1.03  | -1.71 | 0.33 | 0.37  | 164.75 | 5   |       |
|     | TM-MC     | Pulegone                                    | MOL001972 | 152.26 | 2.75  | 0    | 1    | 51.6   | 1.39   | 1.74  | 0.03 | 0.26  | 17.07  | 0   | 11.19 |
| 46  | korenaTK  | Acetyl oleanolic aldehyde                   | MOL002001 | 498.82 | 6.8   | 1    | 4    | 14.24  | 0.65   | 0.13  | 0.7  | 0.24  | 63.6   | 3   |       |
| 47  | TM-MC     | Thymol                                      | MOL002042 | 150.24 | 3.24  | 1    | 1    | 41.47  | 1.6    | 1.68  | 0.03 | 0.33  | 20.23  | 1   | 11.33 |
| 48  | TM-MC     | alpha-cubebene                              | MOL002085 | 204.39 | 4.17  | 0    | 0    | 16.73  | 1.83   | 2.1   | 0.11 | 0.25  | 0      | 1   |       |
| 49  | TM-MC     | Spatulenol (=1H-Cycloprop(e)azulen-7-ol)    | MOL002153 | 220.39 | 3.01  | 1    | 1    | 82.33  | 1.37   | 1.49  | 0.12 | 0.28  | 20.23  | 0   | 12.04 |
| 50  | korenaTK  | Estragole                                   | MOL002361 | 148.22 | 2.82  | 0    | 1    | 36.59  | 1.72   | 1.83  | 0.03 | 0.34  | 9.23   | 3   | 1.79  |
|     | TM-MC     | Estragole (=methylchavicol)                 | MOL002361 | 148.22 | 2.82  | 0    | 1    | 36.59  | 1.72   | 1.83  | 0.03 | 0.34  | 9.23   | 3   | 1.79  |
| 51  | korenaTK  | Anisaldehyde                                | MOL002836 | 136.16 | 1.57  | 0    | 2    | 21.54  | 1.12   | 1.15  | 0.02 | 0.33  | 26.3   | 2   |       |
| 52  | Isolation | Diosmetin                                   | MOL002881 | 300.28 | 2.32  | 3    | 6    | 31.14  | 0.46   | -0.66 | 0.27 | 0.34  | 100.13 | 2   | 16.34 |
| 53  | Isolation | Ethyl caffeate                              | MOL002902 | 208.23 | 1.97  | 2    | 4    | 103.85 | 0.73   | 0.51  | 0.07 | 0.34  | 66.76  | 4   | 3.76  |
| 54  | TM-MC     | Germacrene D                                | MOL003127 | 204.39 | 5.14  | 0    | 0    | 19.22  | 1.83   | 2.02  | 0.06 | 0     | 0      | 1   |       |
| 55  | TM-MC     | tau-murolol                                 | MOL003537 | 222.41 | 3.78  | 1    | 1    | 30.41  | 1.36   | 1.44  | 0.09 | 0.23  | 20.23  | 1   | 7.11  |
| 56  | korenaTK  | delta-Cadinene                              | MOL003556 | 204.39 | 4.94  | 0    | 0    | 20.29  | 1.83   | 2.1   | 0.08 | 0     | 0      | 1   |       |
|     | TM-MC     | delta-Cadinene                              | MOL003556 | 204.39 | 4.94  | 0    | 0    | 20.29  | 1.83   | 2.1   | 0.08 | 0     | 0      | 1   |       |
| 57  | TM-MC     | Esculetin                                   | MOL003837 | 178.15 | 1.37  | 2    | 4    | 22.97  | 0.44   | 0.02  | 0.07 | 0.36  | 70.67  | 0   |       |
| 58  | TM-MC     | Cuminic alcohol                             | MOL003948 | 150.24 | 2.42  | 1    | 1    | 42.57  | 1.2    | 1.24  | 0.03 | 0.3   | 20.23  | 2   | 1.58  |
| 59  | korenaTK  | Calamenene(-)                               | MOL004079 | 202.37 | 5.04  | 0    | 0    | 17.31  | 1.89   | 2.1   | 0.08 | 0     | 0      | 1   |       |
| 60  | TM-MC     | Viridiflorol                                | MOL004419 | 222.41 | 3.2   | 1    | 1    | 19.94  | 1.31   | 1.43  | 0.12 | 0     | 20.23  | 0   |       |
| 61  | Isolation | Anisic acid                                 | MOL005125 | 152.16 | 1.42  | 1    | 3    | 29.69  | 0.69   | 0.51  | 0.03 | 0.36  | 46.53  | 2   |       |
| 62  | korenaTK  | Maslinic acid                               | MOL005559 | 472.78 | 5.46  | 3    | 4    | 15.54  | 0.1    | -0.55 | 0.74 | 0.25  | 77.76  | 1   |       |
| 63  | TM-MC     | Morriol (=1-octen-3-ol)                     | MOL005729 | 416.62 | 5.91  | 4    | 7    |        |        |       |      |       |        |     |       |
