# Supplementary material for: Pharmacological Effects of Agastache rugosa against Gastritis Using a Network Pharmacology Approach
Source: MDPI journal article supplement (doi:10.3390/biom10091298), 2020-09-09
Supplement: s1 [file s1]

**Supplementary table 4. Protein-protein interactions in STITCH DB**

| <b>node1</b> | <b>node2</b> | <b>node1_string_internal_id</b> | <b>node2_string_internal_id</b> | <b>combined_score</b> |
|--------------|--------------|---------------------------------|---------------------------------|-----------------------|
| MAPK9        | JUND         | 1859420                         | 1844164                         | 0.999                 |
| MTOR         | RPS6KB1      | 1854147                         | 1843035                         | 0.999                 |
| MTOR         | MAPKAP1      | 1854147                         | 1845827                         | 0.999                 |
| CDCA8        | BIRC5        | 1849847                         | 1848314                         | 0.999                 |
| HSP90AA1     | TP53         | 1851814                         | 1846083                         | 0.999                 |
| AURKB        | INCENP       | 1863844                         | 1858231                         | 0.999                 |
| CTNNB1       | EP300        | 1852818                         | 1845316                         | 0.999                 |
| CTNNB1       | ERBB2        | 1852818                         | 1846101                         | 0.999                 |
| SHC1         | CBL          | 1860266                         | 1845465                         | 0.999                 |
| HSP90AA1     | EGFR         | 1851814                         | 1846445                         | 0.999                 |
| TP53         | CDKN1A       | 1846083                         | 1843736                         | 0.999                 |
| EIF4EBP1     | AKT1         | 1852358                         | 1846136                         | 0.999                 |
| AKT1S1       | RPTOR        | 1852495                         | 1848942                         | 0.999                 |
| NOS3         | AKT1         | 1847875                         | 1846136                         | 0.999                 |
| EGFR         | STAT3        | 1846445                         | 1845584                         | 0.999                 |
| MTOR         | AKT1S1       | 1854147                         | 1852495                         | 0.999                 |
| EP300        | SMAD2        | 1845316                         | 1845079                         | 0.999                 |
| BCL2L11      | BCL2L1       | 1858084                         | 1848421                         | 0.999                 |
| RICTOR       | EIF4EBP1     | 1853522                         | 1852358                         | 0.999                 |
| JUN          | MAPK3        | 1855436                         | 1845265                         | 0.999                 |
| BCAR1        | PTK2         | 1859585                         | 1852426                         | 0.999                 |
| EGFR         | CDH1         | 1846445                         | 1844988                         | 0.999                 |
| BRCA1        | TP53         | 1861387                         | 1846083                         | 0.999                 |
| MDM2         | EP300        | 1861282                         | 1845316                         | 0.999                 |
| MAPK9        | JUN          | 1859420                         | 1855436                         | 0.999                 |
| MAPK8        | TP53         | 1853988                         | 1846083                         | 0.999                 |
| PTK2         | GRB2         | 1852426                         | 1852164                         | 0.999                 |
| HSP90AA1     | NOS3         | 1851814                         | 1847875                         | 0.999                 |
| RICTOR       | RPS6KB1      | 1853522                         | 1843035                         | 0.999                 |
| CASP9        | CASP3        | 1851230                         | 1849375                         | 0.999                 |
| CTNNB1       | EGFR         | 1852818                         | 1846445                         | 0.999                 |
| JUN          | EP300        | 1855436                         | 1845316                         | 0.999                 |
| GRB2         | ERBB2        | 1852164                         | 1846101                         | 0.999                 |
| EZH2         | EED          | 1850211                         | 1845338                         | 0.999                 |
| MTOR         | RHEB         | 1854147                         | 1845084                         | 0.999                 |
| TP53         | EP300        | 1846083                         | 1845316                         | 0.999                 |
| MAPK8        | FOS          | 1853988                         | 1848822                         | 0.999                 |
| HSP90AA1     | PPP5C        | 1851814                         | 1842173                         | 0.999                 |
| AKT1         | EP300        | 1846136                         | 1845316                         | 0.999                 |
| MLST8        | RPTOR        | 1858459                         | 1848942                         | 0.999                 |
| JUN          | MAPK8        | 1855436                         | 1853988                         | 0.999                 |
| MDM2         | TP53         | 1861282                         | 1846083                         | 0.999                 |
| HSP90AA1     | AHSA1        | 1851814                         | 1842603                         | 0.999                 |
| EIF4EBP1     | MAPKAP1      | 1852358                         | 1845827                         | 0.999                 |
| ATM          | TP53         | 1846577                         | 1846083                         | 0.999                 |
| SHC1         | KDR          | 1860266                         | 1845437                         | 0.999                 |
| FOXO1        | AKT1         | 1857055                         | 1846136                         | 0.999                 |
| JUN          | FOS          | 1855436                         | 1848822                         | 0.999                 |
| JUN          | ATF2         | 1855436                         | 1845482                         | 0.999                 |
| JUN          | MAPK10       | 1855436                         | 1853804                         | 0.999                 |
| IKBKG        | NFKBIA       | 1855067                         | 1842621                         | 0.999                 |

|          |          |         |         |       |
|----------|----------|---------|---------|-------|
| MAPK8    | JUND     | 1853988 | 1844164 | 0.999 |
| FKBP1A   | TGFBR1   | 1857423 | 1856216 | 0.999 |
| APAF1    | BCL2L1   | 1862487 | 1848421 | 0.999 |
| EZH2     | SUZ12    | 1850211 | 1849881 | 0.999 |
| AKT1S1   | MAPKAP1  | 1852495 | 1845827 | 0.999 |
| CTNND1   | EGFR     | 1858683 | 1846445 | 0.999 |
| SHC1     | ERBB2    | 1860266 | 1846101 | 0.999 |
| MTOR     | AKT1     | 1854147 | 1846136 | 0.999 |
| SUZ12    | EED      | 1849881 | 1845338 | 0.999 |
| RICTOR   | AKT1     | 1853522 | 1846136 | 0.999 |
| MAPK9    | ATF2     | 1859420 | 1845482 | 0.999 |
| AKT1     | MAPKAP1  | 1846136 | 1845827 | 0.999 |
| MDM2     | CDKN1A   | 1861282 | 1843736 | 0.999 |
| MLST8    | MTOR     | 1858459 | 1854147 | 0.999 |
| CTNNB1   | CDH1     | 1852818 | 1844988 | 0.999 |
| INCENP   | BIRC5    | 1858231 | 1848314 | 0.999 |
| APAF1    | CASP9    | 1862487 | 1851230 | 0.999 |
| IKKBK    | NFKBIA   | 1861846 | 1842621 | 0.999 |
| HSP90AA1 | CDC37    | 1851814 | 1842879 | 0.999 |
| INCENP   | CDCA8    | 1858231 | 1849847 | 0.999 |
| SHC1     | EGFR     | 1860266 | 1846445 | 0.999 |
| MLST8    | AKT1S1   | 1858459 | 1852495 | 0.999 |
| IGFBP3   | IGF1     | 1857331 | 1848439 | 0.999 |
| STAT1    | EGFR     | 1854113 | 1846445 | 0.999 |
| GRB2     | EGFR     | 1852164 | 1846445 | 0.999 |
| AKT1     | CDKN1A   | 1846136 | 1843736 | 0.999 |
| EGFR     | ERBB2    | 1846445 | 1846101 | 0.999 |
| MLST8    | EIF4EBP1 | 1858459 | 1852358 | 0.999 |
| RICTOR   | AKT1S1   | 1853522 | 1852495 | 0.999 |
| NFE2L2   | KEAP1    | 1858451 | 1842313 | 0.999 |
| STAT1    | EP300    | 1854113 | 1845316 | 0.999 |
| EGFR     | CBL      | 1846445 | 1845465 | 0.999 |
| HSP90AA1 | ERBB2    | 1851814 | 1846101 | 0.999 |
| KAT2B    | EP300    | 1845408 | 1845316 | 0.999 |
| HSP90AA1 | STIP1    | 1851814 | 1848791 | 0.999 |
| HSP90AA1 | AKT1     | 1851814 | 1846136 | 0.999 |
| PPARG    | EP300    | 1847090 | 1845316 | 0.999 |
| MTOR     | STAT3    | 1854147 | 1845584 | 0.999 |
| FOXH1    | SMAD2    | 1856663 | 1845079 | 0.999 |
| JUN      | ATF3     | 1855436 | 1852803 | 0.999 |
| AURKB    | CDCA8    | 1863844 | 1849847 | 0.999 |
| HSP90AA1 | PTGES3   | 1851814 | 1845046 | 0.999 |
| MTOR     | RICTOR   | 1854147 | 1853522 | 0.999 |
| RICTOR   | MAPKAP1  | 1853522 | 1845827 | 0.999 |
| STAT1    | STAT3    | 1854113 | 1845584 | 0.999 |
| VEGFA    | FLT1     | 1855611 | 1846791 | 0.999 |
| IGF2     | IGFBP3   | 1859600 | 1857331 | 0.999 |
| GRB2     | CBL      | 1852164 | 1845465 | 0.999 |
| FKBP1A   | MTOR     | 1857423 | 1854147 | 0.999 |
| MAPK9    | TP53     | 1859420 | 1846083 | 0.999 |
| FOS      | JUND     | 1848822 | 1844164 | 0.999 |
| MLST8    | RICTOR   | 1858459 | 1853522 | 0.999 |
| IKKBK    | IKBKG    | 1861846 | 1855067 | 0.999 |
| BCL2L1   | TP53     | 1848421 | 1846083 | 0.999 |

|          |          |         |         |       |
|----------|----------|---------|---------|-------|
| MDM2     | AKT1     | 1861282 | 1846136 | 0.999 |
| MTOR     | EIF4EBP1 | 1854147 | 1852358 | 0.999 |
| BRCA1    | ATM      | 1861387 | 1846577 | 0.999 |
| TGFBR1   | SMAD2    | 1856216 | 1845079 | 0.999 |
| AURKB    | BIRC5    | 1863844 | 1848314 | 0.999 |
| TP53     | KAT2B    | 1846083 | 1845408 | 0.999 |
| BCAR1    | PXN      | 1859585 | 1843137 | 0.999 |
| RPTOR    | RHEB     | 1848942 | 1845084 | 0.999 |
| EIF4EBP1 | RPTOR    | 1852358 | 1848942 | 0.999 |
| SHC1     | GRB2     | 1860266 | 1852164 | 0.999 |
| MTOR     | RPTOR    | 1854147 | 1848942 | 0.999 |
| STAT3    | EP300    | 1845584 | 1845316 | 0.999 |
| MAPK8    | ATF2     | 1853988 | 1845482 | 0.999 |
| PTK2     | PXN      | 1852426 | 1843137 | 0.999 |
| RPTOR    | RPS6KB1  | 1848942 | 1843035 | 0.999 |
| CTNND1   | CDH1     | 1858683 | 1844988 | 0.999 |
| CTNNB1   | AKT1     | 1852818 | 1846136 | 0.999 |
| VEGFA    | KDR      | 1855611 | 1845437 | 0.999 |
| SUGT1    | HSP90AA1 | 1856790 | 1851814 | 0.999 |
| TP53     | MAPK1    | 1846083 | 1842512 | 0.998 |
| MDM2     | ATM      | 1861282 | 1846577 | 0.998 |
| CASP9    | BIRC5    | 1851230 | 1848314 | 0.998 |
| MLST8    | MAPKAP1  | 1858459 | 1845827 | 0.998 |
| TLR4     | HMGB1    | 1856025 | 1852653 | 0.998 |
| ERBB2    | STAT3    | 1846101 | 1845584 | 0.998 |
| PTK2     | TP53     | 1852426 | 1846083 | 0.998 |
| BCL2L1   | AKT1     | 1848421 | 1846136 | 0.998 |
| MAPK10   | JUND     | 1853804 | 1844164 | 0.998 |
| TP53     | SMAD2    | 1846083 | 1845079 | 0.998 |
| MAPK8    | CDKN1A   | 1853988 | 1843736 | 0.998 |
| RICTOR   | RPTOR    | 1853522 | 1848942 | 0.998 |
| JUN      | MAPK1    | 1855436 | 1842512 | 0.998 |
| ATF3     | TP53     | 1852803 | 1846083 | 0.998 |
| JUN      | CDKN1A   | 1855436 | 1843736 | 0.997 |
| IKBKG    | ATM      | 1855067 | 1846577 | 0.997 |
| APAF1    | CASP3    | 1862487 | 1849375 | 0.997 |
| FOS      | MAPK1    | 1848822 | 1842512 | 0.997 |
| MAPK9    | FOS      | 1859420 | 1848822 | 0.997 |
| AKT1     | RPS6KB1  | 1846136 | 1843035 | 0.997 |
| EIF4EBP1 | RPS6KB1  | 1852358 | 1843035 | 0.997 |
| RPTOR    | AKT1     | 1848942 | 1846136 | 0.997 |
| GRB2     | KDR      | 1852164 | 1845437 | 0.997 |
| MAPK10   | ATF2     | 1853804 | 1845482 | 0.997 |
| ATF3     | ATF2     | 1852803 | 1845482 | 0.997 |
| BCL2L11  | MAPK8    | 1858084 | 1853988 | 0.997 |
| JUN      | TP53     | 1855436 | 1846083 | 0.997 |
| EGFR     | TP53     | 1846445 | 1846083 | 0.997 |
| RHEB     | RPS6KB1  | 1845084 | 1843035 | 0.997 |
| APAF1    | TP53     | 1862487 | 1846083 | 0.996 |
| IKBKB    | AKT1     | 1861846 | 1846136 | 0.996 |
| MAPK8    | BCL2L1   | 1853988 | 1848421 | 0.996 |
| STIP1    | AHSA1    | 1848791 | 1842603 | 0.996 |
| STAT1    | FOS      | 1854113 | 1848822 | 0.996 |
| MAPK8    | PXN      | 1853988 | 1843137 | 0.996 |

|          |          |         |         |       |
|----------|----------|---------|---------|-------|
| CTNND1   | CTNNB1   | 1858683 | 1852818 | 0.996 |
| SHC1     | FLT1     | 1860266 | 1846791 | 0.996 |
| FOS      | EP300    | 1848822 | 1845316 | 0.996 |
| MMP9     | JUN      | 1855661 | 1855436 | 0.996 |
| EP300    | JUND     | 1845316 | 1844164 | 0.996 |
| PXN      | MAPK1    | 1843137 | 1842512 | 0.996 |
| AKT1S1   | AKT1     | 1852495 | 1846136 | 0.996 |
| EP300    | CDKN1A   | 1845316 | 1843736 | 0.996 |
| FOS      | TP53     | 1848822 | 1846083 | 0.996 |
| KAT2B    | SMAD2    | 1845408 | 1845079 | 0.996 |
| MAPK10   | FOS      | 1853804 | 1848822 | 0.995 |
| NFE2L2   | JUN      | 1858451 | 1855436 | 0.995 |
| SHC1     | IL2      | 1860266 | 1843096 | 0.995 |
| HSP90AA1 | KDR      | 1851814 | 1845437 | 0.995 |
| MAPK3    | MAPK1    | 1845265 | 1842512 | 0.994 |
| HMGB1    | TP53     | 1852653 | 1846083 | 0.994 |
| STAT3    | CDKN1A   | 1845584 | 1843736 | 0.994 |
| BCAR1    | GRB2     | 1859585 | 1852164 | 0.994 |
| MDM2     | KAT2B    | 1861282 | 1845408 | 0.994 |
| MDM2     | CASP3    | 1861282 | 1849375 | 0.994 |
| FOXO1    | MAPK8    | 1857055 | 1853988 | 0.994 |
| JUN      | NOS3     | 1855436 | 1847875 | 0.993 |
| IGF1     | RPS6KB1  | 1848439 | 1843035 | 0.993 |
| MTOR     | STAT1    | 1854147 | 1854113 | 0.993 |
| CBL      | KDR      | 1845465 | 1845437 | 0.993 |
| ATF2     | MAPK1    | 1845482 | 1842512 | 0.993 |
| FOS      | IL2      | 1848822 | 1843096 | 0.993 |
| JUN      | IL2      | 1855436 | 1843096 | 0.993 |
| VEGFA    | IGF1     | 1855611 | 1848439 | 0.993 |
| FOXO1    | STAT3    | 1857055 | 1845584 | 0.993 |
| FOXO1    | EP300    | 1857055 | 1845316 | 0.993 |
| MAPK8    | STAT3    | 1853988 | 1845584 | 0.993 |
| MLST8    | RPS6KB1  | 1858459 | 1843035 | 0.993 |
| CASP9    | AKT1     | 1851230 | 1846136 | 0.993 |
| PTK2     | ERBB2    | 1852426 | 1846101 | 0.993 |
| FOXO1    | CTNNB1   | 1857055 | 1852818 | 0.993 |
| MAPK9    | BCL2L1   | 1859420 | 1858084 | 0.993 |
| IGFBP3   | TP53     | 1857331 | 1846083 | 0.993 |
| SHC1     | IGF1     | 1860266 | 1848439 | 0.992 |
| CASP3    | CDKN1A   | 1849375 | 1843736 | 0.992 |
| PTK2     | STAT3    | 1852426 | 1845584 | 0.992 |
| MTOR     | HSP90AA1 | 1854147 | 1851814 | 0.992 |
| CASP9    | BCL2L1   | 1851230 | 1848421 | 0.992 |
| JUN      | CTNNB1   | 1855436 | 1852818 | 0.992 |
| BRCA1    | EP300    | 1861387 | 1845316 | 0.992 |
| SHC1     | MAPK1    | 1860266 | 1842512 | 0.991 |
| MMP9     | VEGFA    | 1855661 | 1855611 | 0.991 |
| APAF1    | HSP90AA1 | 1862487 | 1851814 | 0.991 |
| ATF2     | MAPK3    | 1845482 | 1845265 | 0.991 |
| JUN      | STAT3    | 1855436 | 1845584 | 0.991 |
| FOS      | ATF2     | 1848822 | 1845482 | 0.991 |
| IL5      | IL2      | 1843289 | 1843096 | 0.991 |
| EIF4EBP1 | RHEB     | 1852358 | 1845084 | 0.991 |
| CASP3    | CDH1     | 1849375 | 1844988 | 0.991 |

|          |          |         |         |       |
|----------|----------|---------|---------|-------|
| VEGFA    | EGFR     | 1855611 | 1846445 | 0.991 |
| TP53     | MAPK3    | 1846083 | 1845265 | 0.99  |
| HSP90AA1 | MAPK1    | 1851814 | 1842512 | 0.99  |
| STAT1    | IL2      | 1854113 | 1843096 | 0.99  |
| FOS      | MAPK3    | 1848822 | 1845265 | 0.99  |
| AGT      | FOS      | 1854424 | 1848822 | 0.99  |
| FOXO1    | CDKN1A   | 1857055 | 1843736 | 0.99  |
| MAPK3    | PXN      | 1845265 | 1843137 | 0.989 |
| STAT3    | MAPK1    | 1845584 | 1842512 | 0.989 |
| BCL2L11  | JUN      | 1858084 | 1855436 | 0.989 |
| JUN      | KAT2B    | 1855436 | 1845408 | 0.989 |
| IGF2     | VEGFA    | 1859600 | 1855611 | 0.989 |
| JUN      | IL5      | 1855436 | 1843289 | 0.988 |
| MAPK8    | IL2      | 1853988 | 1843096 | 0.988 |
| MTOR     | TP53     | 1854147 | 1846083 | 0.988 |
| IGF1     | CDH1     | 1848439 | 1844988 | 0.988 |
| VEGFA    | ERBB2    | 1855611 | 1846101 | 0.988 |
| HMGB1    | KAT2B    | 1852653 | 1845408 | 0.988 |
| JUN      | STAT1    | 1855436 | 1854113 | 0.987 |
| SHC1     | PTK2     | 1860266 | 1852426 | 0.987 |
| GRB2     | AKT1     | 1852164 | 1846136 | 0.987 |
| SHC1     | AKT1     | 1860266 | 1846136 | 0.987 |
| EIF4EBP1 | MAPK1    | 1852358 | 1842512 | 0.987 |
| IGF1     | EGFR     | 1848439 | 1846445 | 0.987 |
| PTK2     | FLT1     | 1852426 | 1846791 | 0.986 |
| NOS3     | KDR      | 1847875 | 1845437 | 0.986 |
| MTOR     | EGFR     | 1854147 | 1846445 | 0.986 |
| GRB2     | MAPK1    | 1852164 | 1842512 | 0.986 |
| STIP1    | PTGES3   | 1848791 | 1845046 | 0.985 |
| MAPK3    | SMAD2    | 1845265 | 1845079 | 0.985 |
| MLST8    | RHEB     | 1858459 | 1845084 | 0.985 |
| MMP9     | LCN2     | 1855661 | 1846529 | 0.985 |
| IGFBP3   | MAPK8    | 1857331 | 1853988 | 0.984 |
| EIF4EBP1 | ATM      | 1852358 | 1846577 | 0.984 |
| SMAD2    | MAPK1    | 1845079 | 1842512 | 0.984 |
| PPARG    | IL2      | 1847090 | 1843096 | 0.984 |
| SHC1     | VEGFA    | 1860266 | 1855611 | 0.984 |
| FLT1     | KDR      | 1846791 | 1845437 | 0.983 |
| SHC1     | MAPK8    | 1860266 | 1853988 | 0.983 |
| EGFR     | CDC37    | 1846445 | 1842879 | 0.983 |
| AURKB    | TP53     | 1863844 | 1846083 | 0.982 |
| VEGFA    | AKT1     | 1855611 | 1846136 | 0.982 |
| FOS      | IL1B     | 1848822 | 1845335 | 0.981 |
| JUN      | IL1B     | 1855436 | 1845335 | 0.981 |
| TGFBR1   | CTNNB1   | 1856216 | 1852818 | 0.98  |
| BCAR1    | CBL      | 1859585 | 1845465 | 0.98  |
| STAT1    | ERBB2    | 1854113 | 1846101 | 0.98  |
| CTNNB1   | KDR      | 1852818 | 1845437 | 0.98  |
| SHC1     | AGT      | 1860266 | 1854424 | 0.98  |
| JUN      | BCL2L1   | 1855436 | 1848421 | 0.979 |
| FOXO1    | RPS6KB1  | 1857055 | 1843035 | 0.979 |
| FKBP1A   | RPTOR    | 1857423 | 1848942 | 0.978 |
| IKKBK    | HSP90AA1 | 1861846 | 1851814 | 0.978 |
| CASP3    | BIRC5    | 1849375 | 1848314 | 0.978 |

|          |          |         |         |       |
|----------|----------|---------|---------|-------|
| SUGT1    | PTGES3   | 1856790 | 1845046 | 0.978 |
| EGFR     | MAPK1    | 1846445 | 1842512 | 0.978 |
| MLST8    | AKT1     | 1858459 | 1846136 | 0.978 |
| SMAD2    | CDKN1A   | 1845079 | 1843736 | 0.978 |
| ATF2     | EP300    | 1845482 | 1845316 | 0.978 |
| CASP3    | AKT1     | 1849375 | 1846136 | 0.978 |
| MAPK9    | CTNNB1   | 1859420 | 1852818 | 0.978 |
| STAT3    | MAPK3    | 1845584 | 1845265 | 0.978 |
| AKT1     | CDC37    | 1846136 | 1842879 | 0.977 |
| JUN      | AKT1     | 1855436 | 1846136 | 0.977 |
| FOXO1    | SMAD2    | 1857055 | 1845079 | 0.977 |
| VEGFA    | HSP90AA1 | 1855611 | 1851814 | 0.977 |
| STAT1    | BCL2L1   | 1854113 | 1848421 | 0.976 |
| BCL2L1   | STAT3    | 1848421 | 1845584 | 0.976 |
| MMP9     | CDH1     | 1855661 | 1844988 | 0.976 |
| GRB2     | FLT1     | 1852164 | 1846791 | 0.976 |
| GRB2     | MAPK3    | 1852164 | 1845265 | 0.976 |
| IKBKB    | KEAP1    | 1861846 | 1842313 | 0.976 |
| PTK2     | EGFR     | 1852426 | 1846445 | 0.976 |
| EGFR     | PXN      | 1846445 | 1843137 | 0.976 |
| AKT1     | TP53     | 1846136 | 1846083 | 0.975 |
| VEGFA    | EP300    | 1855611 | 1845316 | 0.975 |
| BCAR1    | MAPK8    | 1859585 | 1853988 | 0.975 |
| STAT1    | PTK2     | 1854113 | 1852426 | 0.975 |
| CTNNB1   | BIRC5    | 1852818 | 1848314 | 0.975 |
| FOS      | STAT3    | 1848822 | 1845584 | 0.975 |
| AKT1     | STAT3    | 1846136 | 1845584 | 0.974 |
| ERBB2    | TP53     | 1846101 | 1846083 | 0.974 |
| ATM      | CDKN1A   | 1846577 | 1843736 | 0.974 |
| MTOR     | BCL2L1   | 1854147 | 1848421 | 0.973 |
| STAT1    | AKT1     | 1854113 | 1846136 | 0.973 |
| RPS6KB1  | MAPK1    | 1843035 | 1842512 | 0.973 |
| AKT1S1   | RHEB     | 1852495 | 1845084 | 0.971 |
| SHC1     | MAPK3    | 1860266 | 1845265 | 0.971 |
| MAPK8    | ATF3     | 1853988 | 1852803 | 0.97  |
| FLT1     | CBL      | 1846791 | 1845465 | 0.97  |
| HSP90AA1 | RPS6KB1  | 1851814 | 1843035 | 0.97  |
| GRB2     | STAT3    | 1852164 | 1845584 | 0.969 |
| FOXO1    | MTOR     | 1857055 | 1854147 | 0.969 |
| ATF3     | JUND     | 1852803 | 1844164 | 0.969 |
| ATM      | ATF2     | 1846577 | 1845482 | 0.968 |
| AGT      | JUND     | 1854424 | 1844164 | 0.968 |
| CTNNB1   | SMAD2    | 1852818 | 1845079 | 0.967 |
| JUN      | SMAD2    | 1855436 | 1845079 | 0.967 |
| MMP9     | MAPK8    | 1855661 | 1853988 | 0.967 |
| VEGFA    | JUN      | 1855611 | 1855436 | 0.966 |
| MAPK8    | CTNNB1   | 1853988 | 1852818 | 0.965 |
| FOS      | SMAD2    | 1848822 | 1845079 | 0.965 |
| TP53     | STAT3    | 1846083 | 1845584 | 0.965 |
| APAF1    | AKT1     | 1862487 | 1846136 | 0.965 |
| ERBB2    | CBL      | 1846101 | 1845465 | 0.964 |
| HMGB1    | MAPK1    | 1852653 | 1842512 | 0.964 |
| BIRC5    | TP53     | 1848314 | 1846083 | 0.964 |
| JUN      | EGFR     | 1855436 | 1846445 | 0.964 |

|          |          |         |         |       |
|----------|----------|---------|---------|-------|
| BRCA1    | AKT1     | 1861387 | 1846136 | 0.963 |
| IGF1     | AKT1     | 1848439 | 1846136 | 0.963 |
| STAT3    | IL2      | 1845584 | 1843096 | 0.962 |
| BCL2L11  | MAPK10   | 1858084 | 1853804 | 0.962 |
| FN1      | PXN      | 1853098 | 1843137 | 0.962 |
| VEGFA    | TP53     | 1855611 | 1846083 | 0.961 |
| TP53     | CDH1     | 1846083 | 1844988 | 0.961 |
| CTNND1   | ERBB2    | 1858683 | 1846101 | 0.961 |
| MAPK8    | MAPK1    | 1853988 | 1842512 | 0.961 |
| IL13     | IL5      | 1848685 | 1843289 | 0.961 |
| GRB2     | RPS6KB1  | 1852164 | 1843035 | 0.96  |
| VEGFA    | NOS3     | 1855611 | 1847875 | 0.96  |
| BCL2L11  | AKT1     | 1858084 | 1846136 | 0.96  |
| HSP90AA1 | STAT3    | 1851814 | 1845584 | 0.96  |
| IGFBP3   | EGFR     | 1857331 | 1846445 | 0.959 |
| FOS      | AKT1     | 1848822 | 1846136 | 0.959 |
| HSP90AA1 | BIRC5    | 1851814 | 1848314 | 0.959 |
| JUN      | NFKBIA   | 1855436 | 1842621 | 0.959 |
| MTOR     | GRB2     | 1854147 | 1852164 | 0.958 |
| MMP9     | CTNNB1   | 1855661 | 1852818 | 0.957 |
| JUN      | HMGB1    | 1855436 | 1852653 | 0.956 |
| AKT1     | IL2      | 1846136 | 1843096 | 0.956 |
| IKKBK    | TLR4     | 1861846 | 1856025 | 0.956 |
| SHC1     | MAPK9    | 1860266 | 1859420 | 0.956 |
| BCL2L1   | IL2      | 1848421 | 1843096 | 0.956 |
| GRB2     | IGF1     | 1852164 | 1848439 | 0.956 |
| BIRC5    | AKT1     | 1848314 | 1846136 | 0.956 |
| JUND     | MAPK1    | 1844164 | 1842512 | 0.955 |
| FOXO1    | MAPK10   | 1857055 | 1853804 | 0.955 |
| PTK2     | CBL      | 1852426 | 1845465 | 0.955 |
| AKT1     | CDH1     | 1846136 | 1844988 | 0.955 |
| VEGFA    | PTK2     | 1855611 | 1852426 | 0.954 |
| EZH2     | AKT1     | 1850211 | 1846136 | 0.954 |
| MTOR     | IL2      | 1854147 | 1843096 | 0.954 |
| STAT1    | TP53     | 1854113 | 1846083 | 0.954 |
| MAPK8    | PPARG    | 1853988 | 1847090 | 0.954 |
| AGT      | MAPK1    | 1854424 | 1842512 | 0.954 |
| CTNNB1   | FOS      | 1852818 | 1848822 | 0.953 |
| ATF2     | JUND     | 1845482 | 1844164 | 0.953 |
| SUGT1    | AHSA1    | 1856790 | 1842603 | 0.953 |
| MAPK8    | EP300    | 1853988 | 1845316 | 0.953 |
| MMP9     | AKT1     | 1855661 | 1846136 | 0.952 |
| MAPK9    | MAPK8    | 1859420 | 1853988 | 0.951 |
| GRB2     | IL2      | 1852164 | 1843096 | 0.951 |
| EP300    | CDH1     | 1845316 | 1844988 | 0.95  |
| SHC1     | HSP90AA1 | 1860266 | 1851814 | 0.95  |
| TLR4     | EGFR     | 1856025 | 1846445 | 0.95  |
| MAPK10   | TP53     | 1853804 | 1846083 | 0.95  |
| BCL2L11  | FOXO1    | 1858084 | 1857055 | 0.949 |
| NFE2L2   | FOS      | 1858451 | 1848822 | 0.949 |
| MAPK8    | ERBB2    | 1853988 | 1846101 | 0.949 |
| MDM2     | HSP90AA1 | 1861282 | 1851814 | 0.949 |
| STAT1    | KDR      | 1854113 | 1845437 | 0.948 |
| AGT      | TP53     | 1854424 | 1846083 | 0.948 |

|          |          |         |         |       |
|----------|----------|---------|---------|-------|
| KDR      | PXN      | 1845437 | 1843137 | 0.948 |
| AKT1     | KAT2B    | 1846136 | 1845408 | 0.948 |
| TGFBR1   | HSP90AA1 | 1856216 | 1851814 | 0.948 |
| AKT1S1   | EIF4EBP1 | 1852495 | 1852358 | 0.948 |
| CTNNB1   | IGF1     | 1852818 | 1848439 | 0.947 |
| MMP9     | EGFR     | 1855661 | 1846445 | 0.947 |
| ERBB2    | CDC37    | 1846101 | 1842879 | 0.947 |
| EIF4EBP1 | MAPK3    | 1852358 | 1845265 | 0.946 |
| AGT      | GRB2     | 1854424 | 1852164 | 0.946 |
| TLR4     | AKT1     | 1856025 | 1846136 | 0.945 |
| MAPK9    | MAPK10   | 1859420 | 1853804 | 0.945 |
| VEGFA    | STAT3    | 1855611 | 1845584 | 0.945 |
| EZH2     | STAT3    | 1850211 | 1845584 | 0.945 |
| NFE2L2   | PPARG    | 1858451 | 1847090 | 0.945 |
| FOS      | IL5      | 1848822 | 1843289 | 0.944 |
| STAT1    | MAPK3    | 1854113 | 1845265 | 0.944 |
| BCL2L1   | EGFR     | 1848421 | 1846445 | 0.944 |
| IGF1     | MAPK3    | 1848439 | 1845265 | 0.944 |
| TLR4     | IL1B     | 1856025 | 1845335 | 0.943 |
| TLR4     | STAT1    | 1856025 | 1854113 | 0.943 |
| MMP9     | TP53     | 1855661 | 1846083 | 0.942 |
| TLR4     | IKBK     | 1856025 | 1855067 | 0.942 |
| VEGFA    | PXN      | 1855611 | 1843137 | 0.942 |
| ERBB2    | CDH1     | 1846101 | 1844988 | 0.942 |
| AKT1S1   | RPS6KB1  | 1852495 | 1843035 | 0.942 |
| FOS      | EGFR     | 1848822 | 1846445 | 0.942 |
| BIRC5    | STAT3    | 1848314 | 1845584 | 0.942 |
| CBL      | IL2      | 1845465 | 1843096 | 0.942 |
| BIRC5    | EGFR     | 1848314 | 1846445 | 0.941 |
| BIRC5    | ERBB2    | 1848314 | 1846101 | 0.941 |
| HSP90AA1 | KEAP1    | 1851814 | 1842313 | 0.94  |
| PXN      | RPS6KB1  | 1843137 | 1843035 | 0.94  |
| AKT1     | RHEB     | 1846136 | 1845084 | 0.94  |
| MMP9     | NOS3     | 1855661 | 1847875 | 0.94  |
| FKBP1A   | SMAD2    | 1857423 | 1845079 | 0.94  |
| NOS3     | EP300    | 1847875 | 1845316 | 0.94  |
| NFKBIA   | MAPK1    | 1842621 | 1842512 | 0.939 |
| FOXO1    | RICTOR   | 1857055 | 1853522 | 0.939 |
| FOXH1    | EP300    | 1856663 | 1845316 | 0.939 |
| MMP9     | IL1B     | 1855661 | 1845335 | 0.939 |
| IGF2     | CTNNB1   | 1859600 | 1852818 | 0.939 |
| STAT1    | MAPK1    | 1854113 | 1842512 | 0.938 |
| VEGFA    | GRB2     | 1855611 | 1852164 | 0.938 |
| IKKB     | CDC37    | 1861846 | 1842879 | 0.938 |
| FLT1     | PXN      | 1846791 | 1843137 | 0.938 |
| JUN      | IL13     | 1855436 | 1848685 | 0.938 |
| SMAD2    | CDH1     | 1845079 | 1844988 | 0.937 |
| TLR4     | MAPK8    | 1856025 | 1853988 | 0.937 |
| IKKB     | CTNNB1   | 1861846 | 1852818 | 0.937 |
| EP300    | NFKBIA   | 1845316 | 1842621 | 0.937 |
| AGT      | NOS3     | 1854424 | 1847875 | 0.937 |
| NOS2     | NFKBIA   | 1850906 | 1842621 | 0.936 |
| JUN      | SELE     | 1855436 | 1851385 | 0.936 |
| IGF1     | PXN      | 1848439 | 1843137 | 0.935 |

|          |         |         |         |       |
|----------|---------|---------|---------|-------|
| ATF2     | KAT2B   | 1845482 | 1845408 | 0.934 |
| IGF2     | CDH1    | 1859600 | 1844988 | 0.933 |
| HSP90AA1 | IL2     | 1851814 | 1843096 | 0.933 |
| MAPK9    | IL2     | 1859420 | 1843096 | 0.933 |
| FOS      | IL13    | 1848822 | 1848685 | 0.933 |
| MAPK3    | NFKBIA  | 1845265 | 1842621 | 0.933 |
| JUN      | NOS2    | 1855436 | 1850906 | 0.933 |
| VEGFA    | FN1     | 1855611 | 1853098 | 0.932 |
| STIP1    | CDC37   | 1848791 | 1842879 | 0.931 |
| TLR4     | STAT3   | 1856025 | 1845584 | 0.931 |
| IL2      | RPS6KB1 | 1843096 | 1843035 | 0.931 |
| BCAR1    | KDR     | 1859585 | 1845437 | 0.93  |
| IGF1     | MAPK1   | 1848439 | 1842512 | 0.929 |
| HMGB1    | MAPK3   | 1852653 | 1845265 | 0.929 |
| MMP9     | STAT3   | 1855661 | 1845584 | 0.929 |
| IKBK     | CDC37   | 1855067 | 1842879 | 0.929 |
| GRB2     | IL5     | 1852164 | 1843289 | 0.929 |
| IL1B     | IL2     | 1845335 | 1843096 | 0.928 |
| FOS      | BCL2L1  | 1848822 | 1848421 | 0.928 |
| BCAR1    | VEGFA   | 1859585 | 1855611 | 0.927 |
| BCAR1    | RPS6KB1 | 1859585 | 1843035 | 0.927 |
| MMP9     | FLT1    | 1855661 | 1846791 | 0.926 |
| BIRC5    | CDKN1A  | 1848314 | 1843736 | 0.926 |
| FOXO1    | IGF1    | 1857055 | 1848439 | 0.926 |
| BCAR1    | IGF1    | 1859585 | 1848439 | 0.926 |
| IKBKB    | HMGB1   | 1861846 | 1852653 | 0.925 |
| VEGFA    | CBL     | 1855611 | 1845465 | 0.925 |
| PTK2     | KDR     | 1852426 | 1845437 | 0.925 |
| HMGB1    | NFKBIA  | 1852653 | 1842621 | 0.924 |
| IGFBP3   | EP300   | 1857331 | 1845316 | 0.924 |
| MAPK3    | IL2     | 1845265 | 1843096 | 0.923 |
| PPARG    | TP53    | 1847090 | 1846083 | 0.923 |
| IL2      | MAPK1   | 1843096 | 1842512 | 0.923 |
| JUN      | IGF1    | 1855436 | 1848439 | 0.923 |
| SHC1     | TGFBR1  | 1860266 | 1856216 | 0.923 |
| BCL2L11  | CASP3   | 1858084 | 1849375 | 0.923 |
| FOS      | IGF1    | 1848822 | 1848439 | 0.922 |
| MMP9     | ERBB2   | 1855661 | 1846101 | 0.922 |
| ATF2     | IL2     | 1845482 | 1843096 | 0.922 |
| IL1B     | EP300   | 1845335 | 1845316 | 0.922 |
| FN1      | PTK2    | 1853098 | 1852426 | 0.922 |
| BCL2L1   | ERBB2   | 1848421 | 1846101 | 0.921 |
| STAT3    | CDH1    | 1845584 | 1844988 | 0.921 |
| EZH2     | TP53    | 1850211 | 1846083 | 0.921 |
| FN1      | IGF1    | 1853098 | 1848439 | 0.921 |
| SUGT1    | CDC37   | 1856790 | 1842879 | 0.921 |
| MAPK3    | CDH1    | 1845265 | 1844988 | 0.921 |
| CASP3    | BCL2L1  | 1849375 | 1848421 | 0.921 |
| IL13     | IL2     | 1848685 | 1843096 | 0.921 |
| BCL2L11  | FOS     | 1858084 | 1848822 | 0.92  |
| CDH1     | MAPK1   | 1844988 | 1842512 | 0.92  |
| IGF2     | FN1     | 1859600 | 1853098 | 0.92  |
| IGF2     | IGF1    | 1859600 | 1848439 | 0.919 |
| MAPK9    | GRB2    | 1859420 | 1852164 | 0.919 |

|        |         |         |         |       |
|--------|---------|---------|---------|-------|
| AKT1   | SMAD2   | 1846136 | 1845079 | 0.918 |
| NOS2   | ATF2    | 1850906 | 1845482 | 0.918 |
| BCAR1  | FLT1    | 1859585 | 1846791 | 0.917 |
| MMP9   | JUND    | 1855661 | 1844164 | 0.917 |
| AKT1   | ATF2    | 1846136 | 1845482 | 0.916 |
| CBL    | PXN     | 1845465 | 1843137 | 0.916 |
| HMGB1  | ATF2    | 1852653 | 1845482 | 0.915 |
| BRCA1  | ATF2    | 1861387 | 1845482 | 0.915 |
| CASP3  | TP53    | 1849375 | 1846083 | 0.914 |
| ERBB2  | CDKN1A  | 1846101 | 1843736 | 0.914 |
| TLR4   | MMP9    | 1856025 | 1855661 | 0.913 |
| JUN    | CDH1    | 1855436 | 1844988 | 0.913 |
| NOS3   | TP53    | 1847875 | 1846083 | 0.913 |
| VEGFA  | CTNNB1  | 1855611 | 1852818 | 0.912 |
| IGF1   | STAT3   | 1848439 | 1845584 | 0.912 |
| IGF1   | NOS3    | 1848439 | 1847875 | 0.912 |
| IGFBP3 | AKT1    | 1857331 | 1846136 | 0.912 |
| MTOR   | CTNNB1  | 1854147 | 1852818 | 0.912 |
| CTNNB1 | STAT3   | 1852818 | 1845584 | 0.912 |
| IGF1   | ERBB2   | 1848439 | 1846101 | 0.912 |
| NOS3   | STAT3   | 1847875 | 1845584 | 0.91  |
| MTOR   | PPARG   | 1854147 | 1847090 | 0.909 |
| AKT1   | PTGES3  | 1846136 | 1845046 | 0.909 |
| IGF1   | KDR     | 1848439 | 1845437 | 0.909 |
| STAT1  | CDKN1A  | 1854113 | 1843736 | 0.909 |
| RPTOR  | MAPK1   | 1848942 | 1842512 | 0.909 |
| VEGFA  | PPARG   | 1855611 | 1847090 | 0.909 |
| MAPK3  | JUND    | 1845265 | 1844164 | 0.908 |
| EZH2   | CDH1    | 1850211 | 1844988 | 0.908 |
| BCAR1  | FN1     | 1859585 | 1853098 | 0.907 |
| TGFBR1 | RPS6KB1 | 1856216 | 1843035 | 0.907 |
| CTNNB1 | CASP3   | 1852818 | 1849375 | 0.906 |
| JUN    | JUND    | 1855436 | 1844164 | 0.906 |
| INCENP | CTNNB1  | 1858231 | 1852818 | 0.905 |
| CTNNB1 | FLT1    | 1852818 | 1846791 | 0.905 |
| NOS2   | NOS3    | 1850906 | 1847875 | 0.905 |
| SELE   | ATF2    | 1851385 | 1845482 | 0.903 |
| STAT3  | IL1B    | 1845584 | 1845335 | 0.903 |
| CTNND1 | IGF1    | 1858683 | 1848439 | 0.903 |
| PPARG  | IL1B    | 1847090 | 1845335 | 0.903 |
| VEGFA  | IL1B    | 1855611 | 1845335 | 0.903 |
| MTOR   | PTGES3  | 1854147 | 1845046 | 0.902 |
| FOS    | PPARG   | 1848822 | 1847090 | 0.901 |
| SHC1   | CDC37   | 1860266 | 1842879 | 0.901 |
| IKBKB  | MTOR    | 1861846 | 1854147 | 0.901 |
| MAPK8  | RPS6KB1 | 1853988 | 1843035 | 0.901 |
| FOXO1  | EGFR    | 1857055 | 1846445 | 0.901 |
| MAPK8  | MAPK10  | 1853988 | 1853804 | 0.901 |
| PTGES3 | IL2     | 1845046 | 1843096 | 0.9   |
| IGF2   | CTNND1  | 1859600 | 1858683 | 0.9   |
| SHC1   | TP53    | 1860266 | 1846083 | 0.9   |
| PTGES3 | RPS6KB1 | 1845046 | 1843035 | 0.9   |
| CCR3   | AGT     | 1862185 | 1854424 | 0.9   |
