# Supplementary material for: Pharmacological Effects of Agastache rugosa against Gastritis Using a Network Pharmacology Approach
Source: MDPI journal article supplement (doi:10.3390/biom10091298), 2020-09-09
Supplement: s1 [file s1]

Supplementary table 3. Gastritis related genes in GeneCards DB

| No. | Symbol   | Description                                                 | Category       | Gifts | GC id       | Score ▼ |
|-----|----------|-------------------------------------------------------------|----------------|-------|-------------|---------|
| 1   | IL1B     | Interleukin 1 Beta                                          | Protein Coding | 49    | GC02M112829 | 41.89   |
| 2   | IL1RN    | Interleukin 1 Receptor Antagonist                           | Protein Coding | 48    | GC02P114906 | 35.98   |
| 3   | CDH1     | Cadherin 1                                                  | Protein Coding | 50    | GC16P068737 | 31.26   |
| 4   | GAST     | Gastrin                                                     | Protein Coding | 40    | GC17P041712 | 29.27   |
| 5   | CXCL8    | C-X-C Motif Chemokine Ligand 8                              | Protein Coding | 42    | GC04P073740 | 22.11   |
| 6   | S100A8   | S100 Calcium Binding Protein A8                             | Protein Coding | 42    | GC01M153391 | 21.97   |
| 7   | TNF      | Tumor Necrosis Factor                                       | Protein Coding | 52    | GC06P033397 | 21.05   |
| 8   | PGA3     | Pepsinogen A3                                               | Protein Coding | 33    | GC11P061203 | 20.06   |
| 9   | PGA5     | Pepsinogen A5                                               | Protein Coding | 34    | GC11P061241 | 19.67   |
| 10  | PGA4     | Pepsinogen A4                                               | Protein Coding | 30    | GC11P061222 | 19.59   |
| 11  | PGC      | Progastriclin                                               | Protein Coding | 42    | GC06M041736 | 19.51   |
| 12  | AIRE     | Autoimmune Regulator                                        | Protein Coding | 45    | GC21P044285 | 19.16   |
| 13  | IL10     | Interleukin 10                                              | Protein Coding | 47    | GC01M206767 | 18.79   |
| 14  | TFF2     | Trefoil Factor 2                                            | Protein Coding | 41    | GC21M042346 | 18.43   |
| 15  | PTGS2    | Prostaglandin-Endoperoxide Synthase 2                       | Protein Coding | 48    | GC01M186640 | 18.4    |
| 16  | IL6      | Interleukin 6                                               | Protein Coding | 49    | GC07P022765 | 17.79   |
| 17  | CHGA     | Chromogranin A                                              | Protein Coding | 42    | GC14P092923 | 17.58   |
| 18  | TP53     | Tumor Protein P53                                           | Protein Coding | 53    | GC17M007661 | 17.27   |
| 19  | ATP4A    | ATPase H+/K+ Transporting Subunit Alpha                     | Protein Coding | 42    | GC19M041506 | 16.66   |
| 20  | SST      | Somatostatin                                                | Protein Coding | 42    | GC03M187668 | 16.58   |
| 21  | GHRL     | Ghrelin And Obestatin Prepropeptide                         | Protein Coding | 43    | GC03M010285 | 16.56   |
| 22  | TGFA     | Transforming Growth Factor Alpha                            | Protein Coding | 46    | GC02M070447 | 15.96   |
| 23  | KRAS     | KRAS Proto-Oncogene, GTPase                                 | Protein Coding | 50    | GC12M025204 | 15.7    |
| 24  | NOS2     | Nitric Oxide Synthase 2                                     | Protein Coding | 49    | GC17M027756 | 15.31   |
| 25  | CDX2     | Caudal Type Homeobox 2                                      | Protein Coding | 43    | GC13M027962 | 15.27   |
| 26  | ODC1     | Ornithine Decarboxylase 1                                   | Protein Coding | 47    | GC02M010432 | 15.21   |
| 27  | CAT      | Catalase                                                    | Protein Coding | 50    | GC11P034460 | 14.97   |
| 28  | ADH7     | Alcohol Dehydrogenase 7 (Class IV), Mu Or Sigma Polypeptide | Protein Coding | 44    | GC04M099412 | 14.64   |
| 29  | TLR4     | Toll Like Receptor 4                                        | Protein Coding | 50    | GC09P117704 | 14.5    |
| 30  | MUC6     | Mucin 6, Oligomeric Mucus/Gel-Forming                       | Protein Coding | 38    | GC11M001002 | 14.39   |
| 31  | CYP2C19  | Cytochrome P450 Family 2 Subfamily C Member 19              | Protein Coding | 47    | GC10P094762 | 13.84   |
| 32  | LRBA     | LPS Responsive Beige-Like Anchor Protein                    | Protein Coding | 41    | GC04M150264 | 13.79   |
| 33  | CCR6     | C-C Motif Chemokine Receptor 6                              | Protein Coding | 45    | GC06P167111 | 13.62   |
| 34  | FAS      | Fas Cell Surface Death Receptor                             | Protein Coding | 50    | GC10P088969 | 13.58   |
| 35  | FOXP3    | Forkhead Box P3                                             | Protein Coding | 46    | GC0XM049250 | 13.45   |
| 36  | IL17A    | Interleukin 17A                                             | Protein Coding | 42    | GC06P052186 | 13.18   |
| 37  | DEFB1    | Defensin Beta 1                                             | Protein Coding | 39    | GC08M006870 | 13.06   |
| 38  | NOD1     | Nucleotide Binding Oligomerization Domain Containing 1      | Protein Coding | 45    | GC07M030424 | 13.04   |
| 39  | CXCL1    | C-X-C Motif Chemokine Ligand 1                              | Protein Coding | 43    | GC04P073869 | 12.86   |
| 40  | DEFB4A   | Defensin Beta 4A                                            | Protein Coding | 36    | GC08P007895 | 12.7    |
| 41  | CCL5     | C-C Motif Chemokine Ligand 5                                | Protein Coding | 43    | GC17M035871 | 12.66   |
| 42  | HRH2     | Histamine Receptor H2                                       | Protein Coding | 43    | GC05P175659 | 12.65   |
| 43  | FASLG    | Fas Ligand                                                  | Protein Coding | 47    | GC01P172628 | 12.64   |
| 44  | MIF      | Macrophage Migration Inhibitory Factor                      | Protein Coding | 49    | GC22P023894 | 12.62   |
| 45  | PTGS1    | Prostaglandin-Endoperoxide Synthase 1                       | Protein Coding | 46    | GC09P122370 | 12.25   |
| 46  | CXCL5    | C-X-C Motif Chemokine Ligand 5                              | Protein Coding | 41    | GC04M073995 | 12      |
| 47  | DEFA5    | Defensin Alpha 5                                            | Protein Coding | 38    | GC08M007057 | 11.94   |
| 48  | SCT      | Secretin                                                    | Protein Coding | 35    | GC11M000628 | 11.86   |
| 49  | CCKBR    | Cholecystokinin B Receptor                                  | Protein Coding | 45    | GC11P006259 | 11.72   |
| 50  | AREG     | Amphiregulin                                                | Protein Coding | 43    | GC04P074445 | 11.52   |
| 51  | EGF      | Epidermal Growth Factor                                     | Protein Coding | 51    | GC04P109912 | 11.48   |
| 52  | ATP12A   | ATPase H+/K+ Transporting Non-Gastric Alpha2 Subunit        | Protein Coding | 42    | GC13P024680 | 11.45   |
| 53  | ALB      | Albumin                                                     | Protein Coding | 50    | GC04P073397 | 10.96   |
| 54  | PTGES    | Prostaglandin E Synthase                                    | Protein Coding | 41    | GC09M129738 | 10.92   |
| 55  | MALT1    | MALT1 Paracaspase                                           | Protein Coding | 47    | GC18P058671 | 10.71   |
| 56  | HLA-DRB1 | Major Histocompatibility Complex, Class II, DR Beta 1       | Protein Coding | 46    | GC06M032578 | 10.59   |
| 57  | RIPK1    | Receptor Interacting Serine/Threonine Kinase 1              | Protein Coding | 49    | GC06P003064 | 10.2    |
| 58  | MEN1     | Menin 1                                                     | Protein Coding | 46    | GC11M064803 | 9.96    |
| 59  | RUNX3    | RUNX Family Transcription Factor 3                          | Protein Coding | 43    | GC01M024899 | 9.83    |
| 60  | STAT3    | Signal Transducer And Activator Of Transcription 3          | Protein Coding | 53    | GC17M042313 | 9.78    |
| 61  | IFNGR1   | Interferon Gamma Receptor 1                                 | Protein Coding | 49    | GC06M137197 | 9.45    |
| 62  | EGFR     | Epidermal Growth Factor Receptor                            | Protein Coding | 54    | GC07P055019 | 9.42    |
| 63  | SERPINA1 | Serpin Family A Member 1                                    | Protein Coding | 49    | GC14M094376 | 9.15    |
| 64  | IL11     | Interleukin 11                                              | Protein Coding | 41    | GC19M055364 | 9.11    |
| 65  | MET      | MET Proto-Oncogene, Receptor Tyrosine Kinase                | Protein Coding | 54    | GC07P116672 | 9.03    |
| 66  | ERCC6    | ERCC Excision Repair 6, Chromatin Remodeling Factor         | Protein Coding | 45    | GC10M049454 | 8.79    |
| 67  | CTSW     | Cathepsin W                                                 | Protein Coding | 39    | GC11P065879 | 8.67    |
| 68  | IL2      | Interleukin 2                                               | Protein Coding | 46    | GC04M122451 | 8.48    |
| 69  | IL4      | Interleukin 4                                               | Protein Coding | 46    | GC05P132673 | 8.48    |
| 70  | IFNG     | Interferon Gamma                                            | Protein Coding | 48    | GC12M068064 | 8.46    |
| 71  | TFF3     | Trefoil Factor 3                                            | Protein Coding | 41    | GC21M042311 | 8.26    |
| 72  | HGF      | Hepatocyte Growth Factor                                    | Protein Coding | 52    | GC07M081699 | 8.2     |
| 73  | MIB2     | Mindbomb E3 Ubiquitin Protein Ligase 2                      | Protein Coding | 38    | GC01P001614 | 7.94    |
| 74  | PRKCD    | Protein Kinase C Delta                                      | Protein Coding | 53    | GC03P053156 | 7.88    |

|     |           |                                                                 |                |    |             |      |
|-----|-----------|-----------------------------------------------------------------|----------------|----|-------------|------|
| 75  | RASGRP1   | RAS Guanyl Releasing Protein 1                                  | Protein Coding | 46 | GC15M038488 | 7.88 |
| 76  | CASP10    | Caspase 10                                                      | Protein Coding | 48 | GC02P201182 | 7.67 |
| 77  | SKIV2L    | Ski2 Like RNA Helicase                                          | Protein Coding | 43 | GC06P031958 | 7.67 |
| 78  | TTC37     | Tetratricopeptide Repeat Domain 37                              | Protein Coding | 39 | GC05M095463 | 7.67 |
| 79  | HIP1R     | Huntingtin Interacting Protein 1 Related                        | Protein Coding | 41 | GC12P122834 | 7.49 |
| 80  | BARX1     | BARX Homeobox 1                                                 | Protein Coding | 36 | GC09M093951 | 7.49 |
| 81  | SPAG11A   | Sperm Associated Antigen 11A                                    | Protein Coding | 27 | GC08P007847 | 7.49 |
| 82  | NFKB1     | Nuclear Factor Kappa B Subunit 1                                | Protein Coding | 53 | GC04P102501 | 7.16 |
| 83  | IL2RA     | Interleukin 2 Receptor Subunit Alpha                            | Protein Coding | 50 | GC10M006010 | 7.09 |
| 84  | IL5       | Interleukin 5                                                   | Protein Coding | 45 | GC05M132541 | 6.99 |
| 85  | GZMB      | Granzyme B                                                      | Protein Coding | 45 | GC14M024630 | 6.88 |
| 86  | CBLIF     | Cobalamin Binding Intrinsic Factor                              | Protein Coding | 34 | GC11M059829 | 6.78 |
| 87  | CTNNA1    | Catenin Alpha 1                                                 | Protein Coding | 47 | GC05P138613 | 6.53 |
| 88  | PTPN11    | Protein Tyrosine Phosphatase Non-Receptor Type 11               | Protein Coding | 53 | GC12P112418 | 6.41 |
| 89  | MAP3K6    | Mitogen-Activated Protein Kinase Kinase Kinase 6                | Protein Coding | 42 | GC01M027365 | 6.12 |
| 90  | AGK       | Acylglycerol Kinase                                             | Protein Coding | 41 | GC07P141551 | 6.12 |
| 91  | CD4       | CD4 Molecule                                                    | Protein Coding | 50 | GC12P006786 | 6.03 |
| 92  | TIMP1     | TIMP Metalloproteinase Inhibitor 1                              | Protein Coding | 45 | GC0XP047583 | 5.83 |
| 93  | CEL       | Carboxyl Ester Lipase                                           | Protein Coding | 46 | GC09P133061 | 5.73 |
| 94  | MUC2      | Mucin 2, Oligomeric Mucus/Gel-Forming                           | Protein Coding | 39 | GC11P001074 | 5.64 |
| 95  | CCK       | Cholecystokinin                                                 | Protein Coding | 41 | GC03M042274 | 5.56 |
| 96  | MIR146A   | MicroRNA 146a                                                   | RNA Gene       | 21 | GC05P160485 | 5.54 |
| 97  | GAD2      | Glutamate Decarboxylase 2                                       | Protein Coding | 46 | GC10P026216 | 5.5  |
| 98  | IL13      | Interleukin 13                                                  | Protein Coding | 45 | GC05P132656 | 5.37 |
| 99  | JUN       | Jun Proto-Oncogene, AP-1 Transcription Factor Subunit           | Protein Coding | 49 | GC01M058780 | 5.31 |
| 100 | MIR27A    | MicroRNA 27a                                                    | RNA Gene       | 20 | GC19M013987 | 5.31 |
| 101 | CD8A      | CD8a Molecule                                                   | Protein Coding | 47 | GC02M086784 | 5.3  |
| 102 | PDIA3     | Protein Disulfide Isomerase Family A Member 3                   | Protein Coding | 45 | GC15P043746 | 5.3  |
| 103 | PLA2G5    | Phospholipase A2 Group V                                        | Protein Coding | 43 | GC01P020028 | 5.3  |
| 104 | RFXANK    | Regulatory Factor X Associated Ankyrin Containing Protein       | Protein Coding | 42 | GC19P019192 | 5.3  |
| 105 | GPSM2     | G Protein Signaling Modulator 2                                 | Protein Coding | 41 | GC01P108875 | 5.3  |
| 106 | PES1      | Pescadillo Ribosomal Biogenesis Factor 1                        | Protein Coding | 38 | GC22M030576 | 5.3  |
| 107 | TTI1      | TELO2 Interacting Protein 1                                     | Protein Coding | 36 | GC20M037983 | 5.3  |
| 108 | COPG2IT1  | COPG2 Imprinted Transcript 1                                    | RNA Gene       | 11 | GC07P130543 | 5.3  |
| 109 | AICDA     | Activation Induced Cytidine Deaminase                           | Protein Coding | 46 | GC12M008602 | 5.24 |
| 110 | HLA-DQA1  | Major Histocompatibility Complex, Class II, DQ Alpha 1          | Protein Coding | 43 | GC06P033442 | 5.2  |
| 111 | FUT2      | Fucosyltransferase 2                                            | Protein Coding | 43 | GC19P048695 | 5.2  |
| 112 | CD40LG    | CD40 Ligand                                                     | Protein Coding | 47 | GC0XP136649 | 5.13 |
| 113 | CCR3      | C-C Motif Chemokine Receptor 3                                  | Protein Coding | 47 | GC03P046227 | 5.06 |
| 114 | ENTPD1    | Ectonucleoside Triphosphate Diphosphohydrolase 1                | Protein Coding | 46 | GC10P095711 | 4.97 |
| 115 | BCL2L11   | BCL2 Like 11                                                    | Protein Coding | 45 | GC02P111119 | 4.97 |
| 116 | MIR142    | MicroRNA 142                                                    | RNA Gene       | 17 | GC17M058331 | 4.97 |
| 117 | SPP1      | Secreted Phosphoprotein 1                                       | Protein Coding | 46 | GC04P087975 | 4.92 |
| 118 | TNFSF13B  | TNF Superfamily Member 13b                                      | Protein Coding | 45 | GC13P108251 | 4.92 |
| 119 | TIA1      | TIA1 Cytotoxic Granule Associated RNA Binding Protein           | Protein Coding | 42 | GC02M070209 | 4.92 |
| 120 | SH2D1A    | SH2 Domain Containing 1A                                        | Protein Coding | 46 | GC0XP124227 | 4.86 |
| 121 | MIRLET7A1 | MicroRNA Let-7a-1                                               | RNA Gene       | 19 | GC09P094175 | 4.86 |
| 122 | GAD1      | Glutamate Decarboxylase 1                                       | Protein Coding | 51 | GC02P170813 | 4.77 |
| 123 | CASP3     | Caspase 3                                                       | Protein Coding | 50 | GC04M184627 | 4.74 |
| 124 | CTLA4     | Cytotoxic T-Lymphocyte Associated Protein 4                     | Protein Coding | 46 | GC02P203867 | 4.74 |
| 125 | HLA-A     | Major Histocompatibility Complex, Class I, A                    | Protein Coding | 46 | GC06P033211 | 4.71 |
| 126 | HLA-B     | Major Histocompatibility Complex, Class I, B                    | Protein Coding | 45 | GC06M031289 | 4.71 |
| 127 | HLA-C     | Major Histocompatibility Complex, Class I, C                    | Protein Coding | 44 | GC06M031272 | 4.71 |
| 128 | TGFB1     | Transforming Growth Factor Beta 1                               | Protein Coding | 52 | GC19M041301 | 4.69 |
| 129 | MMP7      | Matrix Metalloproteinase 7                                      | Protein Coding | 48 | GC11M102425 | 4.63 |
| 130 | MPO       | Myeloperoxidase                                                 | Protein Coding | 50 | GC17M058269 | 4.62 |
| 131 | MUC5AC    | Mucin 5AC, Oligomeric Mucus/Gel-Forming                         | Protein Coding | 39 | GC11P001151 | 4.54 |
| 132 | CHUK      | Component Of Inhibitor Of Nuclear Factor Kappa B Kinase Complex | Protein Coding | 51 | GC10M100188 | 4.53 |
| 133 | NFKBIA    | NFKB Inhibitor Alpha                                            | Protein Coding | 50 | GC14M035401 | 4.53 |
| 134 | PAK1      | P21 (RAC1) Activated Kinase 1                                   | Protein Coding | 47 | GC11M077321 | 4.53 |
| 135 | COX5A     | Cytochrome C Oxidase Subunit 5A                                 | Protein Coding | 43 | GC15M074919 | 4.51 |
| 136 | TH        | Tyrosine Hydroxylase                                            | Protein Coding | 52 | GC11M002163 | 4.33 |
| 137 | DDC       | Dopa Decarboxylase                                              | Protein Coding | 52 | GC07M050458 | 4.33 |
| 138 | ADAM10    | ADAM Metalloproteinase Domain 10                                | Protein Coding | 52 | GC15M058588 | 4.33 |
| 139 | CASR      | Calcium Sensing Receptor                                        | Protein Coding | 50 | GC03P122183 | 4.33 |
| 140 | CYP11A1   | Cytochrome P450 Family 11 Subfamily A Member 1                  | Protein Coding | 49 | GC15M074337 | 4.33 |
| 141 | CYP17A1   | Cytochrome P450 Family 17 Subfamily A Member 1                  | Protein Coding | 49 | GC10M102830 | 4.33 |
| 142 | GPD2      | Glycerol-3-Phosphate Dehydrogenase 2                            | Protein Coding | 46 | GC02P156435 | 4.33 |
| 143 | PSAP      | Prosaposin                                                      | Protein Coding | 46 | GC10M071816 | 4.33 |
| 144 | VDAC1     | Voltage Dependent Anion Channel 1                               | Protein Coding | 46 | GC05M133975 | 4.33 |
| 145 | CD28      | CD28 Molecule                                                   | Protein Coding | 46 | GC02P203706 | 4.33 |
| 146 | CYP1A2    | Cytochrome P450 Family 1 Subfamily A Member 2                   | Protein Coding | 45 | GC15P074748 | 4.33 |
| 147 | CYP21A2   | Cytochrome P450 Family 21 Subfamily A Member 2                  | Protein Coding | 45 | GC06P033435 | 4.33 |
| 148 | TFAM      | Transcription Factor A, Mitochondrial                           | Protein Coding | 43 | GC10P058385 | 4.33 |
| 149 | TPH1      | Tryptophan Hydroxylase 1                                        | Protein Coding | 43 | GC11M018040 | 4.33 |
| 150 | CCL11     | C-C Motif Chemokine Ligand 11                                   | Protein Coding | 43 | GC17P034285 | 4.33 |
| 151 | EPX       | Eosinophil Peroxidase                                           | Protein Coding | 42 | GC17P058192 | 4.33 |

|     |          |                                                                     |                |    |             |      |
|-----|----------|---------------------------------------------------------------------|----------------|----|-------------|------|
| 152 | GNPTAB   | N-Acetylglucosamine-1-Phosphate Transferase Subunits Alpha And Beta | Protein Coding | 41 | GC12M101745 | 4.33 |
| 153 | TCN1     | Transcobalamin 1                                                    | Protein Coding | 40 | GC11M060026 | 4.33 |
| 154 | SIGLEC8  | Sialic Acid Binding Ig Like Lectin 8                                | Protein Coding | 38 | GC19M051450 | 4.33 |
| 155 | ICOSLG   | Inducible T Cell Costimulator Ligand                                | Protein Coding | 38 | GC21M044222 | 4.33 |
| 156 | CCL26    | C-C Motif Chemokine Ligand 26                                       | Protein Coding | 38 | GC07M075769 | 4.33 |
| 157 | FIP1L1   | Factor Interacting With PAPOLA And CPSF1                            | Protein Coding | 38 | GC04P053383 | 4.33 |
| 158 | NDUFB1   | NADH:Ubiquinone Oxidoreductase Subunit B1                           | Protein Coding | 38 | GC14M092116 | 4.33 |
| 159 | RNASE2   | Ribonuclease A Family Member 2                                      | Protein Coding | 38 | GC14P021144 | 4.33 |
| 160 | TRAPPC10 | Trafficking Protein Particle Complex 10                             | Protein Coding | 37 | GC21P044012 | 4.33 |
| 161 | CCL24    | C-C Motif Chemokine Ligand 24                                       | Protein Coding | 36 | GC07M075811 | 4.33 |
| 162 | CDH26    | Cadherin 26                                                         | Protein Coding | 35 | GC20P059958 | 4.33 |
| 163 | NDUFC1   | NADH:Ubiquinone Oxidoreductase Subunit C1                           | Protein Coding | 35 | GC04M139267 | 4.33 |
| 164 | SQOR     | Sulfide Quinone Oxidoreductase                                      | Protein Coding | 28 | GC15P045632 | 4.33 |
| 165 | H2AC18   | H2A Clustered Histone 18                                            | Protein Coding | 26 | GC01M149914 | 4.33 |
| 166 | MIR21    | MicroRNA 21                                                         | RNA Gene       | 21 | GC17P059841 | 4.33 |
| 167 | MLH1     | MutL Homolog 1                                                      | Protein Coding | 47 | GC03P036993 | 4.29 |
| 168 | MUC1     | Mucin 1, Cell Surface Associated                                    | Protein Coding | 47 | GC01M155185 | 4.28 |
| 169 | HRAS     | HRas Proto-Oncogene, GTPase                                         | Protein Coding | 52 | GC11M000522 | 4.1  |
| 170 | MIR29C   | MicroRNA 29c                                                        | RNA Gene       | 16 | GC01M207802 | 4.05 |
| 171 | HSPD1    | Heat Shock Protein Family D (Hsp60) Member 1                        | Protein Coding | 47 | GC02M197486 | 4.01 |
| 172 | MIR181C  | MicroRNA 181c                                                       | RNA Gene       | 18 | GC19P013876 | 4.01 |
| 173 | SOD1     | Superoxide Dismutase 1                                              | Protein Coding | 52 | GC21P031659 | 3.95 |
| 174 | CDKN2A   | Cyclin Dependent Kinase Inhibitor 2A                                | Protein Coding | 51 | GC09M021967 | 3.94 |
| 175 | HDC      | Histidine Decarboxylase                                             | Protein Coding | 45 | GC15M050241 | 3.91 |
| 176 | PTPN3    | Protein Tyrosine Phosphatase Non-Receptor Type 3                    | Protein Coding | 44 | GC09M109375 | 3.91 |
| 177 | BCL2     | BCL2 Apoptosis Regulator                                            | Protein Coding | 52 | GC18M063123 | 3.89 |
| 178 | MMP9     | Matrix Metallopeptidase 9                                           | Protein Coding | 53 | GC20P046008 | 3.88 |
| 179 | MIR24-1  | MicroRNA 24-1                                                       | RNA Gene       | 17 | GC09P095086 | 3.86 |
| 180 | MTOR     | Mechanistic Target Of Rapamycin Kinase                              | Protein Coding | 53 | GC01M011106 | 3.79 |
| 181 | TG       | Thyroglobulin                                                       | Protein Coding | 43 | GC08P132866 | 3.79 |
| 182 | MIR150   | MicroRNA 150                                                        | RNA Gene       | 20 | GC19M049500 | 3.79 |
| 183 | GSTP1    | Glutathione S-Transferase Pi 1                                      | Protein Coding | 49 | GC11P067583 | 3.75 |
| 184 | TPO      | Thyroid Peroxidase                                                  | Protein Coding | 48 | GC02P001374 | 3.71 |
| 185 | F2       | Coagulation Factor II, Thrombin                                     | Protein Coding | 48 | GC11P046720 | 3.71 |
| 186 | HSPG2    | Heparan Sulfate Proteoglycan 2                                      | Protein Coding | 47 | GC01M021822 | 3.71 |
| 187 | CRP      | C-Reactive Protein                                                  | Protein Coding | 46 | GC01M159715 | 3.71 |
| 188 | ITGAE    | Integrin Subunit Alpha E                                            | Protein Coding | 39 | GC17M003722 | 3.71 |
| 189 | MIR106A  | MicroRNA 106a                                                       | RNA Gene       | 16 | GC0XM134249 | 3.71 |
| 190 | MGMT     | O-6-Methylguanine-DNA Methyltransferase                             | Protein Coding | 49 | GC10P129467 | 3.54 |
| 191 | MMP2     | Matrix Metallopeptidase 2                                           | Protein Coding | 53 | GC16P055390 | 3.51 |
| 192 | ALPP     | Alkaline Phosphatase, Placental                                     | Protein Coding | 45 | GC02P232378 | 3.5  |
| 193 | MUC4     | Mucin 4, Cell Surface Associated                                    | Protein Coding | 39 | GC03M195746 | 3.5  |
| 194 | KRT7     | Keratin 7                                                           | Protein Coding | 42 | GC12P052232 | 3.48 |
| 195 | PCNA     | Proliferating Cell Nuclear Antigen                                  | Protein Coding | 51 | GC20M005114 | 3.44 |
| 196 | HLA-DQB1 | Major Histocompatibility Complex, Class II, DQ Beta 1               | Protein Coding | 44 | GC06M032660 | 3.43 |
| 197 | LEP      | Leptin                                                              | Protein Coding | 47 | GC07P128241 | 3.42 |
| 198 | CASP8    | Caspase 8                                                           | Protein Coding | 52 | GC02P201233 | 3.42 |
| 199 | CD69     | CD69 Molecule                                                       | Protein Coding | 41 | GC12M013363 | 3.42 |
| 200 | IL7R     | Interleukin 7 Receptor                                              | Protein Coding | 47 | GC05P035852 | 3.35 |
| 201 | MIR9-1   | MicroRNA 9-1                                                        | RNA Gene       | 19 | GC01M156420 | 3.35 |
| 202 | MIR200B  | MicroRNA 200b                                                       | RNA Gene       | 18 | GC01P001167 | 3.35 |
| 203 | MIR25    | MicroRNA 25                                                         | RNA Gene       | 17 | GC07M100093 | 3.35 |
| 204 | MIR30A   | MicroRNA 30a                                                        | RNA Gene       | 17 | GC06M071403 | 3.35 |
| 205 | MIR129-1 | MicroRNA 129-1                                                      | RNA Gene       | 16 | GC07P128207 | 3.35 |
| 206 | TNFRSF1A | TNF Receptor Superfamily Member 1A                                  | Protein Coding | 49 | GC12M006328 | 3.26 |
| 207 | TNFAIP3  | TNF Alpha Induced Protein 3                                         | Protein Coding | 47 | GC06P137866 | 3.26 |
| 208 | CFLAR    | CASP8 And FADD Like Apoptosis Regulator                             | Protein Coding | 46 | GC02P201117 | 3.26 |
| 209 | STAT5A   | Signal Transducer And Activator Of Transcription 5A                 | Protein Coding | 46 | GC17P042287 | 3.26 |
| 210 | PTPN22   | Protein Tyrosine Phosphatase Non-Receptor Type 22                   | Protein Coding | 46 | GC01M113813 | 3.26 |
| 211 | MTR      | 5-Methyltetrahydrofolate-Homocysteine Methyltransferase             | Protein Coding | 46 | GC01P236795 | 3.26 |
| 212 | TCN2     | Transcobalamin 2                                                    | Protein Coding | 43 | GC22P030606 | 3.26 |
| 213 | SERPINA3 | Serpin Family A Member 3                                            | Protein Coding | 43 | GC14P094612 | 3.26 |
| 214 | HNRNPC   | Heterogeneous Nuclear Ribonucleoprotein C                           | Protein Coding | 41 | GC14M021210 | 3.26 |
| 215 | MIR221   | MicroRNA 221                                                        | RNA Gene       | 19 | GC0XM045746 | 3.26 |
| 216 | MIR92A1  | MicroRNA 92a-1                                                      | RNA Gene       | 17 | GC13P091420 | 3.26 |
| 217 | SOD2     | Superoxide Dismutase 2                                              | Protein Coding | 50 | GC06M159669 | 3.16 |
| 218 | MDM2     | MDM2 Proto-Oncogene                                                 | Protein Coding | 53 | GC12P068808 | 3.09 |
| 219 | STAT1    | Signal Transducer And Activator Of Transcription 1                  | Protein Coding | 53 | GC02M190964 | 3.06 |
| 220 | PTPRC    | Protein Tyrosine Phosphatase Receptor Type C                        | Protein Coding | 51 | GC01P198607 | 3.06 |
| 221 | JAK1     | Janus Kinase 1                                                      | Protein Coding | 50 | GC01M064833 | 3.06 |
| 222 | NRAS     | NRAS Proto-Oncogene, GTPase                                         | Protein Coding | 50 | GC01M114704 | 3.06 |
| 223 | CBL      | Cbl Proto-Oncogene                                                  | Protein Coding | 50 | GC11P119206 | 3.06 |
| 224 | ALPL     | Alkaline Phosphatase, Biom mineralization Associated                | Protein Coding | 50 | GC01P021508 | 3.06 |
| 225 | BMPR2    | Bone Morphogenetic Protein Receptor Type 2                          | Protein Coding | 50 | GC02P202376 | 3.06 |
| 226 | STAT5B   | Signal Transducer And Activator Of Transcription 5B                 | Protein Coding | 49 | GC17M042199 | 3.06 |
| 227 | CD19     | CD19 Molecule                                                       | Protein Coding | 49 | GC16P028943 | 3.06 |
| 228 | ACVRL1   | Activin A Receptor Like Type 1                                      | Protein Coding | 49 | GC12P051906 | 3.06 |

|     |          |                                                                    |                |    |             |      |
|-----|----------|--------------------------------------------------------------------|----------------|----|-------------|------|
| 229 | TGM2     | Transglutaminase 2                                                 | Protein Coding | 48 | GC20M038127 | 3.06 |
| 230 | ACTA2    | Actin Alpha 2, Smooth Muscle                                       | Protein Coding | 47 | GC10M088935 | 3.06 |
| 231 | FADD     | Fas Associated Via Death Domain                                    | Protein Coding | 47 | GC11P070203 | 3.06 |
| 232 | HDAC9    | Histone Deacetylase 9                                              | Protein Coding | 46 | GC07P018086 | 3.06 |
| 233 | PPT1     | Palmitoyl-Protein Thioesterase 1                                   | Protein Coding | 46 | GC01M040072 | 3.06 |
| 234 | TBX21    | T-Box Transcription Factor 21                                      | Protein Coding | 46 | GC17P047733 | 3.06 |
| 235 | SERPINH1 | Serpin Family H Member 1                                           | Protein Coding | 46 | GC11P075562 | 3.06 |
| 236 | ARF1     | ADP Ribosylation Factor 1                                          | Protein Coding | 46 | GC01P228082 | 3.06 |
| 237 | FST      | Follistatin                                                        | Protein Coding | 46 | GC05P053480 | 3.06 |
| 238 | ADAMTS13 | ADAM Metallopeptidase With Thrombospondin Type 1 Motif 13          | Protein Coding | 46 | GC09P133414 | 3.06 |
| 239 | CR1      | Complement C3b/C4b Receptor 1 (Knops Blood Group)                  | Protein Coding | 45 | GC01P207496 | 3.06 |
| 240 | PRF1     | Perforin 1                                                         | Protein Coding | 45 | GC10M070597 | 3.06 |
| 241 | IL10RA   | Interleukin 10 Receptor Subunit Alpha                              | Protein Coding | 45 | GC11P117987 | 3.06 |
| 242 | SNRPN    | Small Nuclear Ribonucleoprotein Polypeptide N                      | Protein Coding | 45 | GC15P024823 | 3.06 |
| 243 | CD27     | CD27 Molecule                                                      | Protein Coding | 45 | GC12P006608 | 3.06 |
| 244 | MATK     | Megakaryocyte-Associated Tyrosine Kinase                           | Protein Coding | 45 | GC19M003777 | 3.06 |
| 245 | APOH     | Apolipoprotein H                                                   | Protein Coding | 44 | GC17M066212 | 3.06 |
| 246 | NLRP1    | NLR Family Pyrin Domain Containing 1                               | Protein Coding | 44 | GC17M005499 | 3.06 |
| 247 | TNFRSF18 | TNF Receptor Superfamily Member 18                                 | Protein Coding | 43 | GC01M001203 | 3.06 |
| 248 | TOR1A    | Torsin Family 1 Member A                                           | Protein Coding | 43 | GC09M129812 | 3.06 |
| 249 | UNC13D   | Unc-13 Homolog D                                                   | Protein Coding | 43 | GC17M075827 | 3.06 |
| 250 | PTPN5    | Protein Tyrosine Phosphatase Non-Receptor Type 5                   | Protein Coding | 43 | GC11M018727 | 3.06 |
| 251 | GYPC     | Glycophorin C (Gerbich Blood Group)                                | Protein Coding | 43 | GC02P126655 | 3.06 |
| 252 | PDE6D    | Phosphodiesterase 6D                                               | Protein Coding | 43 | GC02M231732 | 3.06 |
| 253 | FOXP2    | Forkhead Box P2                                                    | Protein Coding | 43 | GC07P114086 | 3.06 |
| 254 | RIPK3    | Receptor Interacting Serine/Threonine Kinase 3                     | Protein Coding | 43 | GC14M024336 | 3.06 |
| 255 | ALPI     | Alkaline Phosphatase, Intestinal                                   | Protein Coding | 43 | GC02P232456 | 3.06 |
| 256 | FAF1     | Fas Associated Factor 1                                            | Protein Coding | 43 | GC01M050439 | 3.06 |
| 257 | TIMM8A   | Translocase Of Inner Mitochondrial Membrane 8A                     | Protein Coding | 42 | GC0XM101345 | 3.06 |
| 258 | TRIP11   | Thyroid Hormone Receptor Interactor 11                             | Protein Coding | 42 | GC14M091965 | 3.06 |
| 259 | NUP107   | Nucleoporin 107                                                    | Protein Coding | 42 | GC12P068686 | 3.06 |
| 260 | ARFGAP1  | ADP Ribosylation Factor GTPase Activating Protein 1                | Protein Coding | 42 | GC20P063272 | 3.06 |
| 261 | DOCK8    | Dedicator Of Cytokinesis 8                                         | Protein Coding | 42 | GC09P000214 | 3.06 |
| 262 | MLKL     | Mixed Lineage Kinase Domain Like Pseudokinase                      | Protein Coding | 41 | GC16M074672 | 3.06 |
| 263 | NT5C     | 5', 3'-Nucleotidase, Cytosolic                                     | Protein Coding | 41 | GC17M075130 | 3.06 |
| 264 | NUP133   | Nucleoporin 133                                                    | Protein Coding | 41 | GC01M229441 | 3.06 |
| 265 | CD68     | CD68 Molecule                                                      | Protein Coding | 40 | GC17P007579 | 3.06 |
| 266 | NUP85    | Nucleoporin 85                                                     | Protein Coding | 40 | GC17P075205 | 3.06 |
| 267 | ARFGAP3  | ADP Ribosylation Factor GTPase Activating Protein 3                | Protein Coding | 40 | GC22M042796 | 3.06 |
| 268 | CLPS     | Colipase                                                           | Protein Coding | 40 | GC06M041294 | 3.06 |
| 269 | HNRNPDL  | Heterogeneous Nuclear Ribonucleoprotein D Like                     | Protein Coding | 39 | GC04M082422 | 3.06 |
| 270 | NUP160   | Nucleoporin 160                                                    | Protein Coding | 39 | GC11M059719 | 3.06 |
| 271 | SMTN     | Smoothelin                                                         | Protein Coding | 39 | GC22P031066 | 3.06 |
| 272 | SNRNP70  | Small Nuclear Ribonucleoprotein U1 Subunit 70                      | Protein Coding | 39 | GC19P049085 | 3.06 |
| 273 | SNRPA    | Small Nuclear Ribonucleoprotein Polypeptide A                      | Protein Coding | 39 | GC19P040750 | 3.06 |
| 274 | IFI30    | IFI30 Lysosomal Thiol Reductase                                    | Protein Coding | 39 | GC19P018173 | 3.06 |
| 275 | PIR      | Pirin                                                              | Protein Coding | 39 | GC0XM015402 | 3.06 |
| 276 | LSM2     | LSM2 Homolog, U6 Small Nuclear RNA And mRNA Degradation Associated | Protein Coding | 39 | GC06M032380 | 3.06 |
| 277 | MAGT1    | Magnesium Transporter 1                                            | Protein Coding | 39 | GC0XM077826 | 3.06 |
| 278 | CHMP2A   | Charged Multivesicular Body Protein 2A                             | Protein Coding | 38 | GC19M058551 | 3.06 |
| 279 | RAB3IL1  | RAB3A Interacting Protein Like 1                                   | Protein Coding | 37 | GC11M061897 | 3.06 |
| 280 | LAG3     | Lymphocyte Activating 3                                            | Protein Coding | 37 | GC12P006857 | 3.06 |
| 281 | NUP37    | Nucleoporin 37                                                     | Protein Coding | 37 | GC12M102073 | 3.06 |
| 282 | C1QTNF6  | C1q And TNF Related 6                                              | Protein Coding | 37 | GC22M037180 | 3.06 |
| 283 | DDX21    | DExD-Box Helicase 21                                               | Protein Coding | 37 | GC10P068956 | 3.06 |
| 284 | ACKR1    | Atypical Chemokine Receptor 1 (Duffy Blood Group)                  | Protein Coding | 37 | GC01P159203 | 3.06 |
| 285 | PRSS27   | Serine Protease 27                                                 | Protein Coding | 36 | GC16M002713 | 3.06 |
| 286 | PAM16    | Presequence Translocase Associated Motor 16                        | Protein Coding | 36 | GC16M004332 | 3.06 |
| 287 | SNRPD3   | Small Nuclear Ribonucleoprotein D3 Polypeptide                     | Protein Coding | 36 | GC22P024555 | 3.06 |
| 288 | ARFGAP2  | ADP Ribosylation Factor GTPase Activating Protein 2                | Protein Coding | 36 | GC11M059684 | 3.06 |
| 289 | AHCTF1   | AT-Hook Containing Transcription Factor 1                          | Protein Coding | 36 | GC01M246840 | 3.06 |
| 290 | ANKRD49  | Ankyrin Repeat Domain 49                                           | Protein Coding | 36 | GC11P094493 | 3.06 |
| 291 | MMD      | Monocyte To Macrophage Differentiation Associated                  | Protein Coding | 35 | GC17M055392 | 3.06 |
| 292 | VILL     | Villin Like                                                        | Protein Coding | 35 | GC03P037989 | 3.06 |
| 293 | RNPC3    | RNA Binding Region (RNP1, RRM) Containing 3                        | Protein Coding | 35 | GC01P103525 | 3.06 |
| 294 | MUC3A    | Mucin 3A, Cell Surface Associated                                  | Protein Coding | 35 | GC07P100949 | 3.06 |
| 295 | NUP43    | Nucleoporin 43                                                     | Protein Coding | 34 | GC06M149724 | 3.06 |
| 296 | NUDT10   | Nudix Hydrolase 10                                                 | Protein Coding | 34 | GC0XP051332 | 3.06 |
| 297 | MAS1L    | MAS1 Proto-Oncogene Like, G Protein-Coupled Receptor               | Protein Coding | 34 | GC06M029519 | 3.06 |
| 298 | MT-CO1   | Mitochondrially Encoded Cytochrome C Oxidase I                     | Protein Coding | 34 | GCMTPO05906 | 3.06 |
| 299 | ZNF740   | Zinc Finger Protein 740                                            | Protein Coding | 33 | GC12P053180 | 3.06 |
| 300 | MT-CYB   | Mitochondrially Encoded Cytochrome B                               | Protein Coding | 32 | GCMTPO14749 | 3.06 |
| 301 | ALPG     | Alkaline Phosphatase, Germ Cell                                    | Protein Coding | 32 | GC02P232407 | 3.06 |
| 302 | GET1     | Guided Entry Of Tail-Anchored Proteins Factor 1                    | Protein Coding | 26 | GC21P039377 | 3.06 |
| 303 | MIR34A   | MicroRNA 34a                                                       | RNA Gene       | 20 | GC01M009151 | 3.06 |
| 304 | MIR16-1  | MicroRNA 16-1                                                      | RNA Gene       | 20 | GC13M050048 | 3.06 |
| 305 | MIR143   | MicroRNA 143                                                       | RNA Gene       | 20 | GC05P149410 | 3.06 |

|     |            |                                                  |                |    |             |      |
|-----|------------|--------------------------------------------------|----------------|----|-------------|------|
| 306 | MIR145     | MicroRNA 145                                     | RNA Gene       | 20 | GC05P149430 | 3.06 |
| 307 | MIR126     | MicroRNA 126                                     | RNA Gene       | 20 | GC09P136670 | 3.06 |
| 308 | MIR34C     | MicroRNA 34c                                     | RNA Gene       | 19 | GC11P111579 | 3.06 |
| 309 | MIR192     | MicroRNA 192                                     | RNA Gene       | 19 | GC11M064891 | 3.06 |
| 310 | MIR99A     | MicroRNA 99a                                     | RNA Gene       | 19 | GC21P016539 | 3.06 |
| 311 | MIR10B     | MicroRNA 10b                                     | RNA Gene       | 19 | GC02P176150 | 3.06 |
| 312 | MIR17      | MicroRNA 17                                      | RNA Gene       | 19 | GC13P091350 | 3.06 |
| 313 | MIR122     | MicroRNA 122                                     | RNA Gene       | 19 | GC18P058451 | 3.06 |
| 314 | MIR124-1   | MicroRNA 124-1                                   | RNA Gene       | 19 | GC08M009903 | 3.06 |
| 315 | MIR29A     | MicroRNA 29a                                     | RNA Gene       | 19 | GC07M130876 | 3.06 |
| 316 | MIR29B1    | MicroRNA 29b-1                                   | RNA Gene       | 19 | GC07M130877 | 3.06 |
| 317 | LINC01554  | Long Intergenic Non-Protein Coding RNA 1554      | RNA Gene       | 19 | GC05P095838 | 3.06 |
| 318 | MIR185     | MicroRNA 185                                     | RNA Gene       | 19 | GC22P020034 | 3.06 |
| 319 | MIR200A    | MicroRNA 200a                                    | RNA Gene       | 19 | GC01P001296 | 3.06 |
| 320 | MIR140     | MicroRNA 140                                     | RNA Gene       | 19 | GC16P069934 | 3.06 |
| 321 | MIR125A    | MicroRNA 125a                                    | RNA Gene       | 19 | GC19P051723 | 3.06 |
| 322 | MIR125B1   | MicroRNA 125b-1                                  | RNA Gene       | 19 | GC11M122100 | 3.06 |
| 323 | MIR149     | MicroRNA 149                                     | RNA Gene       | 19 | GC02P240456 | 3.06 |
| 324 | MIR30E     | MicroRNA 30e                                     | RNA Gene       | 19 | GC01P040754 | 3.06 |
| 325 | MIR93      | MicroRNA 93                                      | RNA Gene       | 18 | GC07M100246 | 3.06 |
| 326 | MIR373     | MicroRNA 373                                     | RNA Gene       | 18 | GC19P054121 | 3.06 |
| 327 | MIR23A     | MicroRNA 23a                                     | RNA Gene       | 18 | GC19M013988 | 3.06 |
| 328 | MIR23B     | MicroRNA 23b                                     | RNA Gene       | 18 | GC09P095085 | 3.06 |
| 329 | MIR127     | MicroRNA 127                                     | RNA Gene       | 18 | GC14P104252 | 3.06 |
| 330 | MIR483     | MicroRNA 483                                     | RNA Gene       | 17 | GC11M002178 | 3.06 |
| 331 | MIR181A1   | MicroRNA 181a-1                                  | RNA Gene       | 17 | GC01M198860 | 3.06 |
| 332 | MIR101-1   | MicroRNA 101-1                                   | RNA Gene       | 17 | GC01M065058 | 3.06 |
| 333 | MIR182     | MicroRNA 182                                     | RNA Gene       | 17 | GC07M129770 | 3.06 |
| 334 | MIR139     | MicroRNA 139                                     | RNA Gene       | 17 | GC11M072615 | 3.06 |
| 335 | MIR146B    | MicroRNA 146b                                    | RNA Gene       | 17 | GC10P102436 | 3.06 |
| 336 | MIR212     | MicroRNA 212                                     | RNA Gene       | 17 | GC17M002050 | 3.06 |
| 337 | MIR214     | MicroRNA 214                                     | RNA Gene       | 17 | GC01M172229 | 3.06 |
| 338 | MIR22      | MicroRNA 22                                      | RNA Gene       | 17 | GC17M001713 | 3.06 |
| 339 | MIR195     | MicroRNA 195                                     | RNA Gene       | 17 | GC17M007018 | 3.06 |
| 340 | MIR196A1   | MicroRNA 196a-1                                  | RNA Gene       | 17 | GC17M048632 | 3.06 |
| 341 | MIR196B    | MicroRNA 196b                                    | RNA Gene       | 17 | GC07M027224 | 3.06 |
| 342 | MIR199A1   | MicroRNA 199a-1                                  | RNA Gene       | 17 | GC19M010792 | 3.06 |
| 343 | MIR31      | MicroRNA 31                                      | RNA Gene       | 17 | GC09M021513 | 3.06 |
| 344 | MIR331     | MicroRNA 331                                     | RNA Gene       | 16 | GC12P095308 | 3.06 |
| 345 | MIR335     | MicroRNA 335                                     | RNA Gene       | 16 | GC07P130496 | 3.06 |
| 346 | MIR574     | MicroRNA 574                                     | RNA Gene       | 16 | GC04P038872 | 3.06 |
| 347 | MIR590     | MicroRNA 590                                     | RNA Gene       | 16 | GC07P074191 | 3.06 |
| 348 | MIR423     | MicroRNA 423                                     | RNA Gene       | 16 | GC17P030117 | 3.06 |
| 349 | MIR103A1   | MicroRNA 103a-1                                  | RNA Gene       | 16 | GC05M168560 | 3.06 |
| 350 | MIR130B    | MicroRNA 130b                                    | RNA Gene       | 16 | GC22P023989 | 3.06 |
| 351 | MIR15B     | MicroRNA 15b                                     | RNA Gene       | 16 | GC03P160404 | 3.06 |
| 352 | MIR455     | MicroRNA 455                                     | RNA Gene       | 16 | GC09P114209 | 3.06 |
| 353 | MIR186     | MicroRNA 186                                     | RNA Gene       | 16 | GC01M071067 | 3.06 |
| 354 | MIR18A     | MicroRNA 18a                                     | RNA Gene       | 16 | GC13P091422 | 3.06 |
| 355 | MIR20A     | MicroRNA 20a                                     | RNA Gene       | 16 | GC13P091427 | 3.06 |
| 356 | MIR151A    | MicroRNA 151a                                    | RNA Gene       | 16 | GC08M140733 | 3.06 |
| 357 | MIR193A    | MicroRNA 193a                                    | RNA Gene       | 16 | GC17P031559 | 3.06 |
| 358 | MIR675     | MicroRNA 675                                     | RNA Gene       | 15 | GC11M001997 | 3.06 |
| 359 | MIR338     | MicroRNA 338                                     | RNA Gene       | 15 | GC17M081126 | 3.06 |
| 360 | MIR486-1   | MicroRNA 486-1                                   | RNA Gene       | 15 | GC08M041660 | 3.06 |
| 361 | MIR371A    | MicroRNA 371a                                    | RNA Gene       | 15 | GC19P053787 | 3.06 |
| 362 | MIR361     | MicroRNA 361                                     | RNA Gene       | 15 | GC0XM085903 | 3.06 |
| 363 | MIR144     | MicroRNA 144                                     | RNA Gene       | 14 | GC17M029703 | 3.06 |
| 364 | MIR15A     | MicroRNA 15a                                     | RNA Gene       | 13 | GC13M050049 | 3.06 |
| 365 | MT-TF      | Mitochondrially Encoded tRNA-Phe (UUU/C)         | RNA Gene       | 13 | GCMTP000580 | 3.06 |
| 366 | MT-TH      | Mitochondrially Encoded tRNA-His (CAU/C)         | RNA Gene       | 12 | GCMTP012140 | 3.06 |
| 367 | LOC1019273 | Uncharacterized LOC101927322                     | RNA Gene       | 11 | GC18M058670 | 3.06 |
| 368 | CDR1-AS    | CDR1 Antisense RNA                               | RNA Gene       | 7  | GC0XU902169 | 3.06 |
| 369 | LEPQTL1    | Leptin, Serum Levels Of                          | Genetic Locus  | 4  | GC02U903086 | 3.06 |
| 370 | MBL2       | Mannose Binding Lectin 2                         | Protein Coding | 47 | GC10M052760 | 2.99 |
| 371 | ERBB2      | Erb-B2 Receptor Tyrosine Kinase 2                | Protein Coding | 54 | GC17P039687 | 2.97 |
| 372 | PPARG      | Peroxisome Proliferator Activated Receptor Gamma | Protein Coding | 53 | GC03P012287 | 2.97 |
| 373 | COL14A1    | Collagen Type XIV Alpha 1 Chain                  | Protein Coding | 42 | GC08P120060 | 2.94 |
| 374 | CA10       | Carbonic Anhydrase 10                            | Protein Coding | 39 | GC17M051630 | 2.94 |
| 375 | MRPL13     | Mitochondrial Ribosomal Protein L13              | Protein Coding | 38 | GC08M120377 | 2.94 |
| 376 | MTBP       | MDM2 Binding Protein                             | Protein Coding | 34 | GC08P120426 | 2.94 |
| 377 | LY86-AS1   | LY86 Antisense RNA 1                             | RNA Gene       | 16 | GC06M006349 | 2.94 |
| 378 | LTF        | Lactotransferrin                                 | Protein Coding | 43 | GC03M046435 | 2.92 |
| 379 | OGG1       | 8-Oxoguanine DNA Glycosylase                     | Protein Coding | 47 | GC03P009751 | 2.89 |
| 380 | MTHFR      | Methylenetetrahydrofolate Reductase              | Protein Coding | 47 | GC01M011785 | 2.84 |
| 381 | IL1A       | Interleukin 1 Alpha                              | Protein Coding | 44 | GC02M112773 | 2.81 |
| 382 | XRCC1      | X-Ray Repair Cross Complementing 1               | Protein Coding | 43 | GC19M043543 | 2.81 |

|     |          |                                                                  |                |    |             |      |
|-----|----------|------------------------------------------------------------------|----------------|----|-------------|------|
| 383 | CTNNB1   | Catenin Beta 1                                                   | Protein Coding | 53 | GC03P041236 | 2.77 |
| 384 | VEGFA    | Vascular Endothelial Growth Factor A                             | Protein Coding | 49 | GC06P043770 | 2.74 |
| 385 | LTA      | Lymphotoxin Alpha                                                | Protein Coding | 42 | GC06P033395 | 2.74 |
| 386 | ERCC8    | ERCC Excision Repair 8, CSA Ubiquitin Ligase Complex Subunit     | Protein Coding | 40 | GC05M060873 | 2.7  |
| 387 | CDKN1B   | Cyclin Dependent Kinase Inhibitor 1B                             | Protein Coding | 49 | GC12P012716 | 2.67 |
| 388 | GSTM1    | Glutathione S-Transferase Mu 1                                   | Protein Coding | 41 | GC01P109687 | 2.67 |
| 389 | GSTT1    | Glutathione S-Transferase Theta 1                                | Protein Coding | 33 | GC22M100270 | 2.67 |
| 390 | CCL2     | C-C Motif Chemokine Ligand 2                                     | Protein Coding | 49 | GC17P034255 | 2.62 |
| 391 | PSCA     | Prostate Stem Cell Antigen                                       | Protein Coding | 39 | GC08P142670 | 2.6  |
| 392 | TXN      | Thioredoxin                                                      | Protein Coding | 46 | GC09M110243 | 2.59 |
| 393 | ABCB1    | ATP Binding Cassette Subfamily B Member 1                        | Protein Coding | 51 | GC07M087504 | 2.58 |
| 394 | ICAM1    | Intercellular Adhesion Molecule 1                                | Protein Coding | 50 | GC19P010270 | 2.58 |
| 395 | TLR1     | Toll Like Receptor 1                                             | Protein Coding | 47 | GC04M038797 | 2.55 |
| 396 | TLR10    | Toll Like Receptor 10                                            | Protein Coding | 41 | GC04M038773 | 2.55 |
| 397 | CYP2E1   | Cytochrome P450 Family 2 Subfamily E Member 1                    | Protein Coding | 45 | GC10P133520 | 2.52 |
| 398 | CD44     | CD44 Molecule (Indian Blood Group)                               | Protein Coding | 47 | GC11P035139 | 2.51 |
| 399 | IL23A    | Interleukin 23 Subunit Alpha                                     | Protein Coding | 39 | GC12P056335 | 2.49 |
| 400 | CCL20    | C-C Motif Chemokine Ligand 20                                    | Protein Coding | 44 | GC02P227813 | 2.46 |
| 401 | NOD2     | Nucleotide Binding Oligomerization Domain Containing 2           | Protein Coding | 48 | GC16P050693 | 2.46 |
| 402 | AQP3     | Aquaporin 3 (Gill Blood Group)                                   | Protein Coding | 47 | GC09M033431 | 2.41 |
| 403 | AQP4     | Aquaporin 4                                                      | Protein Coding | 44 | GC18M026852 | 2.41 |
| 404 | MIP      | Major Intrinsic Protein Of Lens Fiber                            | Protein Coding | 41 | GC12M056449 | 2.41 |
| 405 | TP73     | Tumor Protein P73                                                | Protein Coding | 46 | GC01P003652 | 2.39 |
| 406 | KRT18    | Keratin 18                                                       | Protein Coding | 49 | GC12P052948 | 2.38 |
| 407 | TFF1     | Trefoil Factor 1                                                 | Protein Coding | 45 | GC21M042362 | 2.37 |
| 408 | KCNE2    | Potassium Voltage-Gated Channel Subfamily E Regulatory Subunit 2 | Protein Coding | 41 | GC21P034364 | 2.34 |
| 409 | BIRC5    | Baculoviral IAP Repeat Containing 5                              | Protein Coding | 46 | GC17P078214 | 2.32 |
| 410 | THBS1    | Thrombospondin 1                                                 | Protein Coding | 45 | GC15P039581 | 2.32 |
| 411 | TIMP3    | TIMP Metalloproteinase Inhibitor 3                               | Protein Coding | 45 | GC22P032800 | 2.32 |
| 412 | CMA1     | Chymase 1                                                        | Protein Coding | 43 | GC14M024506 | 2.32 |
| 413 | MIR155   | MicroRNA 155                                                     | RNA Gene       | 16 | GC21P025573 | 2.28 |
| 414 | KRT20    | Keratin 20                                                       | Protein Coding | 41 | GC17M040875 | 2.28 |
| 415 | PARP1    | Poly(ADP-Ribose) Polymerase 1                                    | Protein Coding | 49 | GC01M226360 | 2.23 |
| 416 | MSH2     | MutS Homolog 2                                                   | Protein Coding | 48 | GC02P047402 | 2.23 |
| 417 | CD59     | CD59 Molecule (CD59 Blood Group)                                 | Protein Coding | 46 | GC11M033704 | 2.23 |
| 418 | ALDH2    | Aldehyde Dehydrogenase 2 Family Member                           | Protein Coding | 50 | GC12P111766 | 2.22 |
| 419 | CD55     | CD55 Molecule (Cromer Blood Group)                               | Protein Coding | 47 | GC01P207321 | 2.22 |
| 420 | ACE      | Angiotensin I Converting Enzyme                                  | Protein Coding | 49 | GC17P063477 | 2.19 |
| 421 | XDH      | Xanthine Dehydrogenase                                           | Protein Coding | 47 | GC02M031294 | 2.19 |
| 422 | RASSF1   | Ras Association Domain Family Member 1                           | Protein Coding | 43 | GC03M050329 | 2.19 |
| 423 | TRPV1    | Transient Receptor Potential Cation Channel Subfamily V Member 1 | Protein Coding | 46 | GC17M003565 | 2.18 |
| 424 | PDX1     | Pancreatic And Duodenal Homeobox 1                               | Protein Coding | 46 | GC13P027921 | 2.18 |
| 425 | KRT8     | Keratin 8                                                        | Protein Coding | 47 | GC12M052897 | 2.16 |
| 426 | CCR5     | C-C Motif Chemokine Receptor 5 (Gene/Pseudogene)                 | Protein Coding | 47 | GC03P046384 | 2.14 |
| 427 | CXCR3    | C-X-C Motif Chemokine Receptor 3                                 | Protein Coding | 44 | GC0XM071615 | 2.14 |
| 428 | SKP2     | S-Phase Kinase Associated Protein 2                              | Protein Coding | 44 | GC05P036103 | 2.14 |
| 429 | KRT19    | Keratin 19                                                       | Protein Coding | 45 | GC17M041523 | 2.13 |
| 430 | ADIPOQ   | Adiponectin, C1Q And Collagen Domain Containing                  | Protein Coding | 45 | GC03P186842 | 2.13 |
| 431 | ADA      | Adenosine Deaminase                                              | Protein Coding | 50 | GC20M044620 | 2.13 |
| 432 | CD46     | CD46 Molecule                                                    | Protein Coding | 46 | GC01P207752 | 2.09 |
| 433 | SELE     | Selectin E                                                       | Protein Coding | 44 | GC01M169722 | 2.09 |
| 434 | HSPA4    | Heat Shock Protein Family A (Hsp70) Member 4                     | Protein Coding | 42 | GC05P133051 | 2.09 |
| 435 | IL33     | Interleukin 33                                                   | Protein Coding | 39 | GC09P006206 | 2.09 |
| 436 | IL2RB    | Interleukin 2 Receptor Subunit Beta                              | Protein Coding | 48 | GC22M037125 | 2.07 |
| 437 | HBEGF    | Heparin Binding EGF Like Growth Factor                           | Protein Coding | 43 | GC05M140332 | 2.07 |
| 438 | VIP      | Vasoactive Intestinal Peptide                                    | Protein Coding | 45 | GC06P152750 | 2.05 |
| 439 | THBD     | Thrombomodulin                                                   | Protein Coding | 44 | GC20M023026 | 2.05 |
| 440 | IL21     | Interleukin 21                                                   | Protein Coding | 43 | GC04M122612 | 2.05 |
| 441 | CCL21    | C-C Motif Chemokine Ligand 21                                    | Protein Coding | 43 | GC09M034709 | 2.05 |
| 442 | CALCA    | Calcitonin Related Polypeptide Alpha                             | Protein Coding | 43 | GC11M014945 | 2.03 |
| 443 | XRCC3    | X-Ray Repair Cross Complementing 3                               | Protein Coding | 41 | GC14M103697 | 2.03 |
| 444 | SLC39A11 | Solute Carrier Family 39 Member 11                               | Protein Coding | 37 | GC17M072645 | 2.03 |
| 445 | KRT1     | Keratin 1                                                        | Protein Coding | 45 | GC12M052674 | 1.99 |
| 446 | ANXA1    | Annexin A1                                                       | Protein Coding | 49 | GC09P073151 | 1.99 |
| 447 | ITGB7    | Integrin Subunit Beta 7                                          | Protein Coding | 44 | GC12M053191 | 1.99 |
| 448 | FUT3     | Fucosyltransferase 3 (Lewis Blood Group)                         | Protein Coding | 42 | GC19M005843 | 1.99 |
| 449 | SLPI     | Secretory Leukocyte Peptidase Inhibitor                          | Protein Coding | 39 | GC20M045252 | 1.99 |
| 450 | KIT      | KIT Proto-Oncogene, Receptor Tyrosine Kinase                     | Protein Coding | 53 | GC04P054657 | 1.95 |
| 451 | ERBB3    | Erb-B2 Receptor Tyrosine Kinase 3                                | Protein Coding | 53 | GC12P056086 | 1.95 |
| 452 | TP53INP1 | Tumor Protein P53 Inducible Nuclear Protein 1                    | Protein Coding | 38 | GC08M094925 | 1.95 |
| 453 | TP53AIP1 | Tumor Protein P53 Regulated Apoptosis Inducing Protein 1         | Protein Coding | 36 | GC11M128934 | 1.95 |
| 454 | MIR203A  | MicroRNA 203a                                                    | RNA Gene       | 17 | GC14P104331 | 1.95 |
| 455 | NFE2L2   | Nuclear Factor, Erythroid 2 Like 2                               | Protein Coding | 47 | GC02M177227 | 1.92 |
| 456 | NTSE     | 5'-Nucleotidase Ecto                                             | Protein Coding | 50 | GC06P085449 | 1.91 |
| 457 | MMP8     | Matrix Metalloproteinase 8                                       | Protein Coding | 47 | GC11M102617 | 1.91 |
| 458 | PDHX     | Pyruvate Dehydrogenase Complex Component X                       | Protein Coding | 47 | GC11P034894 | 1.91 |
| 459 | ITGAL    | Integrin Subunit Alpha L                                         | Protein Coding | 46 | GC16P030472 | 1.91 |

|     |           |                                                                                       |                |    |             |      |
|-----|-----------|---------------------------------------------------------------------------------------|----------------|----|-------------|------|
| 460 | ITGAM     | Integrin Subunit Alpha M                                                              | Protein Coding | 46 | GC16P031420 | 1.91 |
| 461 | CCR4      | C-C Motif Chemokine Receptor 4                                                        | Protein Coding | 45 | GC03P032951 | 1.91 |
| 462 | CANT1     | Calcium Activated Nucleotidase 1                                                      | Protein Coding | 43 | GC17M078992 | 1.91 |
| 463 | CDH13     | Cadherin 13                                                                           | Protein Coding | 42 | GC16P082626 | 1.91 |
| 464 | L1TD1     | LINE1 Type Transposase Domain Containing 1                                            | Protein Coding | 34 | GC01P062194 | 1.91 |
| 465 | MIR429    | MicroRNA 429                                                                          | RNA Gene       | 18 | GC01P001297 | 1.91 |
| 466 | BRAF      | B-Raf Proto-Oncogene, Serine/Threonine Kinase                                         | Protein Coding | 54 | GC07M140719 | 1.86 |
| 467 | INS       | Insulin                                                                               | Protein Coding | 48 | GC11M002159 | 1.86 |
| 468 | ELANE     | Elastase, Neutrophil Expressed                                                        | Protein Coding | 47 | GC19P000854 | 1.86 |
| 469 | GH1       | Growth Hormone 1                                                                      | Protein Coding | 45 | GC17M063917 | 1.86 |
| 470 | APEX1     | Apurinic/Apyrimidinic Endodeoxyribonuclease 1                                         | Protein Coding | 45 | GC14P020455 | 1.86 |
| 471 | CCR7      | C-C Motif Chemokine Receptor 7                                                        | Protein Coding | 45 | GC17M040556 | 1.86 |
| 472 | IL12A     | Interleukin 12A                                                                       | Protein Coding | 44 | GC03P159988 | 1.86 |
| 473 | FLNC      | Filamin C                                                                             | Protein Coding | 44 | GC07P128830 | 1.86 |
| 474 | HAND1     | Heart And Neural Crest Derivatives Expressed 1                                        | Protein Coding | 41 | GC05M154450 | 1.86 |
| 475 | CXCL2     | C-X-C Motif Chemokine Ligand 2                                                        | Protein Coding | 41 | GC04M074097 | 1.86 |
| 476 | BGLAP     | Bone Gamma-Carboxyglutamate Protein                                                   | Protein Coding | 40 | GC01P156242 | 1.86 |
| 477 | CCN2      | Cellular Communication Network Factor 2                                               | Protein Coding | 39 | GC06M131948 | 1.86 |
| 478 | RNASE7    | Ribonuclease A Family Member 7                                                        | Protein Coding | 35 | GC14P021042 | 1.86 |
| 479 | TLR2      | Toll Like Receptor 2                                                                  | Protein Coding | 51 | GC04P153684 | 1.81 |
| 480 | BCL2L1    | BCL2 Like 1                                                                           | Protein Coding | 47 | GC20M031664 | 1.81 |
| 481 | ARSA      | Arylsulfatase A                                                                       | Protein Coding | 47 | GC22M050622 | 1.81 |
| 482 | F13A1     | Coagulation Factor XIII A Chain                                                       | Protein Coding | 45 | GC06M006144 | 1.81 |
| 483 | NKX2-1    | NK2 Homeobox 1                                                                        | Protein Coding | 45 | GC14M036516 | 1.81 |
| 484 | ADORA2A   | Adenosine A2a Receptor                                                                | Protein Coding | 45 | GC22P024417 | 1.81 |
| 485 | S100A1    | S100 Calcium Binding Protein A1                                                       | Protein Coding | 42 | GC01P153627 | 1.81 |
| 486 | CCL19     | C-C Motif Chemokine Ligand 19                                                         | Protein Coding | 42 | GC09M034692 | 1.81 |
| 487 | RNASE3    | Ribonuclease A Family Member 3                                                        | Protein Coding | 40 | GC14P020891 | 1.81 |
| 488 | ABO       | ABO, Alpha 1-3-N-Acetylgalactosaminyltransferase And Alpha 1-3-Galactosyltransferase  | Protein Coding | 38 | GC09M133250 | 1.81 |
| 489 | GAL3ST1   | Galactose-3-O-Sulfotransferase 1                                                      | Protein Coding | 36 | GC22M030554 | 1.81 |
| 490 | FOXJ1     | Forkhead Box J1                                                                       | Protein Coding | 35 | GC17M076136 | 1.81 |
| 491 | RNF180    | Ring Finger Protein 180                                                               | Protein Coding | 32 | GC05P064165 | 1.81 |
| 492 | HSPB1     | Heat Shock Protein Family B (Small) Member 1                                          | Protein Coding | 51 | GC07P076302 | 1.74 |
| 493 | TNFSF10   | TNF Superfamily Member 10                                                             | Protein Coding | 46 | GC03M172505 | 1.74 |
| 494 | LGALS3    | Galectin 3                                                                            | Protein Coding | 45 | GC14P055124 | 1.74 |
| 495 | BAK1      | BCL2 Antagonist/Killer 1                                                              | Protein Coding | 45 | GC06M033572 | 1.74 |
| 496 | LGALS1    | Galectin 1                                                                            | Protein Coding | 43 | GC22P037675 | 1.74 |
| 497 | NEU1      | Neuraminidase 1                                                                       | Protein Coding | 43 | GC06M031857 | 1.74 |
| 498 | AMH       | Anti-Mullerian Hormone                                                                | Protein Coding | 43 | GC19P002251 | 1.74 |
| 499 | CTTN      | Cortactin                                                                             | Protein Coding | 42 | GC11P070398 | 1.74 |
| 500 | LY96      | Lymphocyte Antigen 96                                                                 | Protein Coding | 42 | GC08P073991 | 1.74 |
| 501 | CCL28     | C-C Motif Chemokine Ligand 28                                                         | Protein Coding | 40 | GC05M043356 | 1.74 |
| 502 | LGALS9    | Galectin 9                                                                            | Protein Coding | 39 | GC17P027629 | 1.74 |
| 503 | SAPCD2    | Suppressor APC Domain Containing 2                                                    | Protein Coding | 31 | GC09M137062 | 1.74 |
| 504 | IGHE      | Immunoglobulin Heavy Constant Epsilon                                                 | Protein Coding | 28 | GC14M105826 | 1.74 |
| 505 | TERT      | Telomerase Reverse Transcriptase                                                      | Protein Coding | 52 | GC05M001253 | 1.66 |
| 506 | APOA1     | Apolipoprotein A1                                                                     | Protein Coding | 49 | GC11M116835 | 1.66 |
| 507 | ALOX5     | Arachidonate 5-Lipoxygenase                                                           | Protein Coding | 48 | GC10P045374 | 1.66 |
| 508 | PRKAA1    | Protein Kinase AMP-Activated Catalytic Subunit Alpha 1                                | Protein Coding | 47 | GC05M040759 | 1.66 |
| 509 | GHR       | Growth Hormone Receptor                                                               | Protein Coding | 47 | GC05P042429 | 1.66 |
| 510 | ERCC2     | ERCC Excision Repair 2, TFIIH Core Complex Helicase Subunit                           | Protein Coding | 46 | GC19M045349 | 1.66 |
| 511 | PTGES3    | Prostaglandin E Synthase 3                                                            | Protein Coding | 45 | GC12M056667 | 1.66 |
| 512 | XPC       | XPC Complex Subunit, DNA Damage Recognition And Repair Factor                         | Protein Coding | 45 | GC03M015413 | 1.66 |
| 513 | ERCC4     | ERCC Excision Repair 4, Endonuclease Catalytic Subunit                                | Protein Coding | 45 | GC16P013920 | 1.66 |
| 514 | ERCC5     | ERCC Excision Repair 5, Endonuclease                                                  | Protein Coding | 45 | GC13P102808 | 1.66 |
| 515 | DDB2      | Damage Specific DNA Binding Protein 2                                                 | Protein Coding | 45 | GC11P047237 | 1.66 |
| 516 | LTB4R     | Leukotriene B4 Receptor                                                               | Protein Coding | 44 | GC14P024311 | 1.66 |
| 517 | GAB1      | GRB2 Associated Receptor Protein 1                                                    | Protein Coding | 44 | GC04P143336 | 1.66 |
| 518 | TNFRSF10D | TNF Receptor Superfamily Member 10d                                                   | Protein Coding | 43 | GC08M023135 | 1.66 |
| 519 | MUC5B     | Mucin 5B, Oligomeric Mucus/Gel-Forming                                                | Protein Coding | 42 | GC11P001244 | 1.66 |
| 520 | CYSLTR1   | Cysteinyl Leukotriene Receptor 1                                                      | Protein Coding | 42 | GC0XM078271 | 1.66 |
| 521 | NDUFS5    | NADH:Ubiquinone Oxidoreductase Subunit S5                                             | Protein Coding | 41 | GC01P039026 | 1.66 |
| 522 | BLVRB     | Biliverdin Reductase B                                                                | Protein Coding | 40 | GC19M040447 | 1.66 |
| 523 | KIR3DL1   | Killer Cell Immunoglobulin Like Receptor, Three Ig Domains And Long Cytoplasmic Tail  | Protein Coding | 39 | GC19P055293 | 1.66 |
| 524 | CCL25     | C-C Motif Chemokine Ligand 25                                                         | Protein Coding | 39 | GC19P008117 | 1.66 |
| 525 | KIR2DL4   | Killer Cell Immunoglobulin Like Receptor, Two Ig Domains And Long Cytoplasmic Tail 4  | Protein Coding | 38 | GC19P055292 | 1.66 |
| 526 | KIR3DL2   | Killer Cell Immunoglobulin Like Receptor, Three Ig Domains And Long Cytoplasmic Tail  | Protein Coding | 38 | GC19P055295 | 1.66 |
| 527 | MADCAM1   | Mucosal Vascular Addressin Cell Adhesion Molecule 1                                   | Protein Coding | 38 | GC19P000499 | 1.66 |
| 528 | SSPN      | Sarcospan                                                                             | Protein Coding | 36 | GC12P026118 | 1.66 |
| 529 | KIR2DL3   | Killer Cell Immunoglobulin Like Receptor, Two Ig Domains And Long Cytoplasmic Tail 3  | Protein Coding | 36 | GC19P055318 | 1.66 |
| 530 | KIR2DL1   | Killer Cell Immunoglobulin Like Receptor, Two Ig Domains And Long Cytoplasmic Tail 1  | Protein Coding | 35 | GC19P055289 | 1.66 |
| 531 | KIR3DL3   | Killer Cell Immunoglobulin Like Receptor, Three Ig Domains And Long Cytoplasmic Tail  | Protein Coding | 35 | GC19P055319 | 1.66 |
| 532 | KIR2DS4   | Killer Cell Immunoglobulin Like Receptor, Two Ig Domains And Short Cytoplasmic Tail 4 | Protein Coding | 32 | GC19P055294 | 1.66 |
| 533 | KIR2DL2   | Killer Cell Immunoglobulin Like Receptor, Two Ig Domains And Long Cytoplasmic Tail 2  | Protein Coding | 24 | GC19MP00144 | 1.66 |
| 534 | KIR2DS2   | Killer Cell Immunoglobulin Like Receptor, Two Ig Domains And Short Cytoplasmic Tail 2 | Protein Coding | 24 | GC19MR00122 | 1.66 |
| 535 | KIR2DS3   | Killer Cell Immunoglobulin Like Receptor, Two Ig Domains And Short Cytoplasmic Tail 3 | Protein Coding | 24 | GC19ME00037 | 1.66 |
| 536 | KIR2DS5   | Killer Cell Immunoglobulin Like Receptor, Two Ig Domains And Short Cytoplasmic Tail 5 | Protein Coding | 24 | GC19MR00030 | 1.66 |

|     |                 |                                                                                       |                |    |              |      |
|-----|-----------------|---------------------------------------------------------------------------------------|----------------|----|--------------|------|
| 537 | KIR2DL5A        | Killer Cell Immunoglobulin Like Receptor, Two Ig Domains And Long Cytoplasmic Tail 5  | Protein Coding | 23 | GC19MR000046 | 1.66 |
| 538 | KIR2DS1         | Killer Cell Immunoglobulin Like Receptor, Two Ig Domains And Short Cytoplasmic Tail 1 | Protein Coding | 23 | GC19MR000013 | 1.66 |
| 539 | KIR3DS1         | Killer Cell Immunoglobulin Like Receptor, Three Ig Domains And Short Cytoplasmic Tail | Protein Coding | 21 | GC19MR000058 | 1.66 |
| 540 | KIR3DP1         | Killer Cell Immunoglobulin Like Receptor, Three Ig Domains Pseudogene 1               | Pseudogene     | 15 | GC19P055291  | 1.66 |
| 541 | KIR2DP1         | Killer Cell Immunoglobulin Like Receptor, Two Ig Domains Pseudogene 1                 | Pseudogene     | 10 | GC19P055258  | 1.66 |
| 542 | IGES            | Immunoglobulin E Concentration, Serum                                                 | Genetic Locus  | 5  | GC05U990033  | 1.66 |
| 543 | APC             | APC Regulator Of WNT Signaling Pathway                                                | Protein Coding | 48 | GC05P112707  | 1.64 |
| 544 | TYK2            | Tyrosine Kinase 2                                                                     | Protein Coding | 53 | GC19M010350  | 1.64 |
| 545 | SHH             | Sonic Hedgehog Signaling Molecule                                                     | Protein Coding | 49 | GC07M155799  | 1.63 |
| 546 | CD14            | CD14 Molecule                                                                         | Protein Coding | 45 | GC05M140631  | 1.6  |
| 547 | MYC             | MYC Proto-Oncogene, BHLH Transcription Factor                                         | Protein Coding | 52 | GC08P127735  | 1.57 |
| 548 | TLR5            | Toll Like Receptor 5                                                                  | Protein Coding | 47 | GC01M223109  | 1.54 |
| 549 | TLR9            | Toll Like Receptor 9                                                                  | Protein Coding | 46 | GC03M052222  | 1.54 |
| 550 | LYZ             | Lysozyme                                                                              | Protein Coding | 47 | GC12P069348  | 1.45 |
| 551 | NUCB2           | Nucleobindin 2                                                                        | Protein Coding | 39 | GC11P017218  | 1.45 |
| 552 | GABPA           | GA Binding Protein Transcription Factor Subunit Alpha                                 | Protein Coding | 39 | GC21P025734  | 1.45 |
| 553 | IL17C           | Interleukin 17C                                                                       | Protein Coding | 38 | GC16P088638  | 1.45 |
| 554 | GRP             | Gastrin Releasing Peptide                                                             | Protein Coding | 41 | GC18P059220  | 1.43 |
| 555 | S1PR5           | Sphingosine-1-Phosphate Receptor 5                                                    | Protein Coding | 45 | GC19M010512  | 1.43 |
| 556 | PDE4A           | Phosphodiesterase 4A                                                                  | Protein Coding | 45 | GC19P010416  | 1.43 |
| 557 | P2RY11          | Purinergic Receptor P2Y11                                                             | Protein Coding | 43 | GC19P010146  | 1.43 |
| 558 | CDC37           | Cell Division Cycle 37                                                                | Protein Coding | 41 | GC19M010391  | 1.43 |
| 559 | SLURP1          | Secreted LY6/PLAUR Domain Containing 1                                                | Protein Coding | 41 | GC08M142740  | 1.43 |
| 560 | ICAM3           | Intercellular Adhesion Molecule 3                                                     | Protein Coding | 41 | GC19M010335  | 1.43 |
| 561 | ERC2            | ELKS/RAB6-Interacting/CAST Family Member 2                                            | Protein Coding | 38 | GC03M055509  | 1.43 |
| 562 | JRK             | Jrk Helix-Turn-Helix Protein                                                          | Protein Coding | 36 | GC08M142657  | 1.43 |
| 563 | ATG4D           | Autophagy Related 4D Cysteine Peptidase                                               | Protein Coding | 36 | GC19P010543  | 1.43 |
| 564 | LY6K            | Lymphocyte Antigen 6 Family Member K                                                  | Protein Coding | 34 | GC08P142700  | 1.43 |
| 565 | CCDC66          | Coiled-Coil Domain Containing 66                                                      | Protein Coding | 32 | GC03P056567  | 1.43 |
| 566 | THEM6           | Thioesterase Superfamily Member 6                                                     | Protein Coding | 31 | GC08P142727  | 1.43 |
| 567 | C19orf38        | Chromosome 19 Open Reading Frame 38                                                   | Protein Coding | 28 | GC19P010837  | 1.43 |
| 568 | FDX2            | Ferredoxin 2                                                                          | Protein Coding | 28 | GC19M010311  | 1.43 |
| 569 | ENSG00000252045 |                                                                                       | RNA Gene       | 6  | GC21P032538  | 1.43 |
| 570 | RNA5SP490       | RNA, 5S Ribosomal Pseudogene 490                                                      | Pseudogene     | 6  | GC21P032563  | 1.43 |
| 571 | Inc-JRK-1       |                                                                                       | RNA Gene       | 4  | GC08M142685  | 1.43 |
| 572 | Inc-TIMM29-1    |                                                                                       | RNA Gene       | 4  | GC19P010385  | 1.43 |
| 573 | ENSG00000285717 |                                                                                       | RNA Gene       | 4  | GC06P006450  | 1.43 |
| 574 | Inc-PDE4A-1     |                                                                                       | RNA Gene       | 3  | GC19P010412  | 1.43 |
| 575 | piR-52079-093   |                                                                                       | RNA Gene       | 3  | GC19P010407  | 1.43 |
| 576 | PLAU            | Plasminogen Activator, Urokinase                                                      | Protein Coding | 52 | GC10P073909  | 1.42 |
| 577 | NOX1            | NADPH Oxidase 1                                                                       | Protein Coding | 42 | GC0XM100843  | 1.39 |
| 578 | MMP3            | Matrix Metallopeptidase 3                                                             | Protein Coding | 51 | GC11M102835  | 1.31 |
| 579 | MIR135B         | MicroRNA 135b                                                                         | RNA Gene       | 17 | GC01M205448  | 1.31 |
| 580 | S100A9          | S100 Calcium Binding Protein A9                                                       | Protein Coding | 43 | GC01P153357  | 1.28 |
| 581 | CLDN2           | Claudin 2                                                                             | Protein Coding | 41 | GC0XP106900  | 1.28 |
| 582 | GKN1            | Gastrokine 1                                                                          | Protein Coding | 38 | GC02P068974  | 1.28 |
| 583 | GJB1            | Gap Junction Protein Beta 1                                                           | Protein Coding | 47 | GC0XP071215  | 1.27 |
| 584 | IL18            | Interleukin 18                                                                        | Protein Coding | 44 | GC11M112143  | 1.27 |
| 585 | IL22            | Interleukin 22                                                                        | Protein Coding | 41 | GC12M068248  | 1.27 |
| 586 | CASP1           | Caspase 1                                                                             | Protein Coding | 50 | GC11M105025  | 1.21 |
| 587 | BAX             | BCL2 Associated X, Apoptosis Regulator                                                | Protein Coding | 48 | GC19P048954  | 1.21 |
| 588 | TREM1           | Triggering Receptor Expressed On Myeloid Cells 1                                      | Protein Coding | 42 | GC06M041267  | 1.17 |
| 589 | GJA1            | Gap Junction Protein Alpha 1                                                          | Protein Coding | 50 | GC06P121436  | 1.13 |
| 590 | SERPINE1        | Serpin Family E Member 1                                                              | Protein Coding | 50 | GC07P101127  | 1.13 |
| 591 | PLAT            | Plasminogen Activator, Tissue Type                                                    | Protein Coding | 49 | GC08M042174  | 1.13 |
| 592 | IL12B           | Interleukin 12B                                                                       | Protein Coding | 44 | GC05M159314  | 1.13 |
| 593 | CDX1            | Caudal Type Homeobox 1                                                                | Protein Coding | 36 | GC05P150133  | 1.13 |
| 594 | CCND1           | Cyclin D1                                                                             | Protein Coding | 52 | GC11P069641  | 1.13 |
| 595 | HSPA2           | Heat Shock Protein Family A (Hsp70) Member 2                                          | Protein Coding | 44 | GC14P064535  | 1.09 |
| 596 | CRH             | Corticotropin Releasing Hormone                                                       | Protein Coding | 43 | GC08M066176  | 1.09 |
| 597 | CLDN4           | Claudin 4                                                                             | Protein Coding | 41 | GC07P073799  | 1.09 |
| 598 | CLDN11          | Claudin 11                                                                            | Protein Coding | 40 | GC03P170418  | 1.09 |
| 599 | CLDN23          | Claudin 23                                                                            | Protein Coding | 36 | GC08P008701  | 1.09 |
| 600 | CCL3            | C-C Motif Chemokine Ligand 3                                                          | Protein Coding | 39 | GC17M036088  | 1.06 |
| 601 | B2M             | Beta-2-Microglobulin                                                                  | Protein Coding | 49 | GC15P044711  | 1.04 |
| 602 | POU5F1          | POU Class 5 Homeobox 1                                                                | Protein Coding | 47 | GC06M031177  | 1.04 |
| 603 | SELL            | Selectin L                                                                            | Protein Coding | 42 | GC01M169690  | 1.04 |
| 604 | PTEN            | Phosphatase And Tensin Homolog                                                        | Protein Coding | 53 | GC10P087863  | 1.03 |
| 605 | CDKN1A          | Cyclin Dependent Kinase Inhibitor 1A                                                  | Protein Coding | 50 | GC06P046057  | 1.03 |
| 606 | CD209           | CD209 Molecule                                                                        | Protein Coding | 42 | GC19M007739  | 1.01 |
| 607 | CD83            | CD83 Molecule                                                                         | Protein Coding | 38 | GC06P014117  | 1.01 |
| 608 | TSLP            | Thymic Stromal Lymphopoietin                                                          | Protein Coding | 38 | GC05P111070  | 0.99 |
| 609 | TERC            | Telomerase RNA Component                                                              | RNA Gene       | 27 | GC03M169765  | 0.99 |
| 610 | TFRC            | Transferrin Receptor                                                                  | Protein Coding | 49 | GC03M196027  | 0.98 |
| 611 | FTL             | Ferritin Light Chain                                                                  | Protein Coding | 47 | GC19P048965  | 0.98 |
| 612 | FPR2            | Formyl Peptide Receptor 2                                                             | Protein Coding | 46 | GC19P051752  | 0.98 |
| 613 | IL7             | Interleukin 7                                                                         | Protein Coding | 42 | GC08M078689  | 0.98 |

|     |           |                                                                      |                |    |             |      |
|-----|-----------|----------------------------------------------------------------------|----------------|----|-------------|------|
| 614 | CHIA      | Chitinase Acidic                                                     | Protein Coding | 40 | GC01P111291 | 0.98 |
| 615 | FPR3      | Formyl Peptide Receptor 3                                            | Protein Coding | 39 | GC19P051795 | 0.98 |
| 616 | MAPK1     | Mitogen-Activated Protein Kinase 1                                   | Protein Coding | 51 | GC22M021754 | 0.95 |
| 617 | SLC5A5    | Solute Carrier Family 5 Member 5                                     | Protein Coding | 45 | GC19P022240 | 0.95 |
| 618 | MKI67     | Marker Of Proliferation Ki-67                                        | Protein Coding | 42 | GC10M128096 | 0.95 |
| 619 | TDGF1     | Teratocarcinoma-Derived Growth Factor 1                              | Protein Coding | 42 | GC03P046576 | 0.95 |
| 620 | MMP1      | Matrix Metallopeptidase 1                                            | Protein Coding | 52 | GC11M102810 | 0.92 |
| 621 | SMAD4     | SMAD Family Member 4                                                 | Protein Coding | 50 | GC18P051028 | 0.92 |
| 622 | CYP3A4    | Cytochrome P450 Family 3 Subfamily A Member 4                        | Protein Coding | 49 | GC07M099759 | 0.92 |
| 623 | CD74      | CD74 Molecule                                                        | Protein Coding | 43 | GC05M150378 | 0.92 |
| 624 | AKT1      | AKT Serine/Threonine Kinase 1                                        | Protein Coding | 54 | GC14M104769 | 0.9  |
| 625 | F2RL1     | F2R Like Trypsin Receptor 1                                          | Protein Coding | 46 | GC05P076818 | 0.9  |
| 626 | CDC73     | Cell Division Cycle 73                                               | Protein Coding | 45 | GC01P193090 | 0.9  |
| 627 | HSPA1B    | Heat Shock Protein Family A (Hsp70) Member 1B                        | Protein Coding | 41 | GC06P033427 | 0.9  |
| 628 | SMOX      | Spermine Oxidase                                                     | Protein Coding | 39 | GC20P004120 | 0.9  |
| 629 | HSP90AA2P | Heat Shock Protein 90 Alpha Family Class A Member 2, Pseudogene      | Pseudogene     | 21 | GC11M027888 | 0.9  |
| 630 | EZH2      | Enhancer Of Zeste 2 Polycomb Repressive Complex 2 Subunit            | Protein Coding | 53 | GC07M148807 | 0.86 |
| 631 | CTSB      | Cathepsin B                                                          | Protein Coding | 51 | GC08M011842 | 0.86 |
| 632 | CCNB1     | Cyclin B1                                                            | Protein Coding | 47 | GC05P069167 | 0.86 |
| 633 | CDK1      | Cyclin Dependent Kinase 1                                            | Protein Coding | 46 | GC10P060772 | 0.86 |
| 634 | VCAM1     | Vascular Cell Adhesion Molecule 1                                    | Protein Coding | 46 | GC01P100719 | 0.86 |
| 635 | SELP      | Selectin P                                                           | Protein Coding | 46 | GC01M169558 | 0.86 |
| 636 | CTSL      | Cathepsin L                                                          | Protein Coding | 46 | GC09P087725 | 0.86 |
| 637 | LIF       | LIF Interleukin 6 Family Cytokine                                    | Protein Coding | 43 | GC22M030240 | 0.86 |
| 638 | S100A12   | S100 Calcium Binding Protein A12                                     | Protein Coding | 39 | GC01M153346 | 0.86 |
| 639 | IRX1      | Iroquois Homeobox 1                                                  | Protein Coding | 36 | GC05P003596 | 0.86 |
| 640 | GATA4     | GATA Binding Protein 4                                               | Protein Coding | 48 | GC08P011676 | 0.83 |
| 641 | GATA6     | GATA Binding Protein 6                                               | Protein Coding | 47 | GC18P022169 | 0.83 |
| 642 | GCG       | Glucagon                                                             | Protein Coding | 41 | GC02M162142 | 0.83 |
| 643 | CXCR4     | C-X-C Motif Chemokine Receptor 4                                     | Protein Coding | 52 | GC02M136114 | 0.8  |
| 644 | MAPK14    | Mitogen-Activated Protein Kinase 14                                  | Protein Coding | 52 | GC06P046047 | 0.8  |
| 645 | COMT      | Catechol-O-Methyltransferase                                         | Protein Coding | 50 | GC22P019941 | 0.8  |
| 646 | NOS3      | Nitric Oxide Synthase 3                                              | Protein Coding | 50 | GC07P150990 | 0.8  |
| 647 | FOS       | Fos Proto-Oncogene, AP-1 Transcription Factor Subunit                | Protein Coding | 50 | GC14P075278 | 0.8  |
| 648 | PBX1      | PBX Homeobox 1                                                       | Protein Coding | 49 | GC01P164524 | 0.8  |
| 649 | GLI2      | GLI Family Zinc Finger 2                                             | Protein Coding | 48 | GC02P120735 | 0.8  |
| 650 | SMO       | Smoothened, Frizzled Class Receptor                                  | Protein Coding | 48 | GC07P129303 | 0.8  |
| 651 | HPGD      | 15-Hydroxyprostaglandin Dehydrogenase                                | Protein Coding | 48 | GC04M174490 | 0.8  |
| 652 | IL4R      | Interleukin 4 Receptor                                               | Protein Coding | 47 | GC16P027325 | 0.8  |
| 653 | USP7      | Ubiquitin Specific Peptidase 7                                       | Protein Coding | 47 | GC16M008892 | 0.8  |
| 654 | TNC       | Tenascin C                                                           | Protein Coding | 47 | GC09M115019 | 0.8  |
| 655 | CYBA      | Cytochrome B-245 Alpha Chain                                         | Protein Coding | 46 | GC16M088643 | 0.8  |
| 656 | TYMP      | Thymidine Phosphorylase                                              | Protein Coding | 46 | GC22M050525 | 0.8  |
| 657 | CD79A     | CD79a Molecule                                                       | Protein Coding | 46 | GC19P041877 | 0.8  |
| 658 | CARD11    | Caspase Recruitment Domain Family Member 11                          | Protein Coding | 46 | GC07M002912 | 0.8  |
| 659 | OGT       | O-Linked N-Acetylglucosamine (GlcNAc) Transferase                    | Protein Coding | 45 | GC0XP071534 | 0.8  |
| 660 | BCL10     | BCL10 Immune Signaling Adaptor                                       | Protein Coding | 45 | GC01M085265 | 0.8  |
| 661 | EZR       | Ezrin                                                                | Protein Coding | 45 | GC06M158765 | 0.8  |
| 662 | TIMP2     | TIMP Metallopeptidase Inhibitor 2                                    | Protein Coding | 44 | GC17M078852 | 0.8  |
| 663 | S100A4    | S100 Calcium Binding Protein A4                                      | Protein Coding | 44 | GC01M153543 | 0.8  |
| 664 | BTC       | Betacellulin                                                         | Protein Coding | 44 | GC04M074744 | 0.8  |
| 665 | HAVCR2    | Hepatitis A Virus Cellular Receptor 2                                | Protein Coding | 43 | GC05M157063 | 0.8  |
| 666 | BMI1      | BMI1 Proto-Oncogene, Polycomb Ring Finger                            | Protein Coding | 43 | GC10P022326 | 0.8  |
| 667 | BAG1      | BAG Cochaperone 1                                                    | Protein Coding | 43 | GC09M033245 | 0.8  |
| 668 | CEACAM1   | CEA Cell Adhesion Molecule 1                                         | Protein Coding | 42 | GC19M042507 | 0.8  |
| 669 | SLC7A2    | Solute Carrier Family 7 Member 2                                     | Protein Coding | 42 | GC08P017497 | 0.8  |
| 670 | ACTR2     | Actin Related Protein 2                                              | Protein Coding | 42 | GC02P065227 | 0.8  |
| 671 | ACTR3     | Actin Related Protein 3                                              | Protein Coding | 42 | GC02P113889 | 0.8  |
| 672 | S100A2    | S100 Calcium Binding Protein A2                                      | Protein Coding | 41 | GC01M153561 | 0.8  |
| 673 | MAGI1     | Membrane Associated Guanylate Kinase, WW And PDZ Domain Containing 1 | Protein Coding | 41 | GC03M065330 | 0.8  |
| 674 | VTCN1     | V-Set Domain Containing T Cell Activation Inhibitor 1                | Protein Coding | 40 | GC01M117143 | 0.8  |
| 675 | CD276     | CD276 Molecule                                                       | Protein Coding | 40 | GC15P073683 | 0.8  |
| 676 | UCN       | Urocortin                                                            | Protein Coding | 38 | GC02M027308 | 0.8  |
| 677 | MAGI3     | Membrane Associated Guanylate Kinase, WW And PDZ Domain Containing 3 | Protein Coding | 35 | GC01P113390 | 0.8  |
| 678 | MIR24-2   | MicroRNA 24-2                                                        | RNA Gene       | 16 | GC19M013986 | 0.8  |
| 679 | CYBB      | Cytochrome B-245 Beta Chain                                          | Protein Coding | 47 | GC0XP037780 | 0.77 |
| 680 | AKR1A1    | Aldo-Keto Reductase Family 1 Member A1                               | Protein Coding | 43 | GC01P045550 | 0.77 |
| 681 | HDAC6     | Histone Deacetylase 6                                                | Protein Coding | 52 | GC0XP048801 | 0.74 |
| 682 | SRC       | SRC Proto-Oncogene, Non-Receptor Tyrosine Kinase                     | Protein Coding | 52 | GC20P037344 | 0.74 |
| 683 | PLA2G4A   | Phospholipase A2 Group IVA                                           | Protein Coding | 49 | GC01P186798 | 0.74 |
| 684 | CHRM3     | Cholinergic Receptor Muscarinic 3                                    | Protein Coding | 48 | GC01P239386 | 0.74 |
| 685 | HSP90AA1  | Heat Shock Protein 90 Alpha Family Class A Member 1                  | Protein Coding | 48 | GC14M102080 | 0.74 |
| 686 | DAPK1     | Death Associated Protein Kinase 1                                    | Protein Coding | 48 | GC09P087497 | 0.74 |
| 687 | GLI1      | GLI Family Zinc Finger 1                                             | Protein Coding | 47 | GC12P057460 | 0.74 |
| 688 | TP63      | Tumor Protein P63                                                    | Protein Coding | 47 | GC03P189566 | 0.74 |
| 689 | IFIH1     | Interferon Induced With Helicase C Domain 1                          | Protein Coding | 47 | GC02M162267 | 0.74 |
| 690 | FPR1      | Formyl Peptide Receptor 1                                            | Protein Coding | 47 | GC19M051745 | 0.74 |

|     |            |                                                       |                |    |              |      |
|-----|------------|-------------------------------------------------------|----------------|----|--------------|------|
| 691 | PLA2G1B    | Phospholipase A2 Group IB                             | Protein Coding | 46 | GC12M120322  | 0.74 |
| 692 | CASP4      | Caspase 4                                             | Protein Coding | 46 | GC11M104942  | 0.74 |
| 693 | BIRC3      | Baculoviral IAP Repeat Containing 3                   | Protein Coding | 46 | GC11P102317  | 0.74 |
| 694 | ENG        | Endoglin                                              | Protein Coding | 46 | GC09M127815  | 0.74 |
| 695 | POU2F1     | POU Class 2 Homeobox 1                                | Protein Coding | 45 | GC01P167190  | 0.74 |
| 696 | PIAS1      | Protein Inhibitor Of Activated STAT 1                 | Protein Coding | 45 | GC15P068054  | 0.74 |
| 697 | BRD4       | Bromodomain Containing 4                              | Protein Coding | 45 | GC19M015236  | 0.74 |
| 698 | SFTPD      | Surfactant Protein D                                  | Protein Coding | 44 | GC10M079937  | 0.74 |
| 699 | HSD17B2    | Hydroxysteroid 17-Beta Dehydrogenase 2                | Protein Coding | 44 | GC16P082068  | 0.74 |
| 700 | CD34       | CD34 Molecule                                         | Protein Coding | 44 | GC01M207880  | 0.74 |
| 701 | CXCR1      | C-X-C Motif Chemokine Receptor 1                      | Protein Coding | 43 | GC02M218162  | 0.74 |
| 702 | HSPA1L     | Heat Shock Protein Family A (Hsp70) Member 1 Like     | Protein Coding | 43 | GC06M031809  | 0.74 |
| 703 | PPP1R1B    | Protein Phosphatase 1 Regulatory Inhibitor Subunit 1B | Protein Coding | 43 | GC17P039626  | 0.74 |
| 704 | THBS4      | Thrombospondin 4                                      | Protein Coding | 42 | GC05P079991  | 0.74 |
| 705 | LIPF       | Lipase F, Gastric Type                                | Protein Coding | 42 | GC10P088664  | 0.74 |
| 706 | CD63       | CD63 Molecule                                         | Protein Coding | 42 | GC12M055725  | 0.74 |
| 707 | FGF7       | Fibroblast Growth Factor 7                            | Protein Coding | 42 | GC15P049423  | 0.74 |
| 708 | CXCR5      | C-X-C Motif Chemokine Receptor 5                      | Protein Coding | 41 | GC11P118892  | 0.74 |
| 709 | CXCL13     | C-X-C Motif Chemokine Ligand 13                       | Protein Coding | 41 | GC04P077511  | 0.74 |
| 710 | HCRT       | Hypocretin Neuropeptide Precursor                     | Protein Coding | 41 | GC17M042185  | 0.74 |
| 711 | DROSHA     | Drosha Ribonuclease III                               | Protein Coding | 41 | GC05M031401  | 0.74 |
| 712 | REG4       | Regenerating Family Member 4                          | Protein Coding | 40 | GC01M119794  | 0.74 |
| 713 | CCNC       | Cyclin C                                              | Protein Coding | 40 | GC06M099542  | 0.74 |
| 714 | HOXB7      | Homeobox B7                                           | Protein Coding | 40 | GC17M048607  | 0.74 |
| 715 | FOXD3      | Forkhead Box D3                                       | Protein Coding | 39 | GC01P063323  | 0.74 |
| 716 | MAGEA1     | MAGE Family Member A1                                 | Protein Coding | 38 | GC0XP153179  | 0.74 |
| 717 | IRGM       | Immunity Related GTPase M                             | Protein Coding | 37 | GC05P150846  | 0.74 |
| 718 | OMP        | Olfactory Marker Protein                              | Protein Coding | 37 | GC11P077102  | 0.74 |
| 719 | ABHD11     | Abhydrolase Domain Containing 11                      | Protein Coding | 37 | GC07M073736  | 0.74 |
| 720 | GPR162     | G Protein-Coupled Receptor 162                        | Protein Coding | 36 | GC12P006821  | 0.74 |
| 721 | CDR1       | Cerebellar Degeneration Related Protein 1             | Protein Coding | 31 | GC0XM140782  | 0.74 |
| 722 | CD24       | CD24 Molecule                                         | Protein Coding | 30 | GC06M106969  | 0.74 |
| 723 | NKX6-3     | NK6 Homeobox 3                                        | Protein Coding | 28 | GC08M0041645 | 0.74 |
| 724 | MIR133A1   | MicroRNA 133a-1                                       | RNA Gene       | 15 | GC18M021826  | 0.74 |
| 725 | ABHD11-AS1 | ABHD11 Antisense RNA 1 (Tail To Tail)                 | RNA Gene       | 15 | GC07P073735  | 0.74 |
| 726 | HDAC2      | Histone Deacetylase 2                                 | Protein Coding | 52 | GC06M113933  | 0.65 |
| 727 | ARG1       | Arginase 1                                            | Protein Coding | 50 | GC06P131473  | 0.65 |
| 728 | FN1        | Fibronectin 1                                         | Protein Coding | 50 | GC02M215360  | 0.65 |
| 729 | AURKA      | Aurora Kinase A                                       | Protein Coding | 50 | GC20M056370  | 0.65 |
| 730 | STK11      | Serine/Threonine Kinase 11                            | Protein Coding | 49 | GC19P001177  | 0.65 |
| 731 | PRKCZ      | Protein Kinase C Zeta                                 | Protein Coding | 48 | GC01P002050  | 0.65 |
| 732 | CD40       | CD40 Molecule                                         | Protein Coding | 48 | GC20P046118  | 0.65 |
| 733 | TCF7L2     | Transcription Factor 7 Like 2                         | Protein Coding | 47 | GC10P112950  | 0.65 |
| 734 | CD3E       | CD3e Molecule                                         | Protein Coding | 47 | GC11P118304  | 0.65 |
| 735 | EDN1       | Endothelin 1                                          | Protein Coding | 47 | GC06P012290  | 0.65 |
| 736 | EEF2K      | Eukaryotic Elongation Factor 2 Kinase                 | Protein Coding | 47 | GC16P022217  | 0.65 |
| 737 | PRDX2      | Peroxiredoxin 2                                       | Protein Coding | 46 | GC19M012796  | 0.65 |
| 738 | STAT4      | Signal Transducer And Activator Of Transcription 4    | Protein Coding | 46 | GC02M191029  | 0.65 |
| 739 | ARG2       | Arginase 2                                            | Protein Coding | 46 | GC14P067619  | 0.65 |
| 740 | IL12RB1    | Interleukin 12 Receptor Subunit Beta 1                | Protein Coding | 45 | GC19M018030  | 0.65 |
| 741 | CSF2       | Colony Stimulating Factor 2                           | Protein Coding | 44 | GC05P132073  | 0.65 |
| 742 | MMP24      | Matrix Metallopeptidase 24                            | Protein Coding | 44 | GC20P035226  | 0.65 |
| 743 | FOXM1      | Forkhead Box M1                                       | Protein Coding | 44 | GC12M002857  | 0.65 |
| 744 | HP         | Haptoglobin                                           | Protein Coding | 44 | GC16P072089  | 0.65 |
| 745 | HOXA1      | Homeobox A1                                           | Protein Coding | 43 | GC07M027092  | 0.65 |
| 746 | MMP12      | Matrix Metallopeptidase 12                            | Protein Coding | 43 | GC11M102862  | 0.65 |
| 747 | GJA4       | Gap Junction Protein Alpha 4                          | Protein Coding | 43 | GC01P034792  | 0.65 |
| 748 | CHIT1      | Chitinase 1                                           | Protein Coding | 43 | GC01M203181  | 0.65 |
| 749 | IL12RB2    | Interleukin 12 Receptor Subunit Beta 2                | Protein Coding | 43 | GC01P067307  | 0.65 |
| 750 | KLF5       | Kruppel Like Factor 5                                 | Protein Coding | 43 | GC13P073054  | 0.65 |
| 751 | TNFRSF8    | TNF Receptor Superfamily Member 8                     | Protein Coding | 43 | GC01P012063  | 0.65 |
| 752 | IL9        | Interleukin 9                                         | Protein Coding | 43 | GC05M135891  | 0.65 |
| 753 | HOXA10     | Homeobox A10                                          | Protein Coding | 42 | GC07M027229  | 0.65 |
| 754 | CEACAM5    | CEA Cell Adhesion Molecule 5                          | Protein Coding | 42 | GC19P041709  | 0.65 |
| 755 | TERF1      | Telomeric Repeat Binding Factor 1                     | Protein Coding | 42 | GC08P073003  | 0.65 |
| 756 | NR0B2      | Nuclear Receptor Subfamily 0 Group B Member 2         | Protein Coding | 42 | GC01M026922  | 0.65 |
| 757 | SATB1      | SATB Homeobox 1                                       | Protein Coding | 42 | GC03M018364  | 0.65 |
| 758 | IGF2BP3    | Insulin Like Growth Factor 2 mRNA Binding Protein 3   | Protein Coding | 42 | GC07M023316  | 0.65 |
| 759 | CLDN5      | Claudin 5                                             | Protein Coding | 41 | GC22M019523  | 0.65 |
| 760 | HSP1       | Heat Shock Protein Family E (Hsp10) Member 1          | Protein Coding | 40 | GC02P197501  | 0.65 |
| 761 | MMP25      | Matrix Metallopeptidase 25                            | Protein Coding | 39 | GC16P004057  | 0.65 |
| 762 | LLGL2      | LLGL Scribble Cell Polarity Complex Component 2       | Protein Coding | 39 | GC17P075525  | 0.65 |
| 763 | GATA5      | GATA Binding Protein 5                                | Protein Coding | 39 | GC20M062464  | 0.65 |
| 764 | LAMP3      | Lysosomal Associated Membrane Protein 3               | Protein Coding | 38 | GC03M183122  | 0.65 |
| 765 | NOXA1      | NADPH Oxidase Activator 1                             | Protein Coding | 38 | GC09P137423  | 0.65 |
| 766 | NOXO1      | NADPH Oxidase Organizer 1                             | Protein Coding | 38 | GC16M002164  | 0.65 |
| 767 | TRIM31     | Tripartite Motif Containing 31                        | Protein Coding | 37 | GC06M030652  | 0.65 |

|     |            |                                                          |                   |    |             |      |
|-----|------------|----------------------------------------------------------|-------------------|----|-------------|------|
| 768 | NTAN1      | N-Terminal Asparagine Amidase                            | Protein Coding    | 36 | GC16M015037 | 0.65 |
| 769 | TIFA       | TRAF Interacting Protein With Forkhead Associated Domain | Protein Coding    | 35 | GC04M112274 | 0.65 |
| 770 | RIOX2      | Ribosomal Oxygenase 2                                    | Protein Coding    | 31 | GC03M097942 | 0.65 |
| 771 | DEFB103B   | Defensin Beta 103B                                       | Protein Coding    | 30 | GC08M007430 | 0.65 |
| 772 | MIR370     | MicroRNA 370                                             | RNA Gene          | 19 | GC14P104253 | 0.65 |
| 773 | TF         | Transferrin                                              | Protein Coding    | 49 | GC03P133666 | 0.63 |
| 774 | DUOX2      | Dual Oxidase 2                                           | Protein Coding    | 43 | GC15M045092 | 0.63 |
| 775 | MOS        | MOS Proto-Oncogene, Serine/Threonine Kinase              | Protein Coding    | 39 | GC08M056112 | 0.63 |
| 776 | LPO        | Lactoperoxidase                                          | Protein Coding    | 38 | GC17P058218 | 0.63 |
| 777 | DMBT1      | Deleted In Malignant Brain Tumors 1                      | Protein Coding    | 41 | GC10P122560 | 0.46 |
| 778 | FUBP1      | Far Upstream Element Binding Protein 1                   | Protein Coding    | 39 | GC01M077944 | 0.46 |
| 779 | IFI27      | Interferon Alpha Inducible Protein 27                    | Protein Coding    | 38 | GC14P094104 | 0.46 |
| 780 | MIRLET7C   | MicroRNA Let-7c                                          | RNA Gene          | 19 | GC21P016553 | 0.46 |
| 781 | LOC1113651 | NOS2 5' Regulatory Region                                | Biological Region | 2  | GC17U902748 | 0.46 |
| 782 | MMP14      | Matrix Metallopeptidase 14                               | Protein Coding    | 51 | GC14P025005 | 0.44 |
| 783 | DNMT1      | DNA Methyltransferase 1                                  | Protein Coding    | 51 | GC19M010133 | 0.44 |
| 784 | DNMT3A     | DNA Methyltransferase 3 Alpha                            | Protein Coding    | 51 | GC02M025228 | 0.44 |
| 785 | CHEK1      | Checkpoint Kinase 1                                      | Protein Coding    | 50 | GC11P125625 | 0.44 |
| 786 | PRKCH      | Protein Kinase C Eta                                     | Protein Coding    | 50 | GC14P061187 | 0.44 |
| 787 | SYK        | Spleen Associated Tyrosine Kinase                        | Protein Coding    | 50 | GC09P091113 | 0.44 |
| 788 | SNCA       | Synuclein Alpha                                          | Protein Coding    | 50 | GC04M089724 | 0.44 |
| 789 | G6PD       | Glucose-6-Phosphate Dehydrogenase                        | Protein Coding    | 50 | GC0XM154531 | 0.44 |
| 790 | TTR        | Transthyretin                                            | Protein Coding    | 49 | GC18P031557 | 0.44 |
| 791 | PLK1       | Polo Like Kinase 1                                       | Protein Coding    | 49 | GC16P023869 | 0.44 |
| 792 | NOTCH3     | Notch Receptor 3                                         | Protein Coding    | 49 | GC19M015159 | 0.44 |
| 793 | DNMT3B     | DNA Methyltransferase 3 Beta                             | Protein Coding    | 49 | GC20P032762 | 0.44 |
| 794 | ZEB1       | Zinc Finger E-Box Binding Homeobox 1                     | Protein Coding    | 48 | GC10P031318 | 0.44 |
| 795 | SLC6A4     | Solute Carrier Family 6 Member 4                         | Protein Coding    | 48 | GC17M030194 | 0.44 |
| 796 | CYP2A6     | Cytochrome P450 Family 2 Subfamily A Member 6            | Protein Coding    | 47 | GC19M040843 | 0.44 |
| 797 | TKT        | Transketolase                                            | Protein Coding    | 47 | GC03M053224 | 0.44 |
| 798 | TCF4       | Transcription Factor 4                                   | Protein Coding    | 46 | GC18M055222 | 0.44 |
| 799 | TNFRSF10A  | TNF Receptor Superfamily Member 10a                      | Protein Coding    | 45 | GC08M023190 | 0.44 |
| 800 | LAMA1      | Laminin Subunit Alpha 1                                  | Protein Coding    | 45 | GC18M006941 | 0.44 |
| 801 | F3         | Coagulation Factor III, Tissue Factor                    | Protein Coding    | 45 | GC01M094530 | 0.44 |
| 802 | RORC       | RAR Related Orphan Receptor C                            | Protein Coding    | 45 | GC01M151806 | 0.44 |
| 803 | BDKRB2     | Bradykinin Receptor B2                                   | Protein Coding    | 45 | GC14P096205 | 0.44 |
| 804 | HES1       | Hes Family BHLH Transcription Factor 1                   | Protein Coding    | 44 | GC03P194136 | 0.44 |
| 805 | GLP2R      | Glucagon Like Peptide 2 Receptor                         | Protein Coding    | 44 | GC17P009822 | 0.44 |
| 806 | TNFSF13    | TNF Superfamily Member 13                                | Protein Coding    | 44 | GC17P007558 | 0.44 |
| 807 | SERPINB2   | Serpin Family B Member 2                                 | Protein Coding    | 44 | GC18P063871 | 0.44 |
| 808 | SOCS3      | Suppressor Of Cytokine Signaling 3                       | Protein Coding    | 44 | GC17M078356 | 0.44 |
| 809 | SOCS2      | Suppressor Of Cytokine Signaling 2                       | Protein Coding    | 43 | GC12P093569 | 0.44 |
| 810 | BDKRB1     | Bradykinin Receptor B1                                   | Protein Coding    | 43 | GC14P096260 | 0.44 |
| 811 | HMMR       | Hyaluronan Mediated Motility Receptor                    | Protein Coding    | 42 | GC05P163480 | 0.44 |
| 812 | IL21R      | Interleukin 21 Receptor                                  | Protein Coding    | 42 | GC16P027413 | 0.44 |
| 813 | PPIG       | Peptidylprolyl Isomerase G                               | Protein Coding    | 42 | GC02P169584 | 0.44 |
| 814 | ARNTL      | Aryl Hydrocarbon Receptor Nuclear Translocator Like      | Protein Coding    | 42 | GC11P013276 | 0.44 |
| 815 | LIN28A     | Lin-28 Homolog A                                         | Protein Coding    | 41 | GC01P026410 | 0.44 |
| 816 | NMB        | Neuromedin B                                             | Protein Coding    | 41 | GC15M084655 | 0.44 |
| 817 | AAAS       | Aladin WD Repeat Nucleoporin                             | Protein Coding    | 41 | GC12M053307 | 0.44 |
| 818 | LAPTM4B    | Lysosomal Protein Transmembrane 4 Beta                   | Protein Coding    | 39 | GC08P097775 | 0.44 |
| 819 | TXNDC5     | Thioredoxin Domain Containing 5                          | Protein Coding    | 39 | GC06M007893 | 0.44 |
| 820 | ERGIC1     | Endoplasmic Reticulum-Golgi Intermediate Compartment 1   | Protein Coding    | 39 | GC05P172834 | 0.44 |
| 821 | CEACAM7    | CEA Cell Adhesion Molecule 7                             | Protein Coding    | 37 | GC19M041673 | 0.44 |
| 822 | APLN       | Apelin                                                   | Protein Coding    | 37 | GC0XM129645 | 0.44 |
| 823 | ADGRB1     | Adhesion G Protein-Coupled Receptor B1                   | Protein Coding    | 34 | GC08P142449 | 0.44 |
| 824 | MPIG6B     | Megakaryocyte And Platelet Inhibitory Receptor G6b       | Protein Coding    | 31 | GC06P033627 | 0.44 |
| 825 | MIR503     | MicroRNA 503                                             | RNA Gene          | 15 | GC0XM134624 | 0.44 |
| 826 | MIR421     | MicroRNA 421                                             | RNA Gene          | 12 | GC0XM074218 | 0.44 |
| 827 | XS         | X-Linked Suppressor Of LU Antigens                       | Genetic Locus     | 5  | GC0XU990239 | 0.44 |
| 828 | LOC1108062 | Solute Carrier Family 6 Member 4 Gene Promoter           | Biological Region | 2  | GC17U902739 | 0.44 |
| 829 | HNF4A      | Hepatocyte Nuclear Factor 4 Alpha                        | Protein Coding    | 50 | GC20P044355 | 0.41 |
| 830 | RB1        | RB Transcriptional Corepressor 1                         | Protein Coding    | 49 | GC13P048303 | 0.41 |
| 831 | CAV1       | Caveolin 1                                               | Protein Coding    | 48 | GC07P116524 | 0.41 |
| 832 | SYP        | Synaptophysin                                            | Protein Coding    | 43 | GC0XM049187 | 0.41 |
| 833 | SMAD7      | SMAD Family Member 7                                     | Protein Coding    | 43 | GC18M048919 | 0.41 |
| 834 | MAP2K1     | Mitogen-Activated Protein Kinase Kinase 1                | Protein Coding    | 54 | GC15P066386 | 0.36 |
| 835 | ABL1       | ABL Proto-Oncogene 1, Non-Receptor Tyrosine Kinase       | Protein Coding    | 53 | GC09P130713 | 0.36 |
| 836 | TGFB2      | Transforming Growth Factor Beta Receptor 2               | Protein Coding    | 52 | GC03P030623 | 0.36 |
| 837 | NOTCH1     | Notch Receptor 1                                         | Protein Coding    | 51 | GC09M136582 | 0.36 |
| 838 | CCND2      | Cyclin D2                                                | Protein Coding    | 50 | GC12P006576 | 0.36 |
| 839 | IGF1       | Insulin Like Growth Factor 1                             | Protein Coding    | 49 | GC12M102395 | 0.36 |
| 840 | NOTCH2     | Notch Receptor 2                                         | Protein Coding    | 49 | GC01M119911 | 0.36 |
| 841 | SMAD3      | SMAD Family Member 3                                     | Protein Coding    | 48 | GC15P067063 | 0.36 |
| 842 | HIF1A      | Hypoxia Inducible Factor 1 Subunit Alpha                 | Protein Coding    | 47 | GC14P061695 | 0.36 |
| 843 | CDKN2B     | Cyclin Dependent Kinase Inhibitor 2B                     | Protein Coding    | 47 | GC09M022002 | 0.36 |
| 844 | IGF2       | Insulin Like Growth Factor 2                             | Protein Coding    | 47 | GC11M002130 | 0.36 |

|     |           |                                                                          |                |    |             |      |
|-----|-----------|--------------------------------------------------------------------------|----------------|----|-------------|------|
| 845 | YAP1      | Yes Associated Protein 1                                                 | Protein Coding | 47 | GC11P102110 | 0.36 |
| 846 | ENO2      | Enolase 2                                                                | Protein Coding | 47 | GC12P006913 | 0.36 |
| 847 | FGF2      | Fibroblast Growth Factor 2                                               | Protein Coding | 47 | GC04P122826 | 0.36 |
| 848 | COL4A3    | Collagen Type IV Alpha 3 Chain                                           | Protein Coding | 45 | GC02P227164 | 0.36 |
| 849 | CD274     | CD274 Molecule                                                           | Protein Coding | 45 | GC09P005450 | 0.36 |
| 850 | LCN2      | Lipocalin 2                                                              | Protein Coding | 44 | GC09P128149 | 0.36 |
| 851 | MBD3      | Methyl-CpG Binding Domain Protein 3                                      | Protein Coding | 42 | GC19M001690 | 0.36 |
| 852 | IL17F     | Interleukin 17F                                                          | Protein Coding | 41 | GC06M052209 | 0.36 |
| 853 | MBD2      | Methyl-CpG Binding Domain Protein 2                                      | Protein Coding | 41 | GC18M054151 | 0.36 |
| 854 | BIRC7     | Baculoviral IAP Repeat Containing 7                                      | Protein Coding | 40 | GC20P063235 | 0.36 |
| 855 | PCDH10    | Protocadherin 10                                                         | Protein Coding | 39 | GC04P133149 | 0.36 |
| 856 | MUC7      | Mucin 7, Secreted                                                        | Protein Coding | 38 | GC04P070430 | 0.36 |
| 857 | A4GNT     | Alpha-1,4-N-Acetylglucosaminyltransferase                                | Protein Coding | 35 | GC03M138123 | 0.36 |
| 858 | MIR137    | MicroRNA 137                                                             | RNA Gene       | 16 | GC01M098046 | 0.36 |
| 859 | ITGB2     | Integrin Subunit Beta 2                                                  | Protein Coding | 50 | GC21M044885 | 0.29 |
| 860 | VIM       | Vimentin                                                                 | Protein Coding | 50 | GC10P017227 | 0.29 |
| 861 | MYD88     | MYD88 Innate Immune Signal Transduction Adaptor                          | Protein Coding | 50 | GC03P038179 | 0.29 |
| 862 | PTK2B     | Protein Tyrosine Kinase 2 Beta                                           | Protein Coding | 49 | GC08P027311 | 0.29 |
| 863 | GATA3     | GATA Binding Protein 3                                                   | Protein Coding | 49 | GC10P008045 | 0.29 |
| 864 | CD247     | CD247 Molecule                                                           | Protein Coding | 49 | GC01M167399 | 0.29 |
| 865 | AHR       | Aryl Hydrocarbon Receptor                                                | Protein Coding | 49 | GC07P016916 | 0.29 |
| 866 | CBS       | Cystathionine Beta-Synthase                                              | Protein Coding | 48 | GC21M043053 | 0.29 |
| 867 | GRN       | Granulin Precursor                                                       | Protein Coding | 47 | GC17P044345 | 0.29 |
| 868 | TRAF6     | TNF Receptor Associated Factor 6                                         | Protein Coding | 47 | GC11M036467 | 0.29 |
| 869 | PTK2      | Protein Tyrosine Kinase 2                                                | Protein Coding | 47 | GC08M140657 | 0.29 |
| 870 | GPX1      | Glutathione Peroxidase 1                                                 | Protein Coding | 47 | GC03M049370 | 0.29 |
| 871 | CASP9     | Caspase 9                                                                | Protein Coding | 47 | GC01M015491 | 0.29 |
| 872 | MCL1      | MCL1 Apoptosis Regulator, BCL2 Family Member                             | Protein Coding | 47 | GC01M150673 | 0.29 |
| 873 | KLK3      | Kallikrein Related Peptidase 3                                           | Protein Coding | 46 | GC19P050854 | 0.29 |
| 874 | VHL       | Von Hippel-Lindau Tumor Suppressor                                       | Protein Coding | 46 | GC03P010205 | 0.29 |
| 875 | F2R       | Coagulation Factor II Thrombin Receptor                                  | Protein Coding | 46 | GC05P076716 | 0.29 |
| 876 | NPPA      | Natriuretic Peptide A                                                    | Protein Coding | 46 | GC01M011846 | 0.29 |
| 877 | BAD       | BCL2 Associated Agonist Of Cell Death                                    | Protein Coding | 46 | GC11M064273 | 0.29 |
| 878 | PIK3C2A   | Phosphatidylinositol-4-Phosphate 3-Kinase Catalytic Subunit Type 2 Alpha | Protein Coding | 45 | GC11M017165 | 0.29 |
| 879 | IDO1      | Indoleamine 2,3-Dioxygenase 1                                            | Protein Coding | 45 | GC08P039891 | 0.29 |
| 880 | F5        | Coagulation Factor V                                                     | Protein Coding | 45 | GC01M169511 | 0.29 |
| 881 | WNT2      | Wnt Family Member 2                                                      | Protein Coding | 44 | GC07M117276 | 0.29 |
| 882 | CD9       | CD9 Molecule                                                             | Protein Coding | 44 | GC12P006594 | 0.29 |
| 883 | ITGAX     | Integrin Subunit Alpha X                                                 | Protein Coding | 43 | GC16P031432 | 0.29 |
| 884 | IRF4      | Interferon Regulatory Factor 4                                           | Protein Coding | 43 | GC06P000391 | 0.29 |
| 885 | PYY       | Peptide YY                                                               | Protein Coding | 43 | GC17M043952 | 0.29 |
| 886 | LGR5      | Leucine Rich Repeat Containing G Protein-Coupled Receptor 5              | Protein Coding | 43 | GC12P071439 | 0.29 |
| 887 | PAM       | Peptidylglycine Alpha-Amidating Monooxygenase                            | Protein Coding | 43 | GC05P102753 | 0.29 |
| 888 | MAP3K14   | Mitogen-Activated Protein Kinase Kinase 14                               | Protein Coding | 43 | GC17M045263 | 0.29 |
| 889 | BMP6      | Bone Morphogenetic Protein 6                                             | Protein Coding | 43 | GC06P007726 | 0.29 |
| 890 | MARK2     | Microtubule Affinity Regulating Kinase 2                                 | Protein Coding | 43 | GC11P063838 | 0.29 |
| 891 | LTBR      | Lymphotoxin Beta Receptor                                                | Protein Coding | 42 | GC12P006375 | 0.29 |
| 892 | CHGB      | Chromogranin B                                                           | Protein Coding | 41 | GC20P005911 | 0.29 |
| 893 | IL1RL1    | Interleukin 1 Receptor Like 1                                            | Protein Coding | 41 | GC02P102294 | 0.29 |
| 894 | TUSC3     | Tumor Suppressor Candidate 3                                             | Protein Coding | 41 | GC08P015417 | 0.29 |
| 895 | REG1A     | Regenerating Family Member 1 Alpha                                       | Protein Coding | 41 | GC02P079120 | 0.29 |
| 896 | GPT       | Glutamic--Pyruvic Transaminase                                           | Protein Coding | 41 | GC08P144502 | 0.29 |
| 897 | CCL4      | C-C Motif Chemokine Ligand 4                                             | Protein Coding | 41 | GC17P036103 | 0.29 |
| 898 | BCL9      | BCL9 Transcription Coactivator                                           | Protein Coding | 41 | GC01P147541 | 0.29 |
| 899 | UBD       | Ubiquitin D                                                              | Protein Coding | 39 | GC06M029556 | 0.29 |
| 900 | NTS       | Neurotensin                                                              | Protein Coding | 39 | GC12P085876 | 0.29 |
| 901 | PCDH17    | Protocadherin 17                                                         | Protein Coding | 36 | GC13P057630 | 0.29 |
| 902 | DEFA6     | Defensin Alpha 6                                                         | Protein Coding | 36 | GC08M006924 | 0.29 |
| 903 | MLN       | Motilin                                                                  | Protein Coding | 35 | GC06M033794 | 0.29 |
| 904 | ZNF318    | Zinc Finger Protein 318                                                  | Protein Coding | 35 | GC06M043309 | 0.29 |
| 905 | TNFAIP8L2 | TNF Alpha Induced Protein 8 Like 2                                       | Protein Coding | 34 | GC01P151129 | 0.29 |
| 906 | RPRM      | Reprimo, TP53 Dependent G2 Arrest Mediator Homolog                       | Protein Coding | 33 | GC02M153477 | 0.29 |
| 907 | SLFN5     | Schlafen Family Member 5                                                 | Protein Coding | 32 | GC17P035243 | 0.29 |
| 908 | MIR499A   | MicroRNA 499a                                                            | RNA Gene       | 20 | GC20P034990 | 0.29 |
| 909 | MIR34B    | MicroRNA 34b                                                             | RNA Gene       | 19 | GC11P111578 | 0.29 |
| 910 | MIR210    | MicroRNA 210                                                             | RNA Gene       | 19 | GC11M000622 | 0.29 |
| 911 | MIR222    | MicroRNA 222                                                             | RNA Gene       | 19 | GC0XM045747 | 0.29 |
| 912 | MIR223    | MicroRNA 223                                                             | RNA Gene       | 19 | GC0XP066018 | 0.29 |
| 913 | MIR196A2  | MicroRNA 196a-2                                                          | RNA Gene       | 19 | GC12P054167 | 0.29 |
| 914 | MIR9-3    | MicroRNA 9-3                                                             | RNA Gene       | 17 | GC15P089363 | 0.29 |
| 915 | MIR129-2  | MicroRNA 129-2                                                           | RNA Gene       | 16 | GC11P043633 | 0.29 |
| 916 | TGFB R1   | Transforming Growth Factor Beta Receptor 1                               | Protein Coding | 53 | GC09P099104 | 0.21 |
| 917 | IKKBK     | Inhibitor Of Nuclear Factor Kappa B Kinase Subunit Beta                  | Protein Coding | 53 | GC08P042271 | 0.21 |
| 918 | MAP2K2    | Mitogen-Activated Protein Kinase Kinase 2                                | Protein Coding | 53 | GC19M004090 | 0.21 |
| 919 | AR        | Androgen Receptor                                                        | Protein Coding | 53 | GC0XP067544 | 0.21 |
| 920 | UCHL1     | Ubiquitin C-Terminal Hydrolase L1                                        | Protein Coding | 52 | GC04P041256 | 0.21 |
| 921 | SLC2A1    | Solute Carrier Family 2 Member 1                                         | Protein Coding | 52 | GC01M042925 | 0.21 |

|     |          |                                                                        |                |    |             |      |
|-----|----------|------------------------------------------------------------------------|----------------|----|-------------|------|
| 922 | VDR      | Vitamin D Receptor                                                     | Protein Coding | 52 | GC12M047841 | 0.21 |
| 923 | PIK3CA   | Phosphatidylinositol-4,5-Bisphosphate 3-Kinase Catalytic Subunit Alpha | Protein Coding | 52 | GC03P179148 | 0.21 |
| 924 | CA2      | Carbonic Anhydrase 2                                                   | Protein Coding | 52 | GC08P085463 | 0.21 |
| 925 | CFTR     | CF Transmembrane Conductance Regulator                                 | Protein Coding | 51 | GC07P117465 | 0.21 |
| 926 | RAD51    | RAD51 Recombinase                                                      | Protein Coding | 51 | GC15P040694 | 0.21 |
| 927 | MAP3K7   | Mitogen-Activated Protein Kinase Kinase Kinase 7                       | Protein Coding | 51 | GC06M090513 | 0.21 |
| 928 | ALK      | ALK Receptor Tyrosine Kinase                                           | Protein Coding | 51 | GC02M029156 | 0.21 |
| 929 | CTH      | Cystathionine Gamma-Lyase                                              | Protein Coding | 50 | GC01P070411 | 0.21 |
| 930 | GLUD1    | Glutamate Dehydrogenase 1                                              | Protein Coding | 50 | GC10M087050 | 0.21 |
| 931 | ITGB1    | Integrin Subunit Beta 1                                                | Protein Coding | 50 | GC10M032900 | 0.21 |
| 932 | TGFB2    | Transforming Growth Factor Beta 2                                      | Protein Coding | 50 | GC01P218345 | 0.21 |
| 933 | GSK3B    | Glycogen Synthase Kinase 3 Beta                                        | Protein Coding | 50 | GC03M119821 | 0.21 |
| 934 | PGR      | Progesterone Receptor                                                  | Protein Coding | 50 | GC11M100943 | 0.21 |
| 935 | MAPK8    | Mitogen-Activated Protein Kinase 8                                     | Protein Coding | 50 | GC10P048306 | 0.21 |
| 936 | LPL      | Lipoprotein Lipase                                                     | Protein Coding | 50 | GC08P019901 | 0.21 |
| 937 | CYCS     | Cytochrome C, Somatic                                                  | Protein Coding | 49 | GC07M025118 | 0.21 |
| 938 | SQSTM1   | Sequestosome 1                                                         | Protein Coding | 49 | GC05P179806 | 0.21 |
| 939 | PRKDC    | Protein Kinase, DNA-Activated, Catalytic Subunit                       | Protein Coding | 49 | GC08M047773 | 0.21 |
| 940 | IRAK1    | Interleukin 1 Receptor Associated Kinase 1                             | Protein Coding | 49 | GC0XM154010 | 0.21 |
| 941 | NQO1     | NAD(P)H Quinone Dehydrogenase 1                                        | Protein Coding | 49 | GC16M069706 | 0.21 |
| 942 | EPOR     | Erythropoietin Receptor                                                | Protein Coding | 49 | GC19M011377 | 0.21 |
| 943 | MAPK3    | Mitogen-Activated Protein Kinase 3                                     | Protein Coding | 49 | GC16M030117 | 0.21 |
| 944 | CASP6    | Caspase 6                                                              | Protein Coding | 49 | GC04M109688 | 0.21 |
| 945 | CAPN1    | Calpain 1                                                              | Protein Coding | 49 | GC11P065198 | 0.21 |
| 946 | CYP2C9   | Cytochrome P450 Family 2 Subfamily C Member 9                          | Protein Coding | 49 | GC10P094938 | 0.21 |
| 947 | ROCK1    | Rho Associated Coiled-Coil Containing Protein Kinase 1                 | Protein Coding | 49 | GC18M020946 | 0.21 |
| 948 | CTSK     | Cathepsin K                                                            | Protein Coding | 49 | GC01M150796 | 0.21 |
| 949 | AURKB    | Aurora Kinase B                                                        | Protein Coding | 49 | GC17M008770 | 0.21 |
| 950 | AGT      | Angiotensinogen                                                        | Protein Coding | 49 | GC01M230702 | 0.21 |
| 951 | CXCR2    | C-X-C Motif Chemokine Receptor 2                                       | Protein Coding | 48 | GC02P218125 | 0.21 |
| 952 | ITGA5    | Integrin Subunit Alpha 5                                               | Protein Coding | 48 | GC12M054396 | 0.21 |
| 953 | KAT2B    | Lysine Acetyltransferase 2B                                            | Protein Coding | 48 | GC03P020081 | 0.21 |
| 954 | NF1      | Neurofibromin 1                                                        | Protein Coding | 48 | GC17P031007 | 0.21 |
| 955 | CDKN1C   | Cyclin Dependent Kinase Inhibitor 1C                                   | Protein Coding | 47 | GC11M002886 | 0.21 |
| 956 | GPI      | Glucose-6-Phosphate Isomerase                                          | Protein Coding | 47 | GC19P034359 | 0.21 |
| 957 | CSK      | C-Terminal Src Kinase                                                  | Protein Coding | 47 | GC15P074782 | 0.21 |
| 958 | KDM1A    | Lysine Demethylase 1A                                                  | Protein Coding | 47 | GC01P023019 | 0.21 |
| 959 | LDHB     | Lactate Dehydrogenase B                                                | Protein Coding | 47 | GC12M021635 | 0.21 |
| 960 | PDCD1    | Programmed Cell Death 1                                                | Protein Coding | 47 | GC02M241849 | 0.21 |
| 961 | RAB7A    | RAB7A, Member RAS Oncogene Family                                      | Protein Coding | 47 | GC03P128737 | 0.21 |
| 962 | WNT3A    | Wnt Family Member 3A                                                   | Protein Coding | 47 | GC01P228072 | 0.21 |
| 963 | LMNB1    | Lamin B1                                                               | Protein Coding | 47 | GC05P126776 | 0.21 |
| 964 | SERPINC1 | Serpin Family C Member 1                                               | Protein Coding | 47 | GC01M174131 | 0.21 |
| 965 | CLDN1    | Claudin 1                                                              | Protein Coding | 47 | GC03M190305 | 0.21 |
| 966 | PLCB4    | Phospholipase C Beta 4                                                 | Protein Coding | 47 | GC20P009024 | 0.21 |
| 967 | PLCG1    | Phospholipase C Gamma 1                                                | Protein Coding | 47 | GC20P041136 | 0.21 |
| 968 | PNLIP    | Pancreatic Lipase                                                      | Protein Coding | 47 | GC10P116545 | 0.21 |
| 969 | GGT1     | Gamma-Glutamyltransferase 1                                            | Protein Coding | 47 | GC22P024583 | 0.21 |
| 970 | MAP4K4   | Mitogen-Activated Protein Kinase Kinase Kinase Kinase 4                | Protein Coding | 47 | GC02P101773 | 0.21 |
| 971 | CAMK2G   | Calcium/Calmodulin Dependent Protein Kinase II Gamma                   | Protein Coding | 47 | GC10M073812 | 0.21 |
| 972 | MAP3K5   | Mitogen-Activated Protein Kinase Kinase Kinase 5                       | Protein Coding | 47 | GC06M136557 | 0.21 |
| 973 | LRP6     | LDL Receptor Related Protein 6                                         | Protein Coding | 47 | GC12M013402 | 0.21 |
| 974 | DES      | Desmin                                                                 | Protein Coding | 47 | GC02P219418 | 0.21 |
| 975 | ENO1     | Enolase 1                                                              | Protein Coding | 47 | GC01M008861 | 0.21 |
| 976 | NLRP3    | NLR Family Pyrin Domain Containing 3                                   | Protein Coding | 47 | GC01P247415 | 0.21 |
| 977 | EPCAM    | Epithelial Cell Adhesion Molecule                                      | Protein Coding | 47 | GC02P047345 | 0.21 |
| 978 | CUL3     | Cullin 3                                                               | Protein Coding | 46 | GC02M224470 | 0.21 |
| 979 | CNR1     | Cannabinoid Receptor 1                                                 | Protein Coding | 46 | GC06M088139 | 0.21 |
| 980 | CYP1A1   | Cytochrome P450 Family 1 Subfamily A Member 1                          | Protein Coding | 46 | GC15M074719 | 0.21 |
| 981 | TGFB3    | Transforming Growth Factor Beta 3                                      | Protein Coding | 46 | GC14M075958 | 0.21 |
| 982 | PTPN2    | Protein Tyrosine Phosphatase Non-Receptor Type 2                       | Protein Coding | 46 | GC18M016781 | 0.21 |
| 983 | TRAF3    | TNF Receptor Associated Factor 3                                       | Protein Coding | 46 | GC14P104312 | 0.21 |
| 984 | IL1R1    | Interleukin 1 Receptor Type 1                                          | Protein Coding | 46 | GC02P102136 | 0.21 |
| 985 | IL6ST    | Interleukin 6 Signal Transducer                                        | Protein Coding | 46 | GC05M055935 | 0.21 |
| 986 | SLC18A2  | Solute Carrier Family 18 Member A2                                     | Protein Coding | 46 | GC10P117241 | 0.21 |
| 987 | SLC19A1  | Solute Carrier Family 19 Member 1                                      | Protein Coding | 46 | GC21M045493 | 0.21 |
| 988 | SH2B3    | SH2B Adaptor Protein 3                                                 | Protein Coding | 46 | GC12P111405 | 0.21 |
| 989 | SMAD2    | SMAD Family Member 2                                                   | Protein Coding | 46 | GC18M047809 | 0.21 |
| 990 | PHKA2    | Phosphorylase Kinase Regulatory Subunit Alpha 2                        | Protein Coding | 46 | GC0XM018892 | 0.21 |
| 991 | ANXA5    | Annexin A5                                                             | Protein Coding | 46 | GC04M121667 | 0.21 |
| 992 | FUCA1    | Alpha-L-Fucosidase 1                                                   | Protein Coding | 46 | GC01M023845 | 0.21 |
| 993 | DVL3     | Dishevelled Segment Polarity Protein 3                                 | Protein Coding | 46 | GC03P184155 | 0.21 |
| 994 | DLL4     | Delta Like Canonical Notch Ligand 4                                    | Protein Coding | 46 | GC15P040929 | 0.21 |
| 995 | MS4A1    | Membrane Spanning 4-Domains A1                                         | Protein Coding | 46 | GC11P060474 | 0.21 |
| 996 | FCGR2A   | Fc Fragment Of IgG Receptor IIa                                        | Protein Coding | 46 | GC01P161505 | 0.21 |
| 997 | BID      | BH3 Interacting Domain Death Agonist                                   | Protein Coding | 46 | GC22M017734 | 0.21 |
| 998 | AFP      | Alpha Fetoprotein                                                      | Protein Coding | 46 | GC04P073431 | 0.21 |

|      |          |                                                                                    |                |    |             |      |
|------|----------|------------------------------------------------------------------------------------|----------------|----|-------------|------|
| 999  | HMGCR    | 3-Hydroxy-3-Methylglutaryl-CoA Reductase                                           | Protein Coding | 45 | GC05P075336 | 0.21 |
| 1000 | CNR2     | Cannabinoid Receptor 2                                                             | Protein Coding | 45 | GC01M023870 | 0.21 |
| 1001 | CXCL12   | C-X-C Motif Chemokine Ligand 12                                                    | Protein Coding | 45 | GC10M044370 | 0.21 |
| 1002 | SUOX     | Sulfite Oxidase                                                                    | Protein Coding | 45 | GC12P055997 | 0.21 |
| 1003 | PTPRB    | Protein Tyrosine Phosphatase Receptor Type B                                       | Protein Coding | 45 | GC12M070516 | 0.21 |
| 1004 | SLC18A1  | Solute Carrier Family 18 Member A1                                                 | Protein Coding | 45 | GC08M020144 | 0.21 |
| 1005 | CIITA    | Class II Major Histocompatibility Complex Transactivator                           | Protein Coding | 45 | GC16P010879 | 0.21 |
| 1006 | PEPD     | Peptidase D                                                                        | Protein Coding | 45 | GC19M033386 | 0.21 |
| 1007 | HSP90AB1 | Heat Shock Protein 90 Alpha Family Class B Member 1                                | Protein Coding | 45 | GC06P044246 | 0.21 |
| 1008 | F2RL3    | F2R Like Thrombin Or Trypsin Receptor 3                                            | Protein Coding | 45 | GC19P016888 | 0.21 |
| 1009 | DVL2     | Dishevelled Segment Polarity Protein 2                                             | Protein Coding | 45 | GC17M007225 | 0.21 |
| 1010 | MTHFD1   | Methylenetetrahydrofolate Dehydrogenase, Cyclohydrolase And Formyltetrahydrofolate | Protein Coding | 45 | GC14P064388 | 0.21 |
| 1011 | DDIT3    | DNA Damage Inducible Transcript 3                                                  | Protein Coding | 45 | GC12M057516 | 0.21 |
| 1012 | BCL6     | BCL6 Transcription Repressor                                                       | Protein Coding | 45 | GC03M187721 | 0.21 |
| 1013 | FHIT     | Fragile Histidine Triad Diadenosine Triphosphatase                                 | Protein Coding | 45 | GC03M059747 | 0.21 |
| 1014 | HMGGB1   | High Mobility Group Box 1                                                          | Protein Coding | 44 | GC13M030456 | 0.21 |
| 1015 | SLC17A5  | Solute Carrier Family 17 Member 5                                                  | Protein Coding | 44 | GC06M073593 | 0.21 |
| 1016 | SDC4     | Syndecan 4                                                                         | Protein Coding | 44 | GC20M045325 | 0.21 |
| 1017 | SI       | Sucrase-Isomaltase                                                                 | Protein Coding | 44 | GC03M164978 | 0.21 |
| 1018 | SP1      | Sp1 Transcription Factor                                                           | Protein Coding | 44 | GC12P053380 | 0.21 |
| 1019 | HSPA6    | Heat Shock Protein Family A (Hsp70) Member 6                                       | Protein Coding | 44 | GC01P161524 | 0.21 |
| 1020 | IGFBP2   | Insulin Like Growth Factor Binding Protein 2                                       | Protein Coding | 44 | GC02P216632 | 0.21 |
| 1021 | FGF4     | Fibroblast Growth Factor 4                                                         | Protein Coding | 44 | GC11M069762 | 0.21 |
| 1022 | AGER     | Advanced Glycosylation End-Product Specific Receptor                               | Protein Coding | 44 | GC06M032180 | 0.21 |
| 1023 | CPOX     | Coproporphyrinogen Oxidase                                                         | Protein Coding | 43 | GC03M098576 | 0.21 |
| 1024 | CEBPB    | CCAAT Enhancer Binding Protein Beta                                                | Protein Coding | 43 | GC20P050190 | 0.21 |
| 1025 | PTPRN    | Protein Tyrosine Phosphatase Receptor Type N                                       | Protein Coding | 43 | GC02M219289 | 0.21 |
| 1026 | TRIB3    | Tribbles Pseudokinase 3                                                            | Protein Coding | 43 | GC20P000361 | 0.21 |
| 1027 | TLR6     | Toll Like Receptor 6                                                               | Protein Coding | 43 | GC04M038828 | 0.21 |
| 1028 | TNXB     | Tenascin XB                                                                        | Protein Coding | 43 | GC06M032383 | 0.21 |
| 1029 | UBC      | Ubiquitin C                                                                        | Protein Coding | 43 | GC12M124911 | 0.21 |
| 1030 | TREH     | Trehalase                                                                          | Protein Coding | 43 | GC11M118657 | 0.21 |
| 1031 | LIPG     | Lipase G, Endothelial Type                                                         | Protein Coding | 43 | GC18P049560 | 0.21 |
| 1032 | SELENBP1 | Selenium Binding Protein 1                                                         | Protein Coding | 43 | GC01M151364 | 0.21 |
| 1033 | OSM      | Oncostatin M                                                                       | Protein Coding | 43 | GC22M030262 | 0.21 |
| 1034 | SDC1     | Syndecan 1                                                                         | Protein Coding | 43 | GC02M020200 | 0.21 |
| 1035 | CDA      | Cytidine Deaminase                                                                 | Protein Coding | 43 | GC01P020588 | 0.21 |
| 1036 | HSPA1A   | Heat Shock Protein Family A (Hsp70) Member 1A                                      | Protein Coding | 43 | GC06P033429 | 0.21 |
| 1037 | IGFBP1   | Insulin Like Growth Factor Binding Protein 1                                       | Protein Coding | 43 | GC07P046473 | 0.21 |
| 1038 | CD226    | CD226 Molecule                                                                     | Protein Coding | 43 | GC18M069831 | 0.21 |
| 1039 | NDUFA13  | NADH:Ubiquinone Oxidoreductase Subunit A13                                         | Protein Coding | 43 | GC19P019515 | 0.21 |
| 1040 | FCER1A   | Fc Fragment Of IgE Receptor Ia                                                     | Protein Coding | 43 | GC01P159259 | 0.21 |
| 1041 | ATG16L1  | Autophagy Related 16 Like 1                                                        | Protein Coding | 43 | GC02P233215 | 0.21 |
| 1042 | ADH1B    | Alcohol Dehydrogenase 1B (Class I), Beta Polypeptide                               | Protein Coding | 43 | GC04M099304 | 0.21 |
| 1043 | CNTF     | Ciliary Neurotrophic Factor                                                        | Protein Coding | 42 | GC11P058622 | 0.21 |
| 1044 | ITGA1    | Integrin Subunit Alpha 1                                                           | Protein Coding | 42 | GC05P052788 | 0.21 |
| 1045 | PRPF31   | Pre-mRNA Processing Factor 31                                                      | Protein Coding | 42 | GC19P054165 | 0.21 |
| 1046 | PTPRT    | Protein Tyrosine Phosphatase Receptor Type T                                       | Protein Coding | 42 | GC20M042072 | 0.21 |
| 1047 | TNFRSF6B | TNF Receptor Superfamily Member 6b                                                 | Protein Coding | 42 | GC20P063696 | 0.21 |
| 1048 | NR2C2    | Nuclear Receptor Subfamily 2 Group C Member 2                                      | Protein Coding | 42 | GC03P014947 | 0.21 |
| 1049 | CLCF1    | Cardiotrophin Like Cytokine Factor 1                                               | Protein Coding | 42 | GC11M067364 | 0.21 |
| 1050 | EPO      | Erythropoietin                                                                     | Protein Coding | 42 | GC07P100720 | 0.21 |
| 1051 | GDF15    | Growth Differentiation Factor 15                                                   | Protein Coding | 42 | GC19P022252 | 0.21 |
| 1052 | EEF1B2   | Eukaryotic Translation Elongation Factor 1 Beta 2                                  | Protein Coding | 42 | GC02P206159 | 0.21 |
| 1053 | DNTT     | DNA Nucleotidyltransferase                                                         | Protein Coding | 42 | GC10P096304 | 0.21 |
| 1054 | MTRR     | 5-Methyltetrahydrofolate-Homocysteine Methyltransferase Reductase                  | Protein Coding | 42 | GC05P007851 | 0.21 |
| 1055 | APBA2    | Amyloid Beta Precursor Protein Binding Family A Member 2                           | Protein Coding | 42 | GC15P028888 | 0.21 |
| 1056 | ADAM8    | ADAM Metallopeptidase Domain 8                                                     | Protein Coding | 42 | GC10M133262 | 0.21 |
| 1057 | ACTC1    | Actin Alpha Cardiac Muscle 1                                                       | Protein Coding | 42 | GC15M034788 | 0.21 |
| 1058 | BACH2    | BTB Domain And CNC Homolog 2                                                       | Protein Coding | 42 | GC06M089926 | 0.21 |
| 1059 | CTHRC1   | Collagen Triple Helix Repeat Containing 1                                          | Protein Coding | 41 | GC08P103371 | 0.21 |
| 1060 | CLIC1    | Chloride Intracellular Channel 1                                                   | Protein Coding | 41 | GC06M032375 | 0.21 |
| 1061 | HIC1     | HIC ZBTB Transcriptional Repressor 1                                               | Protein Coding | 41 | GC17P002054 | 0.21 |
| 1062 | COPA     | COPI Coat Complex Subunit Alpha                                                    | Protein Coding | 41 | GC01M160288 | 0.21 |
| 1063 | PRDM2    | PR/SET Domain 2                                                                    | Protein Coding | 41 | GC01P013700 | 0.21 |
| 1064 | KIF2A    | Kinesin Family Member 2A                                                           | Protein Coding | 41 | GC05P062306 | 0.21 |
| 1065 | RECK     | Reversion Inducing Cysteine Rich Protein With Kazal Motifs                         | Protein Coding | 41 | GC09P036036 | 0.21 |
| 1066 | UGT1A6   | UDP Glucuronosyltransferase Family 1 Member A6                                     | Protein Coding | 41 | GC02P233691 | 0.21 |
| 1067 | TEP1     | Telomerase Associated Protein 1                                                    | Protein Coding | 41 | GC14M020365 | 0.21 |
| 1068 | TERF2    | Telomeric Repeat Binding Factor 2                                                  | Protein Coding | 41 | GC16M069355 | 0.21 |
| 1069 | SCTR     | Secretin Receptor                                                                  | Protein Coding | 41 | GC02M119439 | 0.21 |
| 1070 | F2RL2    | Coagulation Factor II Thrombin Receptor Like 2                                     | Protein Coding | 41 | GC05M076615 | 0.21 |
| 1071 | CCR9     | C-C Motif Chemokine Receptor 9                                                     | Protein Coding | 41 | GC03P045903 | 0.21 |
| 1072 | CALB2    | Calbindin 2                                                                        | Protein Coding | 41 | GC16P071392 | 0.21 |
| 1073 | MX1      | MX Dynamin Like GTPase 1                                                           | Protein Coding | 41 | GC21P041420 | 0.21 |
| 1074 | GPR55    | G Protein-Coupled Receptor 55                                                      | Protein Coding | 40 | GC02M230907 | 0.21 |
| 1075 | PIWIL1   | Piwi Like RNA-Mediated Gene Silencing 1                                            | Protein Coding | 40 | GC12P130337 | 0.21 |

|      |           |                                                                        |                |    |             |      |
|------|-----------|------------------------------------------------------------------------|----------------|----|-------------|------|
| 1076 | IL32      | Interleukin 32                                                         | Protein Coding | 40 | GC16P004058 | 0.21 |
| 1077 | ZNF148    | Zinc Finger Protein 148                                                | Protein Coding | 40 | GC03M125225 | 0.21 |
| 1078 | FUCA2     | Alpha-L-Fucosidase 2                                                   | Protein Coding | 40 | GC06M143494 | 0.21 |
| 1079 | ATP4B     | ATPase H+/K+ Transporting Subunit Beta                                 | Protein Coding | 40 | GC13M113648 | 0.21 |
| 1080 | CTF1      | Cardiotrophin 1                                                        | Protein Coding | 39 | GC16P030910 | 0.21 |
| 1081 | IL27      | Interleukin 27                                                         | Protein Coding | 39 | GC16M028511 | 0.21 |
| 1082 | KLF3      | Kruppel Like Factor 3                                                  | Protein Coding | 39 | GC04P038668 | 0.21 |
| 1083 | TRAK1     | Trafficking Kinesin Protein 1                                          | Protein Coding | 39 | GC03P042016 | 0.21 |
| 1084 | ZNRD1     | Zinc Ribbon Domain Containing 1                                        | Protein Coding | 39 | GC06P033214 | 0.21 |
| 1085 | ORMDL3    | ORMDL Sphingolipid Biosynthesis Regulator 3                            | Protein Coding | 39 | GC17M039921 | 0.21 |
| 1086 | SLC26A6   | Solute Carrier Family 26 Member 6                                      | Protein Coding | 39 | GC03M048625 | 0.21 |
| 1087 | IFNA1     | Interferon Alpha 1                                                     | Protein Coding | 39 | GC09P021478 | 0.21 |
| 1088 | NAPA      | NSF Attachment Protein Alpha                                           | Protein Coding | 39 | GC19M047489 | 0.21 |
| 1089 | NOVA1     | NOVA Alternative Splicing Regulator 1                                  | Protein Coding | 39 | GC14M026443 | 0.21 |
| 1090 | ETV5      | ETS Variant Transcription Factor 5                                     | Protein Coding | 39 | GC03M186046 | 0.21 |
| 1091 | ANKRD26   | Ankyrin Repeat Domain 26                                               | Protein Coding | 39 | GC10M026961 | 0.21 |
| 1092 | GLG1      | Golgi Glycoprotein 1                                                   | Protein Coding | 38 | GC16M074448 | 0.21 |
| 1093 | UBASH3A   | Ubiquitin Associated And SH3 Domain Containing A                       | Protein Coding | 38 | GC21P042403 | 0.21 |
| 1094 | IL18RAP   | Interleukin 18 Receptor Accessory Protein                              | Protein Coding | 38 | GC02P102418 | 0.21 |
| 1095 | OLFM4     | Olfactomedin 4                                                         | Protein Coding | 38 | GC13P053028 | 0.21 |
| 1096 | BLZF1     | Basic Leucine Zipper Nuclear Factor 1                                  | Protein Coding | 38 | GC01P169367 | 0.21 |
| 1097 | ASMT      | Acetylserotonin O-Methyltransferase                                    | Protein Coding | 38 | GC0XP001595 | 0.21 |
| 1098 | AANAT     | Aralkylamine N-Acetyltransferase                                       | Protein Coding | 38 | GC17P076453 | 0.21 |
| 1099 | IL1RAPL2  | Interleukin 1 Receptor Accessory Protein Like 2                        | Protein Coding | 37 | GC0XP104566 | 0.21 |
| 1100 | UCN3      | Urocortin 3                                                            | Protein Coding | 37 | GC10P005396 | 0.21 |
| 1101 | DNAH8     | Dynein Axonemal Heavy Chain 8                                          | Protein Coding | 37 | GC06P046078 | 0.21 |
| 1102 | ATOH1     | Atonal BHLH Transcription Factor 1                                     | Protein Coding | 37 | GC04P093828 | 0.21 |
| 1103 | LACTB     | Lactamase Beta                                                         | Protein Coding | 36 | GC15P071910 | 0.21 |
| 1104 | KLHL6     | Kelch Like Family Member 6                                             | Protein Coding | 36 | GC03M183487 | 0.21 |
| 1105 | IKZF4     | IKAROS Family Zinc Finger 4                                            | Protein Coding | 36 | GC12P056007 | 0.21 |
| 1106 | CLEC16A   | C-Type Lectin Domain Containing 16A                                    | Protein Coding | 36 | GC16P010944 | 0.21 |
| 1107 | POMGNT2   | Protein O-Linked Mannose N-Acetylglucosaminyltransferase 2 (Beta 1,4-) | Protein Coding | 36 | GC03M043121 | 0.21 |
| 1108 | G3BP2     | G3BP Stress Granule Assembly Factor 2                                  | Protein Coding | 36 | GC04M075642 | 0.21 |
| 1109 | MAGEA4    | MAGE Family Member A4                                                  | Protein Coding | 36 | GC0XP151912 | 0.21 |
| 1110 | MUC16     | Mucin 16, Cell Surface Associated                                      | Protein Coding | 36 | GC19M008848 | 0.21 |
| 1111 | RILP      | Rab Interacting Lysosomal Protein                                      | Protein Coding | 36 | GC17M001646 | 0.21 |
| 1112 | FCRL3     | Fc Receptor Like 3                                                     | Protein Coding | 36 | GC01M157674 | 0.21 |
| 1113 | IRX2      | Iroquois Homeobox 2                                                    | Protein Coding | 35 | GC05M002745 | 0.21 |
| 1114 | TADA3     | Transcriptional Adaptor 3                                              | Protein Coding | 35 | GC03M009779 | 0.21 |
| 1115 | ZBPB2     | Zona Pellucida Binding Protein 2                                       | Protein Coding | 35 | GC17P039869 | 0.21 |
| 1116 | FOXO1     | Forkhead Box D1                                                        | Protein Coding | 35 | GC05M073444 | 0.21 |
| 1117 | PSMG2     | Proteasome Assembly Chaperone 2                                        | Protein Coding | 34 | GC18P013073 | 0.21 |
| 1118 | RABEP2    | Rabaptin, RAB GTPase Binding Effector Protein 2                        | Protein Coding | 34 | GC16M028915 | 0.21 |
| 1119 | ADAD1     | Adenosine Deaminase Domain Containing 1                                | Protein Coding | 34 | GC04P122378 | 0.21 |
| 1120 | FAM114A1  | Family With Sequence Similarity 114 Member A1                          | Protein Coding | 34 | GC04P038867 | 0.21 |
| 1121 | CSN1S1    | Casein Alpha S1                                                        | Protein Coding | 33 | GC04P069932 | 0.21 |
| 1122 | UCN2      | Urocortin 2                                                            | Protein Coding | 33 | GC03M048561 | 0.21 |
| 1123 | DDX53     | DEAD-Box Helicase 53                                                   | Protein Coding | 33 | GC0XP022999 | 0.21 |
| 1124 | IGKC      | Immunoglobulin Kappa Constant                                          | Protein Coding | 32 | GC02M089081 | 0.21 |
| 1125 | SLFN12L   | Schlafen Family Member 12 Like                                         | Protein Coding | 32 | GC17M035464 | 0.21 |
| 1126 | SELENOS   | Selenoprotein S                                                        | Protein Coding | 31 | GC15M102816 | 0.21 |
| 1127 | CTAG1B    | Cancer/Testis Antigen 1B                                               | Protein Coding | 30 | GC0XM154617 | 0.21 |
| 1128 | RASSF10   | Ras Association Domain Family Member 10                                | Protein Coding | 30 | GC11P012990 | 0.21 |
| 1129 | INS-IGF2  | INS-IGF2 Readthrough                                                   | Protein Coding | 27 | GC11M002177 | 0.21 |
| 1130 | IGF2-AS   | IGF2 Antisense RNA                                                     | RNA Gene       | 24 | GC11P002140 | 0.21 |
| 1131 | MIR1915   | MicroRNA 1915                                                          | RNA Gene       | 15 | GC10M021496 | 0.21 |
| 1132 | MIR490    | MicroRNA 490                                                           | RNA Gene       | 14 | GC07P136903 | 0.21 |
| 1133 | MIR3178   | MicroRNA 3178                                                          | RNA Gene       | 13 | GC16M002531 | 0.21 |
| 1134 | MIR329-1  | MicroRNA 329-1                                                         | RNA Gene       | 12 | GC14P104444 | 0.21 |
| 1135 | MIR329-2  | MicroRNA 329-2                                                         | RNA Gene       | 12 | GC14P104445 | 0.21 |
| 1136 | LINC02864 | Long Intergenic Non-Protein Coding RNA 2864                            | RNA Gene       | 9  | GC18M073103 | 0.21 |
| 1137 | TMEM132D- | TMEM132D Antisense RNA 1                                               | RNA Gene       | 8  | GC12P129110 | 0.21 |
| 1138 | RPS14P1   | Ribosomal Protein S14 Pseudogene 1                                     | Pseudogene     | 5  | GC01M206695 | 0.21 |
