# Supplementary material for: Pharmacological Effects of Agastache rugosa against Gastritis Using a Network Pharmacology Approach
Source: MDPI journal article supplement (doi:10.3390/biom10091298), 2020-09-09
Supplement: s1 [file s1]

**Supplementary table 2. All genes related chemical components based on STITCH DB**

| Chemical        | gene    | combined score |
|-----------------|---------|----------------|
| Diosmetin       | ABCC1   | 0.763          |
| Luteolin        | ABCC1   | 0.714          |
| Luteolin        | ADAMTS3 | 0.8            |
| Luteolin        | ADAMTS4 | 0.8            |
| Luteolin        | AGT     | 0.786          |
| Luteolin        | AKT1    | 0.856          |
| Luteolin        | AURKB   | 0.8            |
| Luteolin        | BCL2L1  | 0.841          |
| Calycosin       | BLVRB   | 0.845          |
| Luteolin        | C3      | 0.786          |
| Luteolin        | CASP3   | 0.947          |
| Luteolin        | CASP7   | 0.7            |
| Luteolin        | CASP9   | 0.7            |
| Luteolin        | CCNA2   | 0.856          |
| Rosmarinic acid | CCR3    | 0.8            |
| Luteolin        | CDH1    | 0.8            |
| Luteolin        | CDK2    | 0.942          |
| Luteolin        | CDK4    | 0.8            |
| Luteolin        | CSNK2A1 | 0.701          |
| Luteolin        | CSNK2A2 | 0.701          |
| Luteolin        | CYP19A1 | 0.8            |
| Diosmetin       | CYP1A1  | 0.88           |
| Acacetin        | CYP1A1  | 0.869          |
| Luteolin        | CYP1A1  | 0.777          |
| Acacetin        | CYP1A2  | 0.869          |
| Acacetin        | CYP1B1  | 0.905          |
| Diosmetin       | CYP1B1  | 0.887          |
| Luteolin        | CYP1B1  | 0.847          |
| Diosmetin       | CYP2C8  | 0.8            |
| Luteolin        | E2F5    | 0.8            |
| Luteolin        | EGFR    | 0.869          |
| Luteolin        | ERBB2   | 0.786          |
| Luteolin        | ESR2    | 0.7            |
| Luteolin        | EZH2    | 0.818          |
| Luteolin        | FN1     | 0.8            |
| Luteolin        | FOS     | 0.944          |
| Rosmarinic acid | FOS     | 0.8            |
| Luteolin        | FOSB    | 0.7            |
| Luteolin        | FOXO1   | 0.817          |
| Calycosin       | HMGB1   | 0.824          |

|                 |          |       |
|-----------------|----------|-------|
| Luteolin        | HMOX1    | 0.822 |
| Luteolin        | HSP90AA1 | 0.8   |
| Luteolin        | IGF1     | 0.8   |
| Luteolin        | IGF2     | 0.8   |
| Rosmarinic acid | IKBKB    | 0.8   |
| Acacetin        | IL13     | 0.8   |
| Luteolin        | IL1B     | 0.8   |
| Rosmarinic acid | IL2      | 0.8   |
| Acacetin        | IL5      | 0.8   |
| Luteolin        | IRS1     | 0.8   |
| Luteolin        | JUN      | 0.946 |
| Acacetin        | JUN      | 0.8   |
| Luteolin        | JUNB     | 0.7   |
| Luteolin        | JUND     | 0.7   |
| Rosmarinic acid | LCK      | 0.8   |
| Luteolin        | LCN2     | 0.8   |
| Luteolin        | MAP3K8   | 0.8   |
| Calycosin       | MAPK1    | 0.7   |
| Luteolin        | MAPK1    | 0.7   |
| Luteolin        | MAPK10   | 0.7   |
| Calycosin       | MAPK3    | 0.7   |
| Luteolin        | MAPK3    | 0.7   |
| Luteolin        | MAPK8    | 0.951 |
| Luteolin        | MAPK9    | 0.731 |
| Luteolin        | MMP9     | 0.949 |
| Luteolin        | MTOR     | 0.823 |
| Luteolin        | NFE2L2   | 0.816 |
| Luteolin        | NOS1     | 0.786 |
| Luteolin        | NOS2     | 0.784 |
| Acacetin        | NR1I2    | 0.7   |
| Rosmarinic acid | PARG     | 0.7   |
| Luteolin        | PCK1     | 0.786 |
| Luteolin        | PKM      | 0.726 |
| Diosmetin       | PKM      | 0.7   |
| Luteolin        | PPARG    | 0.818 |
| Rosmarinic acid | PROCR    | 0.7   |
| Luteolin        | PTK2     | 0.7   |
| Luteolin        | RPS6KA1  | 0.8   |
| Luteolin        | RPS6KA2  | 0.786 |
| Luteolin        | RPS6KA3  | 0.8   |
| Acacetin        | SELE     | 0.8   |
| Luteolin        | SMAD2    | 0.859 |
| Acacetin        | STAT1    | 0.82  |

|           |           |       |
|-----------|-----------|-------|
| Luteolin  | STAT3     | 0.748 |
| Luteolin  | TAF9      | 0.8   |
| Luteolin  | TBK1      | 0.7   |
| Luteolin  | TLR4      | 0.817 |
| Luteolin  | TLR5      | 0.8   |
| Luteolin  | TNFRSF10B | 0.8   |
| Luteolin  | TNKS2     | 0.8   |
| Luteolin  | TOP1      | 0.846 |
| Luteolin  | TP53      | 0.828 |
| Luteolin  | TTR       | 0.8   |
| Calycosin | UGT1A1    | 0.7   |
| Calycosin | UGT1A10   | 0.7   |
| Luteolin  | UGT1A3    | 0.729 |
| Calycosin | UGT1A3    | 0.7   |
| Calycosin | UGT1A7    | 0.7   |
| Calycosin | UGT1A8    | 0.7   |
| Calycosin | UGT1A9    | 0.7   |
| Calycosin | UGT2B7    | 0.7   |
| Luteolin  | USP8      | 0.8   |
| Luteolin  | VEGFA     | 0.855 |
| Acacetin  | VEGFA     | 0.8   |
| Luteolin  | VRK1      | 0.8   |
| Luteolin  | TNF       | 0.698 |
| Luteolin  | PCK2      | 0.665 |
| Luteolin  | BCAM      | 0.664 |
| Luteolin  | PDZD4     | 0.642 |
| Luteolin  | NOS3      | 0.613 |
| Luteolin  | ERBB3     | 0.579 |
| Luteolin  | ERBB4     | 0.579 |
| Luteolin  | CNTN6     | 0.574 |
| Luteolin  | C4A       | 0.566 |
| Luteolin  | C4B       | 0.566 |
| Luteolin  | AKR1B1    | 0.535 |
| Luteolin  | C5        | 0.515 |
| Luteolin  | MTRR      | 0.473 |
| Luteolin  | POR       | 0.473 |
| Luteolin  | XDH       | 0.463 |
| Luteolin  | LAMA5     | 0.44  |
| Luteolin  | MCAM      | 0.431 |
| Luteolin  | A2M       | 0.423 |
| Luteolin  | A2ML1     | 0.423 |
| Luteolin  | COQ6      | 0.386 |
| Luteolin  | KMO       | 0.386 |

|                 |           |       |
|-----------------|-----------|-------|
| Luteolin        | SQLE      | 0.386 |
| Luteolin        | FUT2      | 0.374 |
| Rosmarinic acid | AKR1B1    | 0.369 |
| Luteolin        | LTA       | 0.366 |
| Luteolin        | DCP2      | 0.363 |
| Luteolin        | NOX4      | 0.363 |
| Luteolin        | NUDT1     | 0.363 |
| Luteolin        | NUDT10    | 0.363 |
| Luteolin        | NUDT11    | 0.363 |
| Luteolin        | NUDT14    | 0.363 |
| Luteolin        | NUDT2     | 0.363 |
| Luteolin        | NUDT5     | 0.363 |
| Luteolin        | NUDT7     | 0.363 |
| Luteolin        | NUDT8     | 0.363 |
| Luteolin        | NDOR1     | 0.344 |
| Luteolin        | TYW1      | 0.344 |
| Acacetin        | RGS17     | 0.336 |
| Luteolin        | MAP2K4    | 0.332 |
| Luteolin        | UCN2      | 0.332 |
| Luteolin        | CCNE2     | 0.331 |
| Luteolin        | HMSD      | 0.32  |
| Luteolin        | PTS       | 0.32  |
| Luteolin        | SERPINA1  | 0.32  |
| Luteolin        | SERPINA10 | 0.32  |
| Luteolin        | SERPINA11 | 0.32  |
| Luteolin        | SERPINA12 | 0.32  |
| Luteolin        | SERPINA3  | 0.32  |
| Luteolin        | SERPINA4  | 0.32  |
| Luteolin        | SERPINA5  | 0.32  |
| Luteolin        | SERPINA6  | 0.32  |
| Luteolin        | SERPINA7  | 0.32  |
| Luteolin        | SERPINA9  | 0.32  |
| Luteolin        | SERPINB1  | 0.32  |
| Luteolin        | SERPINB10 | 0.32  |
| Luteolin        | SERPINB12 | 0.32  |
| Luteolin        | SERPINB13 | 0.32  |
| Luteolin        | SERPINB2  | 0.32  |
| Luteolin        | SERPINB3  | 0.32  |
| Luteolin        | SERPINB4  | 0.32  |
| Luteolin        | SERPINB5  | 0.32  |
| Luteolin        | SERPINB6  | 0.32  |
| Luteolin        | SERPINB7  | 0.32  |
| Luteolin        | SERPINB8  | 0.32  |

|           |          |       |
|-----------|----------|-------|
| Luteolin  | SERPINB9 | 0.32  |
| Luteolin  | SERPINC1 | 0.32  |
| Luteolin  | SERPIND1 | 0.32  |
| Luteolin  | SERPINE1 | 0.32  |
| Luteolin  | SERPINE2 | 0.32  |
| Luteolin  | SERPINE3 | 0.32  |
| Luteolin  | SERPINF1 | 0.32  |
| Luteolin  | SERPINF2 | 0.32  |
| Luteolin  | SERPING1 | 0.32  |
| Luteolin  | SERPINH1 | 0.32  |
| Luteolin  | SERPINI1 | 0.32  |
| Luteolin  | SERPINI2 | 0.32  |
| Luteolin  | SMAD1    | 0.316 |
| Luteolin  | SMAD3    | 0.316 |
| Luteolin  | SMAD5    | 0.316 |
| Luteolin  | SMAD9    | 0.316 |
| Luteolin  | FLT3     | 0.312 |
| Luteolin  | CAT      | 0.307 |
| Luteolin  | CRHR2    | 0.305 |
| Luteolin  | MPI      | 0.298 |
| Luteolin  | CDC25A   | 0.289 |
| Acacetin  | RGS20    | 0.288 |
| Acacetin  | RPLP1    | 0.288 |
| Luteolin  | AASDHPPT | 0.282 |
| Luteolin  | AKR1B10  | 0.281 |
| Luteolin  | AKR1E2   | 0.281 |
| Calycosin | PNPO     | 0.281 |
| Luteolin  | PLK1     | 0.277 |
| Calycosin | ABHD14B  | 0.272 |
| Diosmetin | DET1     | 0.267 |
| Luteolin  | HDC      | 0.267 |
| Luteolin  | AKR1A1   | 0.266 |
| Acacetin  | KCNK10   | 0.266 |
| Acacetin  | RGS19    | 0.266 |
| Tilianin  | C1orf116 | 0.263 |
| Luteolin  | CDKN1B   | 0.262 |
| Acacetin  | WIZ      | 0.257 |
| Luteolin  | TOP1MT   | 0.252 |
| Luteolin  | EZR      | 0.248 |
| Luteolin  | MSN      | 0.248 |
| Luteolin  | NF2      | 0.248 |
| Luteolin  | RDX      | 0.248 |
| Diosmetin | ADA      | 0.246 |

|                 |         |       |
|-----------------|---------|-------|
| Diosmetin       | ADAL    | 0.246 |
| Diosmetin       | AMPD1   | 0.246 |
| Diosmetin       | AMPD2   | 0.246 |
| Diosmetin       | AMPD3   | 0.246 |
| Diosmetin       | CECR1   | 0.246 |
| Calycosin       | NKIRAS2 | 0.244 |
| Luteolin        | PRODH   | 0.242 |
| Luteolin        | PRODH2  | 0.242 |
| Luteolin        | HSPE1   | 0.239 |
| Luteolin        | IL6     | 0.239 |
| Luteolin        | KEL     | 0.239 |
| Luteolin        | CCNB1   | 0.237 |
| Luteolin        | AKR1C1  | 0.236 |
| Luteolin        | AKR1C2  | 0.236 |
| Luteolin        | AKR1C3  | 0.236 |
| Luteolin        | AKR1C4  | 0.236 |
| Luteolin        | AKR1D1  | 0.236 |
| Luteolin        | ABCG2   | 0.235 |
| Luteolin        | KARS    | 0.235 |
| Luteolin        | MAOA    | 0.235 |
| Rosmarinic acid | PPEF1   | 0.235 |
| Rosmarinic acid | PPEF2   | 0.235 |
| Rosmarinic acid | PPP2CA  | 0.235 |
| Rosmarinic acid | PPP2CB  | 0.235 |
| Rosmarinic acid | PPP3CA  | 0.235 |
| Rosmarinic acid | PPP3CB  | 0.235 |
| Rosmarinic acid | PPP3CC  | 0.235 |
| Rosmarinic acid | PPP4C   | 0.235 |
| Rosmarinic acid | PPP5C   | 0.235 |
| Rosmarinic acid | PPP5D1  | 0.235 |
| Luteolin        | EPOR    | 0.232 |
| Luteolin        | SLC23A1 | 0.232 |
| Luteolin        | SLC23A2 | 0.232 |
| Luteolin        | SLC23A3 | 0.232 |
| Luteolin        | SLC4A1  | 0.231 |
| Luteolin        | SLC4A10 | 0.231 |
| Luteolin        | SLC4A2  | 0.231 |
| Luteolin        | SLC4A3  | 0.231 |
| Luteolin        | SLC4A4  | 0.231 |
| Luteolin        | SLC4A5  | 0.231 |
| Luteolin        | SLC4A7  | 0.231 |
| Luteolin        | SLC4A8  | 0.231 |
| Luteolin        | AKR1B15 | 0.228 |

|                 |         |       |
|-----------------|---------|-------|
| Acacetin        | CCNB1   | 0.227 |
| Acacetin        | CCNB2   | 0.227 |
| Acacetin        | CCNB3   | 0.227 |
| Acacetin        | CCNG1   | 0.227 |
| Acacetin        | CCNG2   | 0.227 |
| Acacetin        | CCNI    | 0.227 |
| Acacetin        | CCNI2   | 0.227 |
| Acacetin        | CCNO    | 0.227 |
| Acacetin        | CNTD2   | 0.227 |
| Rosmarinic acid | AMFR    | 0.226 |
| Rosmarinic acid | BCHE    | 0.226 |
| Acacetin        | KCNK2   | 0.226 |
| Calycosin       | RASL11A | 0.226 |
| Luteolin        | AKR1CL1 | 0.225 |
| Luteolin        | CBR4    | 0.224 |
| Luteolin        | HSD17B8 | 0.224 |
| Calycosin       | TAGLN2  | 0.222 |
| Calycosin       | NBL1    | 0.219 |
| Calycosin       | RASL11B | 0.218 |
| Luteolin        | PPCDC   | 0.215 |
| Luteolin        | PPCS    | 0.215 |
| Luteolin        | ABCA1   | 0.214 |
| Luteolin        | ABCA10  | 0.214 |
| Luteolin        | ABCA12  | 0.214 |
| Luteolin        | ABCA13  | 0.214 |
| Luteolin        | ABCA2   | 0.214 |
| Luteolin        | ABCA3   | 0.214 |
| Luteolin        | ABCA4   | 0.214 |
| Luteolin        | ABCA5   | 0.214 |
| Luteolin        | ABCA6   | 0.214 |
| Luteolin        | ABCA7   | 0.214 |
| Luteolin        | ABCA8   | 0.214 |
| Luteolin        | ABCA9   | 0.214 |
| Luteolin        | ABCG1   | 0.214 |
| Luteolin        | ABCG4   | 0.214 |
| Luteolin        | ABCG5   | 0.214 |
| Luteolin        | ABCG8   | 0.214 |
| Diosmetin       | CDKN2C  | 0.214 |
| Luteolin        | ECM1    | 0.214 |
| Luteolin        | DAB2IP  | 0.213 |
| Luteolin        | NCOA1   | 0.213 |
| Tilianin        | PGS1    | 0.213 |
| Luteolin        | CDKN2C  | 0.212 |

|                 |           |       |
|-----------------|-----------|-------|
| Rosmarinic acid | FYN       | 0.212 |
| Luteolin        | C1orf106  | 0.211 |
| Luteolin        | CCDC120   | 0.211 |
| Luteolin        | FRMD4A    | 0.211 |
| Luteolin        | FRMD4B    | 0.211 |
| Luteolin        | H3F3B     | 0.211 |
| Luteolin        | PARP1     | 0.21  |
| Luteolin        | IL8       | 0.208 |
| Calycosin       | DIRAS1    | 0.206 |
| Rosmarinic acid | HTRA1     | 0.206 |
| Rosmarinic acid | HTRA3     | 0.206 |
| Rosmarinic acid | HTRA4     | 0.206 |
| Luteolin        | GCLM      | 0.205 |
| Luteolin        | HSPD1     | 0.203 |
| Diosmetin       | HSF5      | 0.202 |
| Luteolin        | MST1R     | 0.202 |
| Acacetin        | RGS4      | 0.202 |
| Luteolin        | SLC4A11   | 0.2   |
| Luteolin        | SLC4A9    | 0.2   |
| Luteolin        | VIM       | 0.2   |
| Acacetin        | DDI1      | 0.197 |
| Acacetin        | DDI2      | 0.197 |
| Calycosin       | NKIRAS1   | 0.197 |
| Acacetin        | NRIP2     | 0.197 |
| Acacetin        | NRIP3     | 0.197 |
| Luteolin        | PUS7      | 0.197 |
| Luteolin        | PUS7L     | 0.197 |
| Luteolin        | SLC6A3    | 0.197 |
| Acacetin        | RGS2      | 0.195 |
| Acacetin        | RPLP2     | 0.194 |
| Rosmarinic acid | TMPRSS11C | 0.194 |
| Luteolin        | GPX1      | 0.193 |
| Luteolin        | GSK3B     | 0.193 |
| Calycosin       | DIRAS2    | 0.192 |
| Luteolin        | GPX2      | 0.192 |
| Acacetin        | KCNJ9     | 0.192 |
| Acacetin        | MYB       | 0.192 |
| Acacetin        | MYBL1     | 0.192 |
| Acacetin        | MYBL2     | 0.192 |
| Acacetin        | SNAPC4    | 0.192 |
| Acacetin        | ZER1      | 0.192 |
| Acacetin        | ADORA1    | 0.191 |
| Calycosin       | ALOX15    | 0.19  |

|                 |          |       |
|-----------------|----------|-------|
| Rosmarinic acid | MMP9     | 0.19  |
| Calycosin       | RASD1    | 0.19  |
| Calycosin       | RASL12   | 0.19  |
| Luteolin        | DCAF7    | 0.189 |
| Diosmetin       | EEF2     | 0.189 |
| Luteolin        | BCHE     | 0.188 |
| Calycosin       | PIK3CG   | 0.188 |
| Luteolin        | ALOX5    | 0.187 |
| Rosmarinic acid | HTRA2    | 0.184 |
| Rosmarinic acid | PON1     | 0.183 |
| Rosmarinic acid | PON2     | 0.183 |
| Rosmarinic acid | PON3     | 0.183 |
| Luteolin        | CETN2    | 0.182 |
| Luteolin        | CETN3    | 0.182 |
| Rosmarinic acid | ENSA     | 0.182 |
| Luteolin        | SLC6A2   | 0.182 |
| Luteolin        | TIMM50   | 0.182 |
| Luteolin        | GAB1     | 0.181 |
| Diosmetin       | SIK2     | 0.181 |
| Acacetin        | MBTPS2   | 0.18  |
| Luteolin        | PCNA     | 0.179 |
| Diosmetin       | AVP      | 0.178 |
| Acacetin        | CDNF     | 0.178 |
| Luteolin        | HES1     | 0.178 |
| Luteolin        | HES4     | 0.178 |
| Rosmarinic acid | PID1     | 0.178 |
| Diosmetin       | GUCY1A3  | 0.177 |
| Acacetin        | RRAS     | 0.177 |
| Acacetin        | RRAS2    | 0.177 |
| Luteolin        | CLPP     | 0.176 |
| Rosmarinic acid | SPICE1   | 0.176 |
| Rosmarinic acid | TNFRSF14 | 0.175 |
| Rosmarinic acid | ATP5A1   | 0.174 |
| Diosmetin       | DCAF7    | 0.174 |
| Acacetin        | ISCU     | 0.174 |
| Luteolin        | PIR      | 0.173 |
| Luteolin        | TYR      | 0.173 |
| Acacetin        | CCNA1    | 0.171 |
| Acacetin        | CCNA2    | 0.171 |
| Acacetin        | CCNF     | 0.171 |
| Luteolin        | ETFB     | 0.171 |
| Rosmarinic acid | GLA      | 0.171 |
| Rosmarinic acid | NAGA     | 0.171 |

|                 |          |       |
|-----------------|----------|-------|
| Calycosin       | PLA2G4A  | 0.17  |
| Rosmarinic acid | SCO1     | 0.17  |
| Rosmarinic acid | SCO2     | 0.17  |
| Luteolin        | PTGS2    | 0.169 |
| Rosmarinic acid | SPEN     | 0.169 |
| Acacetin        | ANKRD45  | 0.168 |
| Luteolin        | PGR      | 0.168 |
| Acacetin        | SLC9C2   | 0.168 |
| Tilianin        | ENO1     | 0.167 |
| Tilianin        | ENO2     | 0.167 |
| Tilianin        | ENO3     | 0.167 |
| Luteolin        | SI       | 0.167 |
| Luteolin        | STIL     | 0.167 |
| Diosmetin       | AHRR     | 0.166 |
| Luteolin        | GSR      | 0.166 |
| Acacetin        | KCNJ5    | 0.166 |
| Tilianin        | LCT      | 0.166 |
| Luteolin        | PSMD1    | 0.166 |
| Luteolin        | TIMM50   | 0.166 |
| Luteolin        | NRIP1    | 0.163 |
| Luteolin        | NUBPL    | 0.163 |
| Acacetin        | TP53INP2 | 0.163 |
| Diosmetin       | TRAT1    | 0.163 |
| Tilianin        | ENO4     | 0.162 |
| Luteolin        | ALAD     | 0.161 |
| Luteolin        | EPS8     | 0.161 |
| Luteolin        | EPS8L2   | 0.161 |
| Diosmetin       | NTHL1    | 0.161 |
| Luteolin        | SLC6A4   | 0.161 |
| Rosmarinic acid | XRCC3    | 0.161 |
| Luteolin        | HIST1H4A | 0.16  |
| Luteolin        | HIST1H4B | 0.16  |
| Luteolin        | HIST1H4C | 0.16  |
| Luteolin        | HIST1H4D | 0.16  |
| Luteolin        | HIST1H4E | 0.16  |
| Luteolin        | HIST1H4F | 0.16  |
| Luteolin        | HIST1H4H | 0.16  |
| Luteolin        | HIST1H4I | 0.16  |
| Luteolin        | HIST1H4J | 0.16  |
| Luteolin        | HIST1H4K | 0.16  |
| Luteolin        | HIST1H4L | 0.16  |
| Luteolin        | HIST2H4A | 0.16  |
| Luteolin        | HIST2H4B | 0.16  |

|                 |           |       |
|-----------------|-----------|-------|
| Luteolin        | HIST4H4   | 0.16  |
| Rosmarinic acid | JUN       | 0.16  |
| Rosmarinic acid | MCL1      | 0.159 |
| Luteolin        | NR1H2     | 0.159 |
| Luteolin        | NR1H3     | 0.159 |
| Rosmarinic acid | TYSND1    | 0.159 |
| Rosmarinic acid | TYR       | 0.158 |
| Luteolin        | GRB2      | 0.157 |
| Calycosin       | RERGL     | 0.157 |
| Acacetin        | MKNK1     | 0.156 |
| Acacetin        | MKNK2     | 0.156 |
| Luteolin        | RPTOR     | 0.156 |
| Luteolin        | CPSF3     | 0.155 |
| Luteolin        | CPSF3L    | 0.155 |
| Luteolin        | ENSG00000 | 0.155 |
| Luteolin        | GAB4      | 0.155 |
| Luteolin        | GIGYF1    | 0.155 |
| Luteolin        | GIGYF2    | 0.155 |
| Luteolin        | GTPBP10   | 0.155 |
| Luteolin        | GTPBP5    | 0.155 |
| Luteolin        | IST1      | 0.155 |
| Luteolin        | MTMR6     | 0.155 |
| Luteolin        | MTMR7     | 0.155 |
| Luteolin        | MTMR8     | 0.155 |
| Luteolin        | ATP5O     | 0.154 |
| Luteolin        | ENSG00000 | 0.154 |
| Acacetin        | CDK8      | 0.153 |
| Luteolin        | MRPS14    | 0.152 |
| Acacetin        | PPA2      | 0.152 |
| Luteolin        | SDHB      | 0.152 |
| Luteolin        | ZBTB8OS   | 0.152 |
| Luteolin        | MLH1      | 0.151 |
| Luteolin        | MLH3      | 0.151 |
| Luteolin        | PMS1      | 0.151 |
| Luteolin        | PMS2      | 0.151 |
| Rosmarinic acid | ADAM17    | 0.15  |
| Diosmetin       | AHR       | 0.15  |
| Luteolin        | BAX       | 0.15  |
| Calycosin       | CCNB1     | 0.15  |
| Calycosin       | CCND3     | 0.15  |
| Calycosin       | CCNG1     | 0.15  |
| Luteolin        | CD74      | 0.15  |
| Luteolin        | CDK1      | 0.15  |

|                 |         |      |
|-----------------|---------|------|
| Calycosin       | CDK7    | 0.15 |
| Calycosin       | CDKN1A  | 0.15 |
| Luteolin        | CDKN1A  | 0.15 |
| Calycosin       | CDKN1C  | 0.15 |
| Calycosin       | CDKN2D  | 0.15 |
| Luteolin        | CSF2    | 0.15 |
| Rosmarinic acid | DNMT1   | 0.15 |
| Luteolin        | EGR1    | 0.15 |
| Calycosin       | EPO     | 0.15 |
| Calycosin       | ERP29   | 0.15 |
| Luteolin        | FBP1    | 0.15 |
| Luteolin        | GADD45B | 0.15 |
| Calycosin       | HIF1A   | 0.15 |
| Luteolin        | IL4     | 0.15 |
| Calycosin       | KRT1    | 0.15 |
| Calycosin       | LASP1   | 0.15 |
| Calycosin       | MCM5    | 0.15 |
| Calycosin       | MCM6    | 0.15 |
| Luteolin        | MMP1    | 0.15 |
| Luteolin        | MPC2    | 0.15 |
| Calycosin       | NME1    | 0.15 |
| Luteolin        | NR1D1   | 0.15 |
| Calycosin       | PEBP1   | 0.15 |
| Calycosin       | PGAM1   | 0.15 |
| Calycosin       | PRDX1   | 0.15 |
| Calycosin       | PRDX2   | 0.15 |
| Luteolin        | PSCA    | 0.15 |
| Luteolin        | PTK6    | 0.15 |
| Calycosin       | RAD9A   | 0.15 |
| Calycosin       | RBX1    | 0.15 |
| Luteolin        | SFN     | 0.15 |
| Calycosin       | SKP1    | 0.15 |
| Calycosin       | SKP2    | 0.15 |
| Calycosin       | STIP1   | 0.15 |
| Luteolin        | TP53I3  | 0.15 |
| Luteolin        | TP63    | 0.15 |
| Luteolin        | TP73    | 0.15 |
| Calycosin       | UBE3A   | 0.15 |
| Luteolin        | VAV3    | 0.15 |
| Luteolin        | WISP2   | 0.15 |

---
